# Supplementary material
Source: bioRxiv or medRxiv preprint supplement (https://medrxiv.org/highwire/filestream/97456/field_highwire_adjunct_files/0/2020.09.17.20185090-1.pdf)
Supplement: Supplementary file [file 2020.09.17.20185090-1.pdf]

## Appendix A. Optimal selection of pharmacy locations in the US

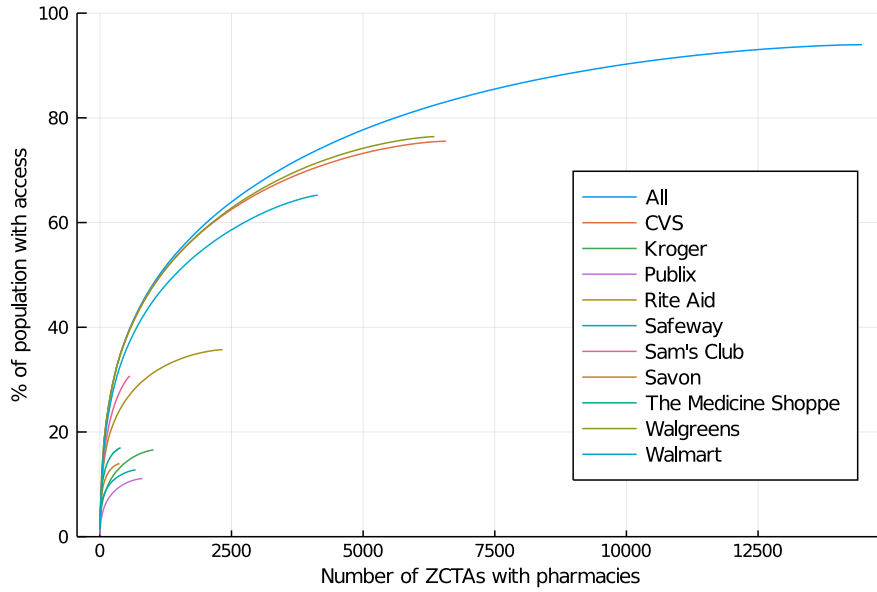

Figure A.1: Estimated fraction of the US population willing to travel to its closest pharmacy under an increasing maximum amount of pharmacies that administer COVID-19 testing. Results are shown for all pharmacies and for individual pharmacy chains.

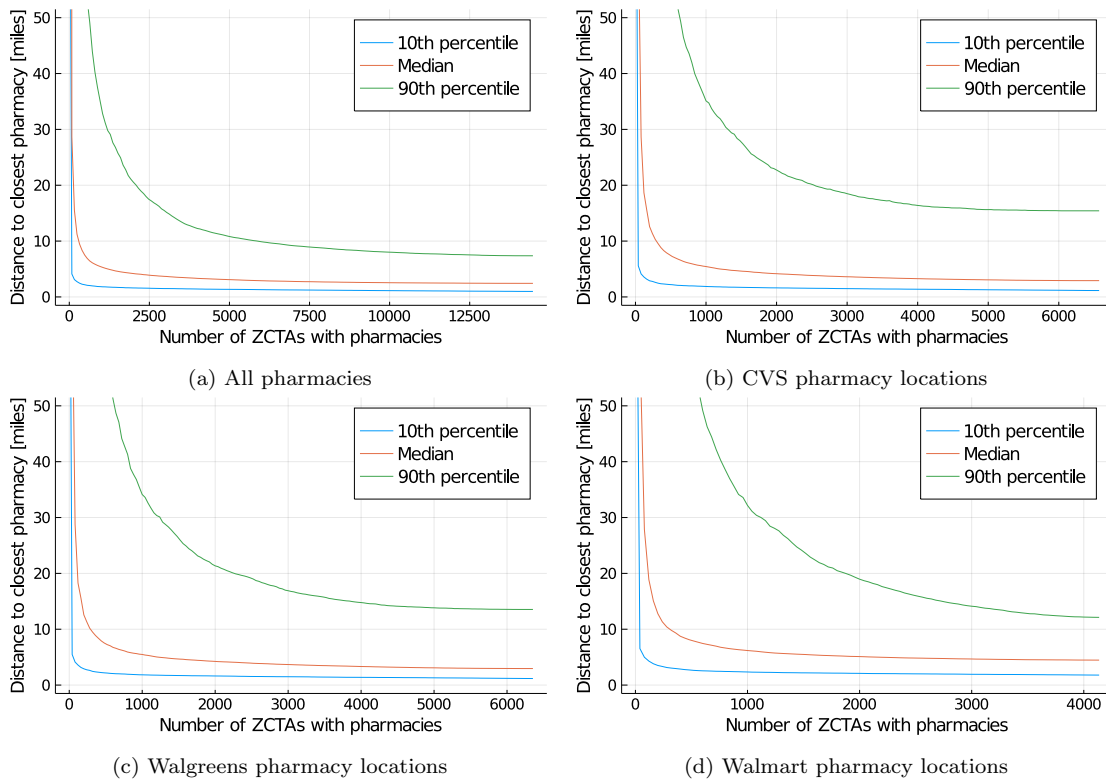

Figure A.2: Distances the population must travel (median, 10th percentile, and 90th percentile) given an optimal pharmacy selection under an increasing number of selected pharmacies. Part (a) shows all pharmacies while parts (b)-(d) show individual chains.

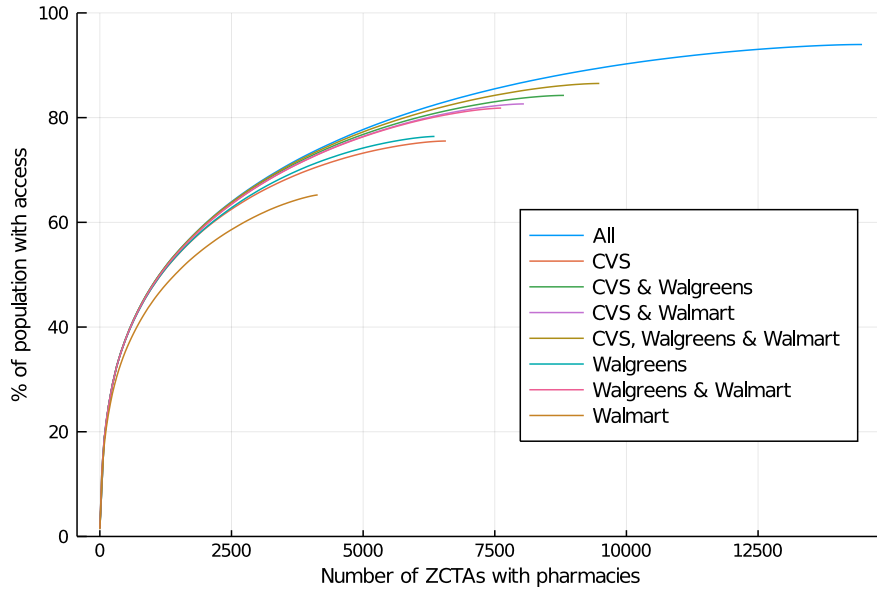

Figure A.3: Estimated fraction of the US population willing to travel to its closest pharmacy under an increasing maximum amount of pharmacies that administer COVID-19 testing. Results are shown for all pharmacies and the biggest pharmacy chains individually and as combinations.

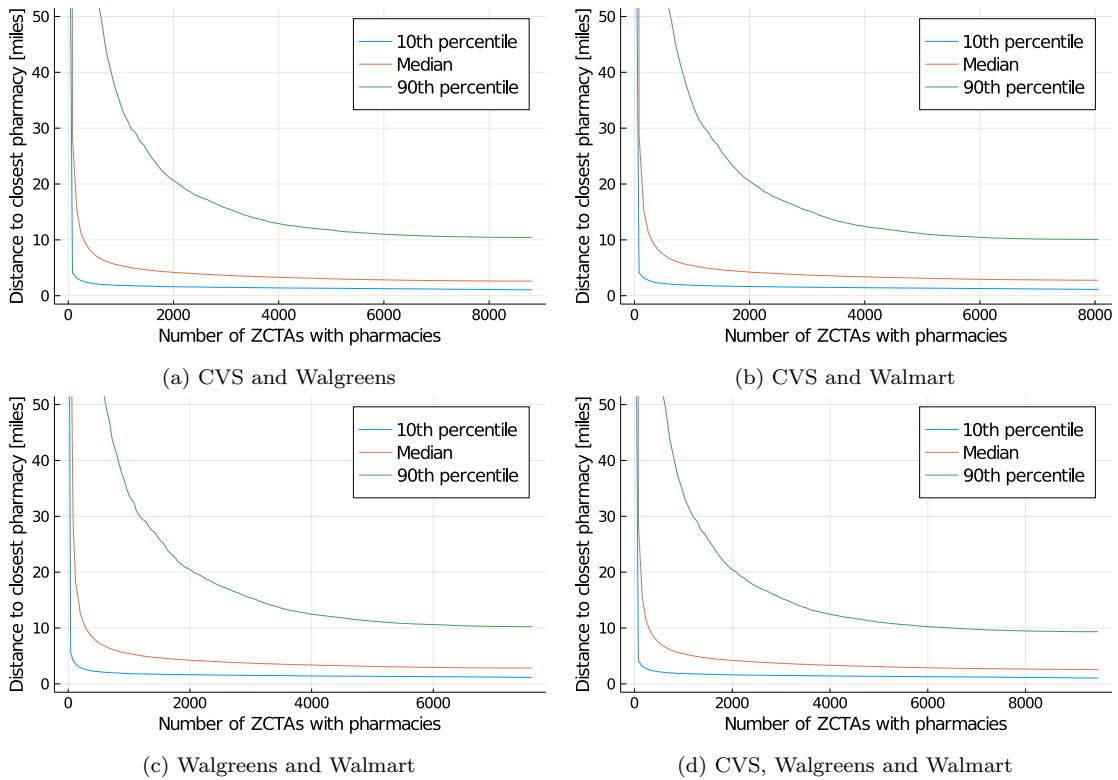

Figure A.4: Distances the population must travel (median, 10th percentile, and 90th percentile) given an optimal pharmacy selection under an increasing number of selected pharmacies. Parts (a)-(d) show different combinations of locations for the biggest pharmacy chains.

## Appendix B. Optimal selection of pharmacy locations in each of the 50 states

### Appendix B.1. Alabama

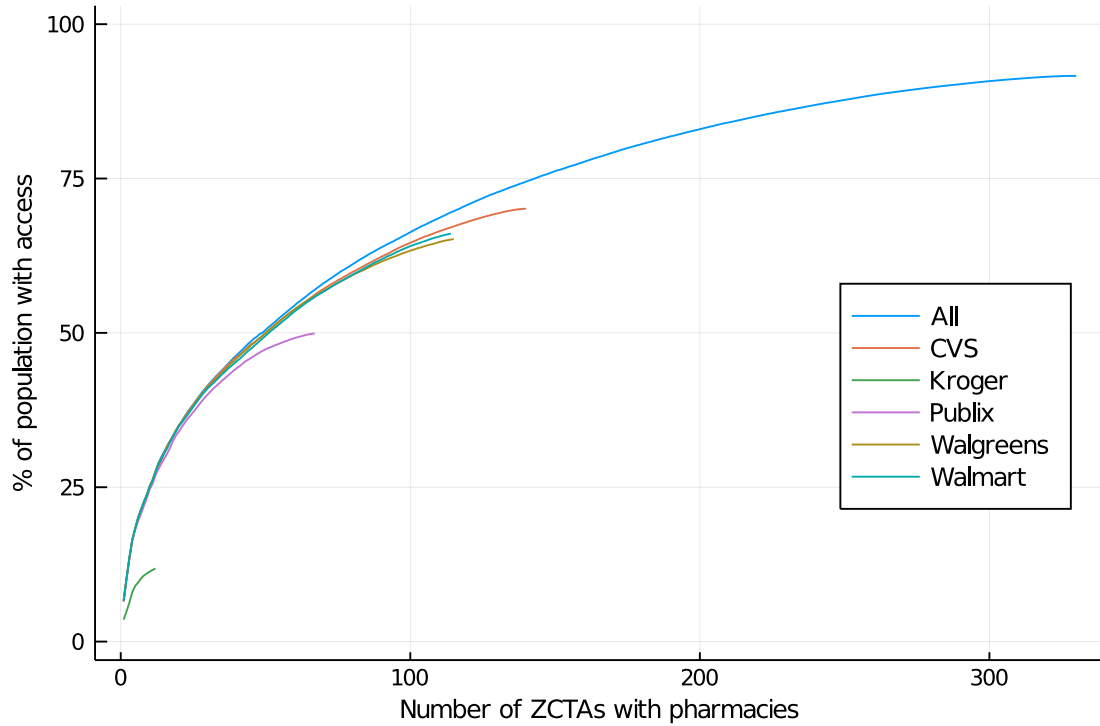

Figure B.5: Estimated fraction of the state’s population willing to travel to its closest pharmacy under an increasing maximum amount of pharmacies that administer COVID-19 testing. Results are shown for all pharmacies and for individual pharmacy chains.

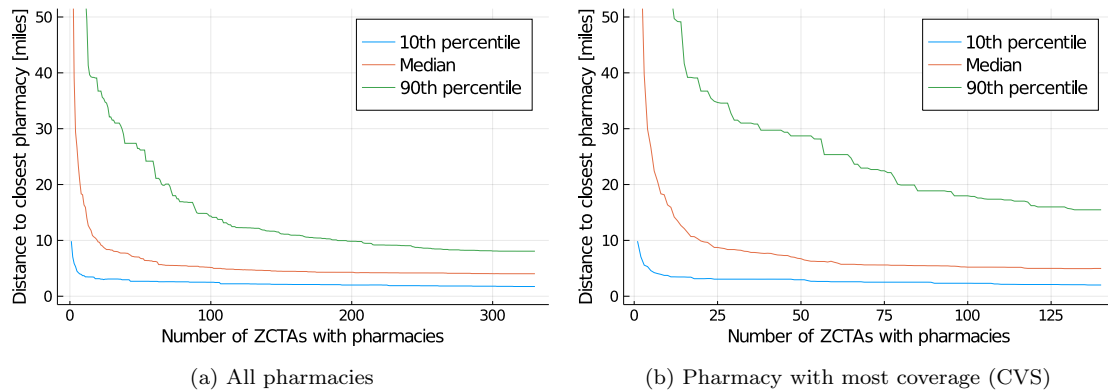

Figure B.6: Distances the population must travel (median, 10th percentile, and 90th percentile) given an optimal pharmacy selection under an increasing number of selected pharmacies. Part (a) shows all pharmacies while part (b) shows the chain with the best coverage.

Appendix B.2. Alaska

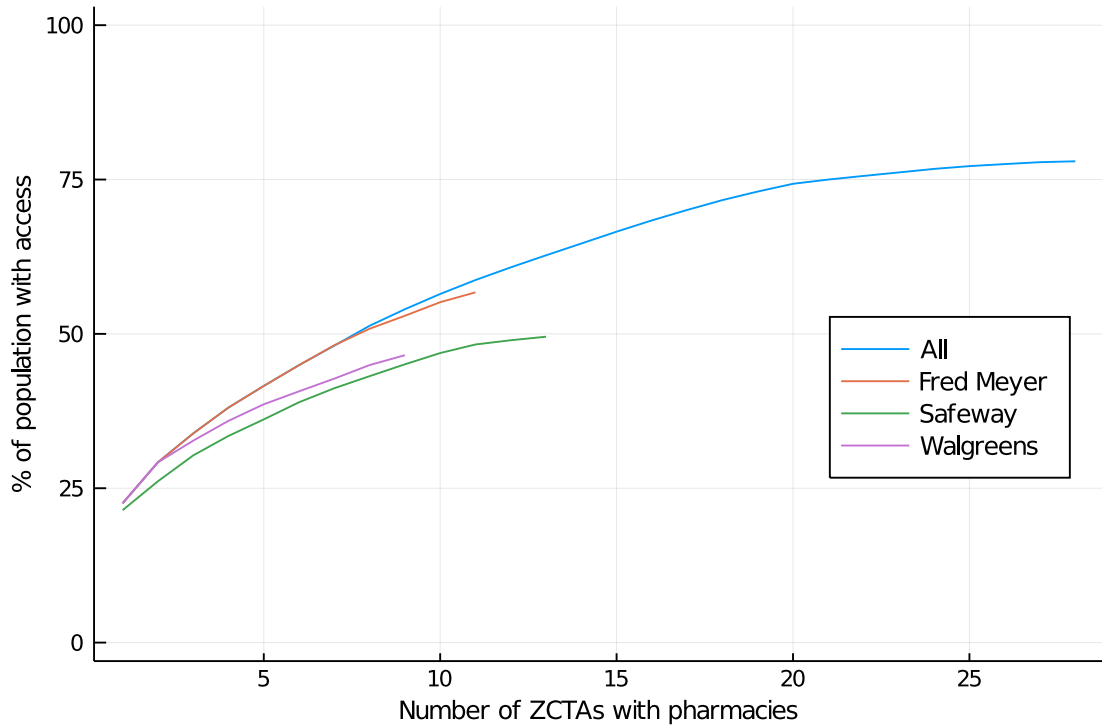

Figure B.7: Estimated fraction of the state’s population willing to travel to its closest pharmacy under an increasing maximum amount of pharmacies that administer COVID-19 testing. Results are shown for all pharmacies and for individual pharmacy chains.

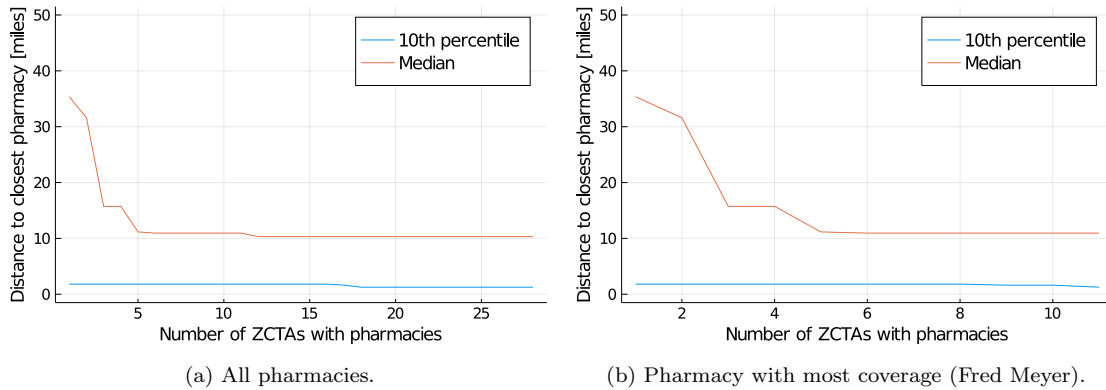

Figure B.8: Distances the population must travel (median and 10th percentile) given an optimal pharmacy selection under an increasing number of selected pharmacies. Part (a) shows all pharmacies while part (b) shows individual chains. Note: the 90th percentile of the travel distances for parts (a) and (b) exceed 50 miles.

Appendix B.3. Arizona

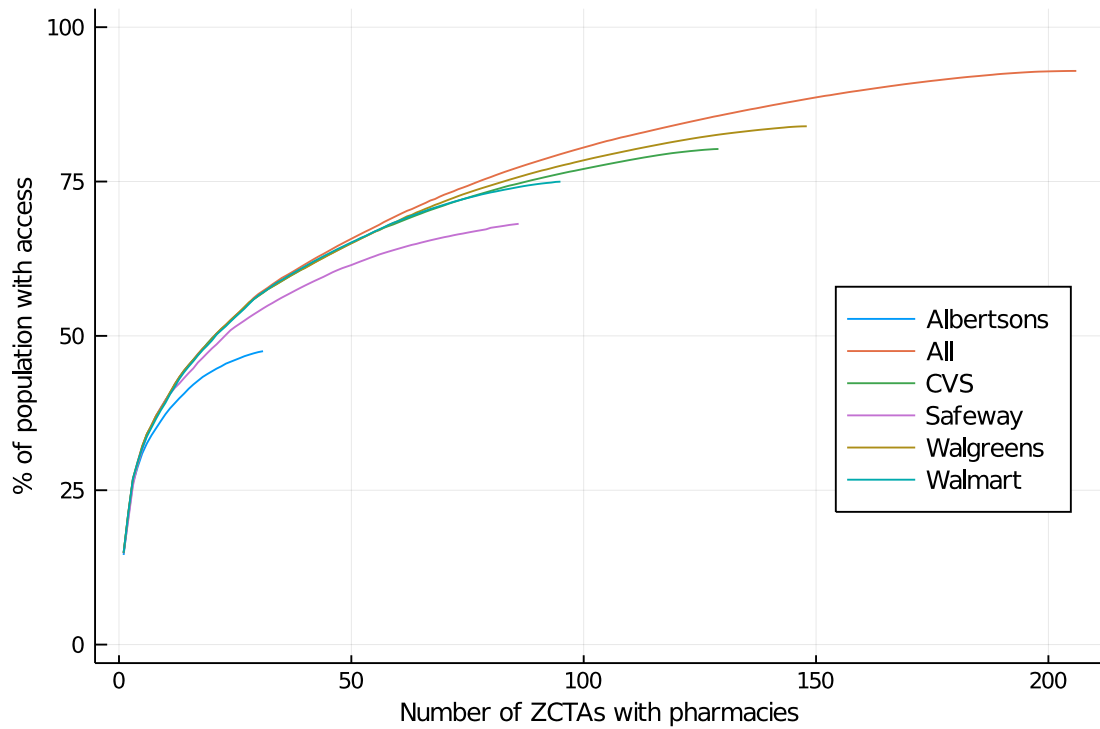

Figure B.9: Estimated fraction of the state’s population willing to travel to its closest pharmacy under an increasing maximum amount of pharmacies that administer COVID-19 testing. Results are shown for all pharmacies and for individual pharmacy chains.

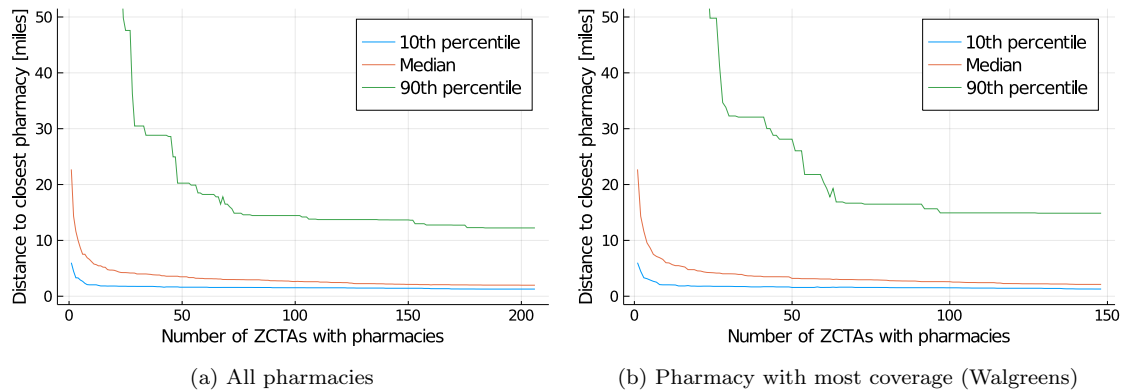

Figure B.10: Distances the population must travel (median, 10th percentile, and 90th percentile) given an optimal pharmacy selection under an increasing number of selected pharmacies. Part (a) shows all pharmacies while part (b) shows the chain with the best coverage.

Appendix B.4. Arkansas

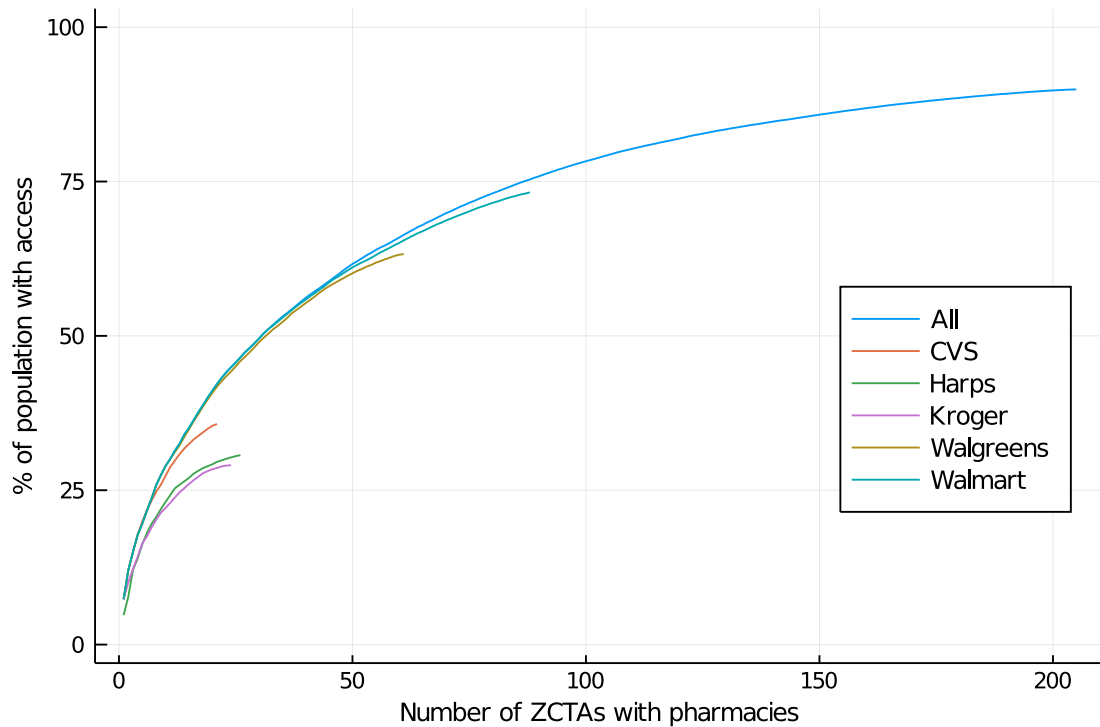

Figure B.11: Estimated fraction of the state’s population willing to travel to its closest pharmacy under an increasing maximum amount of pharmacies that administer COVID-19 testing. Results are shown for all pharmacies and for individual pharmacy chains.

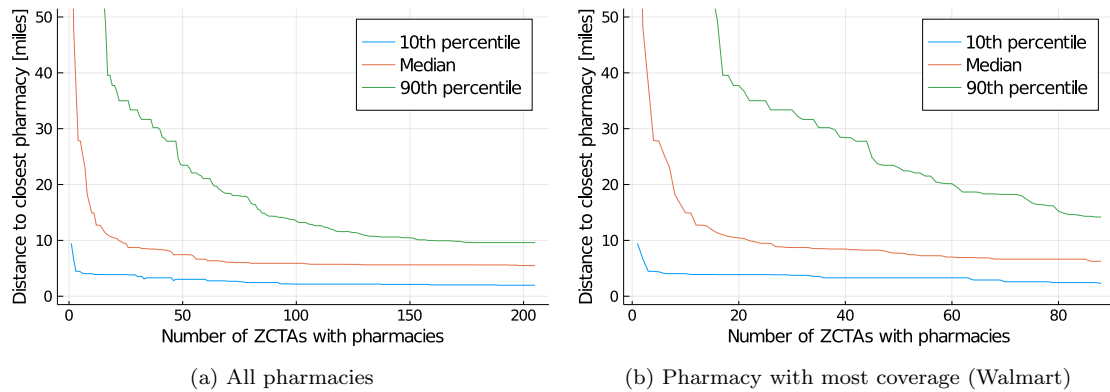

Figure B.12: Distances the population must travel (median, 10th percentile, and 90th percentile) given an optimal pharmacy selection under an increasing number of selected pharmacies. Part (a) shows all pharmacies while part (b) shows the chain with the best coverage.

Appendix B.5. California

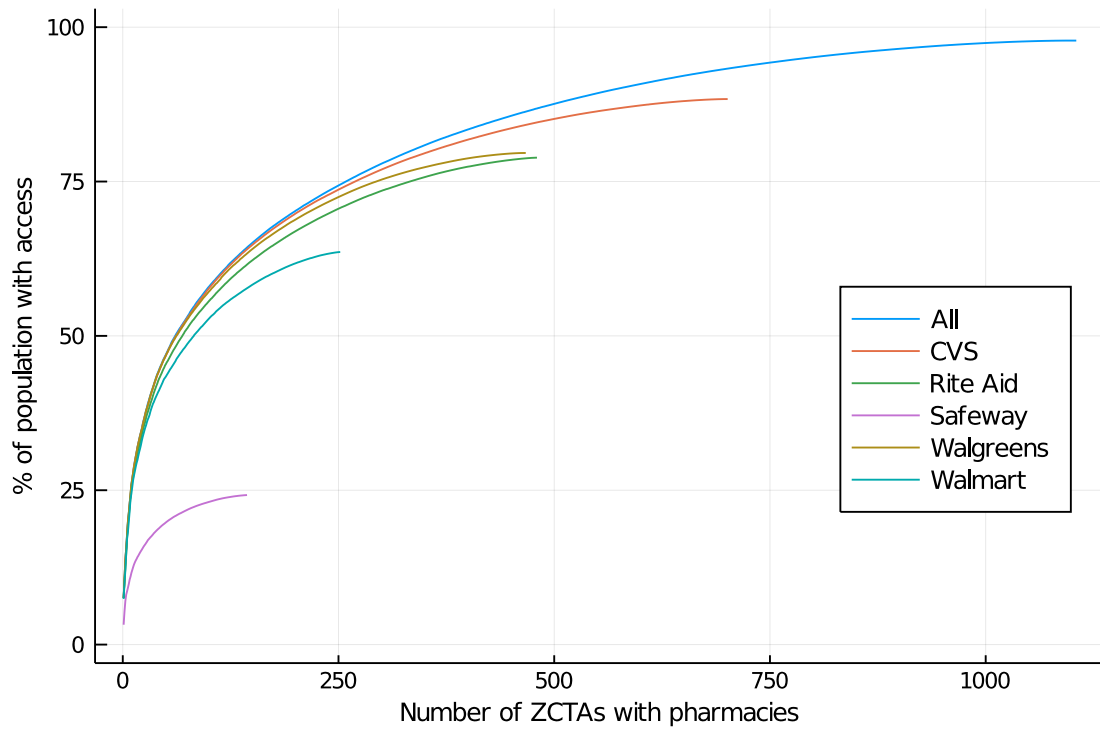

Figure B.13: Estimated fraction of the state’s population willing to travel to its closest pharmacy under an increasing maximum amount of pharmacies that administer COVID-19 testing. Results are shown for all pharmacies and for individual pharmacy chains.

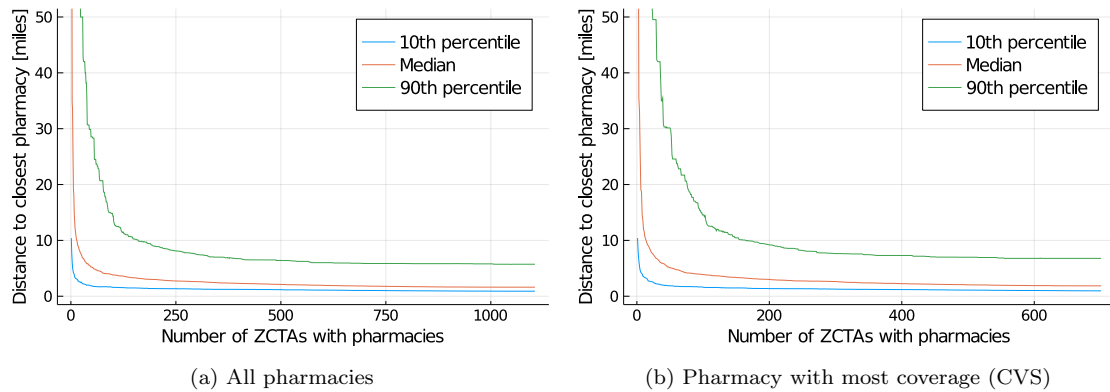

Figure B.14: Distances the population must travel (median, 10th percentile, and 90th percentile) given an optimal pharmacy selection under an increasing number of selected pharmacies. Part (a) shows all pharmacies while part (b) shows the chain with the best coverage.

Appendix B.6. Colorado

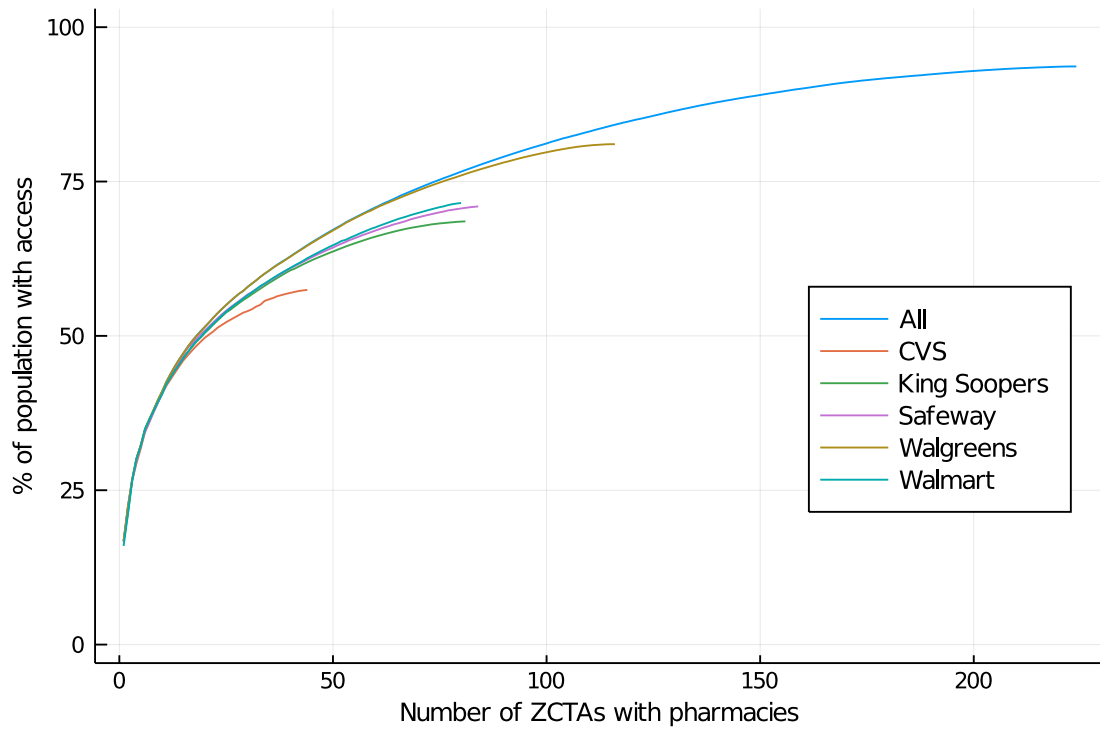

Figure B.15: Estimated fraction of the state’s population willing to travel to its closest pharmacy under an increasing maximum amount of pharmacies that administer COVID-19 testing. Results are shown for all pharmacies and for individual pharmacy chains.

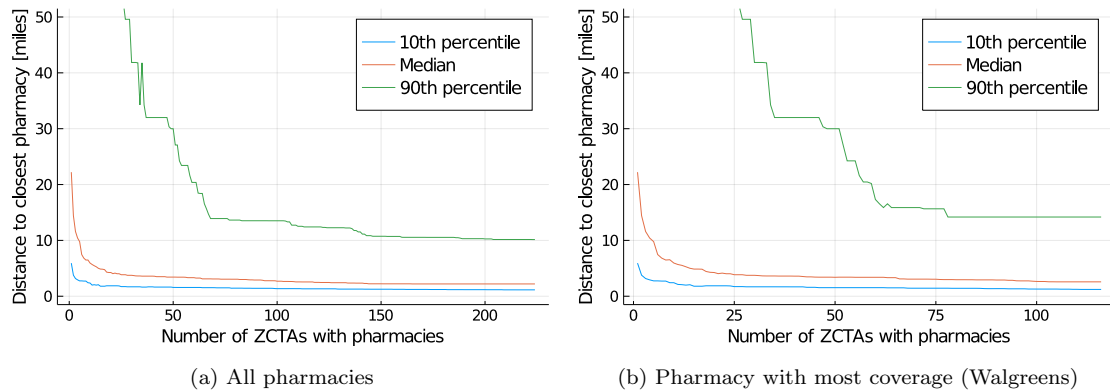

Figure B.16: Distances the population must travel (median, 10th percentile, and 90th percentile) given an optimal pharmacy selection under an increasing number of selected pharmacies. Part (a) shows all pharmacies while part (b) shows the chain with the best coverage.



Appendix B.7. Connecticut

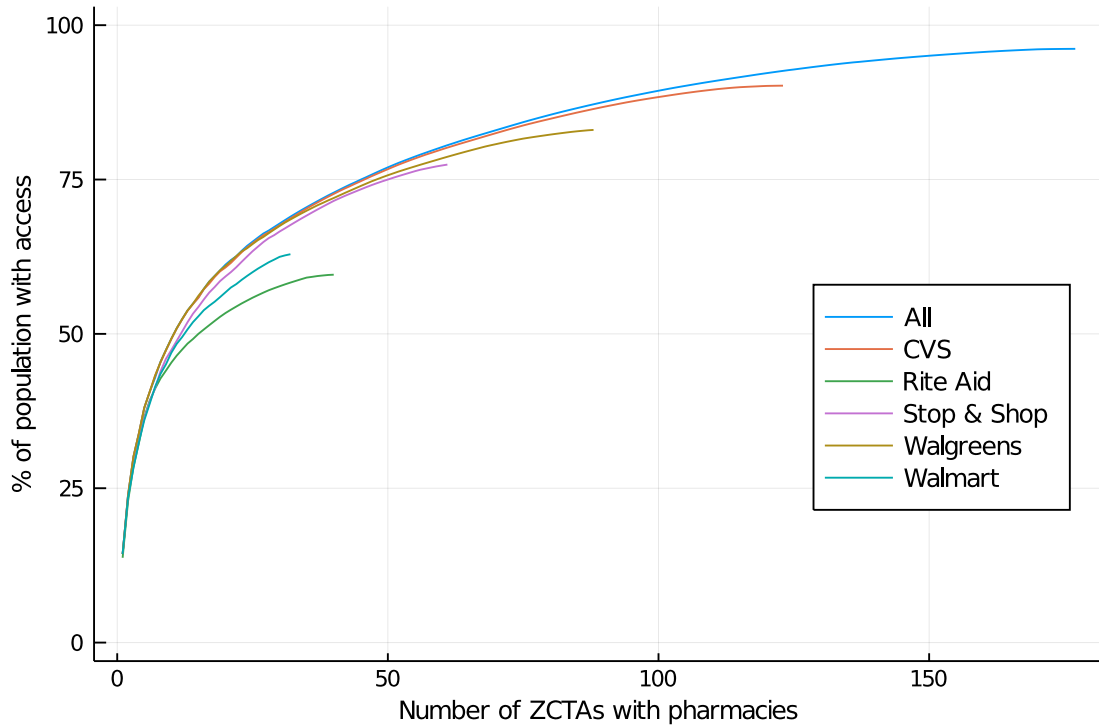

Figure B.17: Estimated fraction of the state’s population willing to travel to its closest pharmacy under an increasing maximum amount of pharmacies that administer COVID-19 testing. Results are shown for all pharmacies and for individual pharmacy chains.

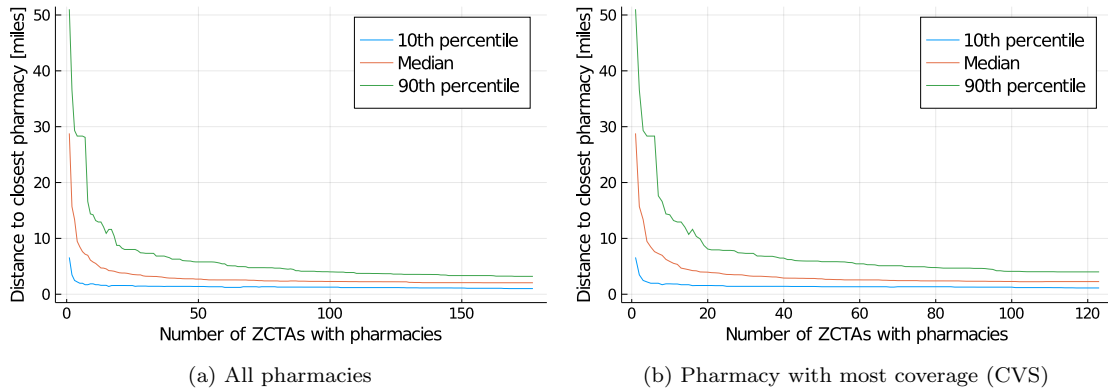

Figure B.18: Distances the population must travel (median, 10th percentile, and 90th percentile) given an optimal pharmacy selection under an increasing number of selected pharmacies. Part (a) shows all pharmacies while part (b) shows the chain with the best coverage.

Appendix B.8. Delaware

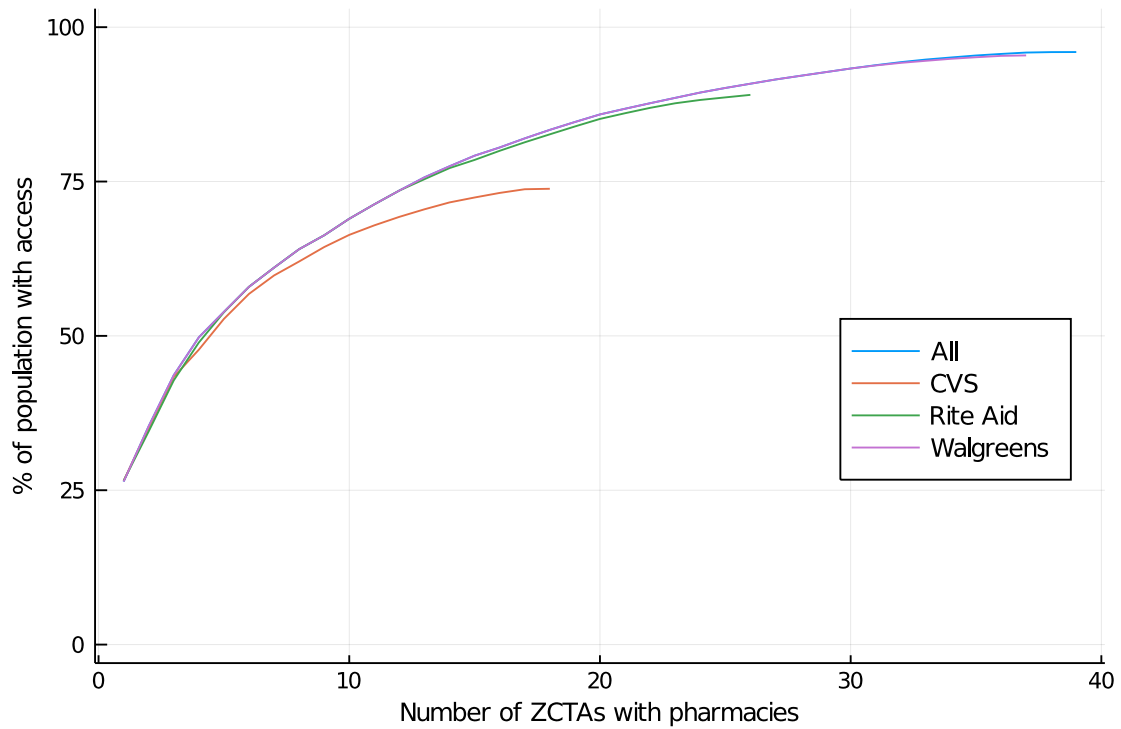

Figure B.19: Estimated fraction of the state’s population willing to travel to its closest pharmacy under an increasing maximum amount of pharmacies that administer COVID-19 testing. Results are shown for all pharmacies and for individual pharmacy chains.

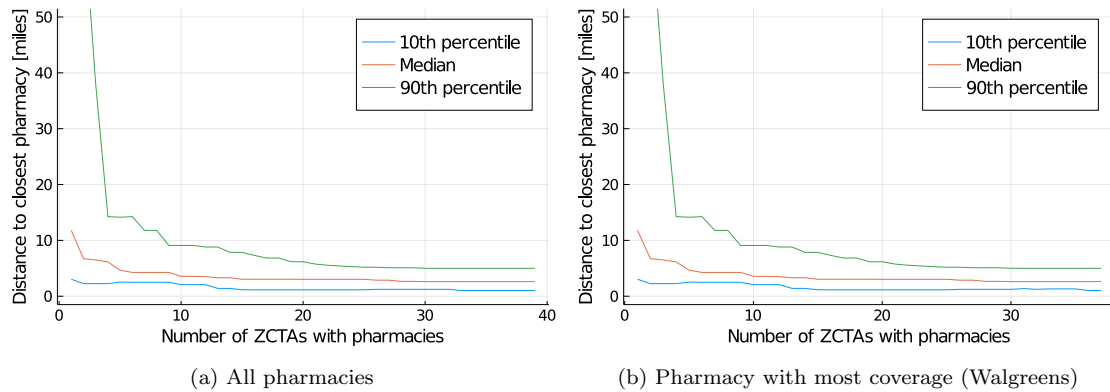

Figure B.20: Distances the population must travel (median, 10th percentile, and 90th percentile) given an optimal pharmacy selection under an increasing number of selected pharmacies. Part (a) shows all pharmacies while part (b) shows the chain with the best coverage.

Appendix B.9. Florida

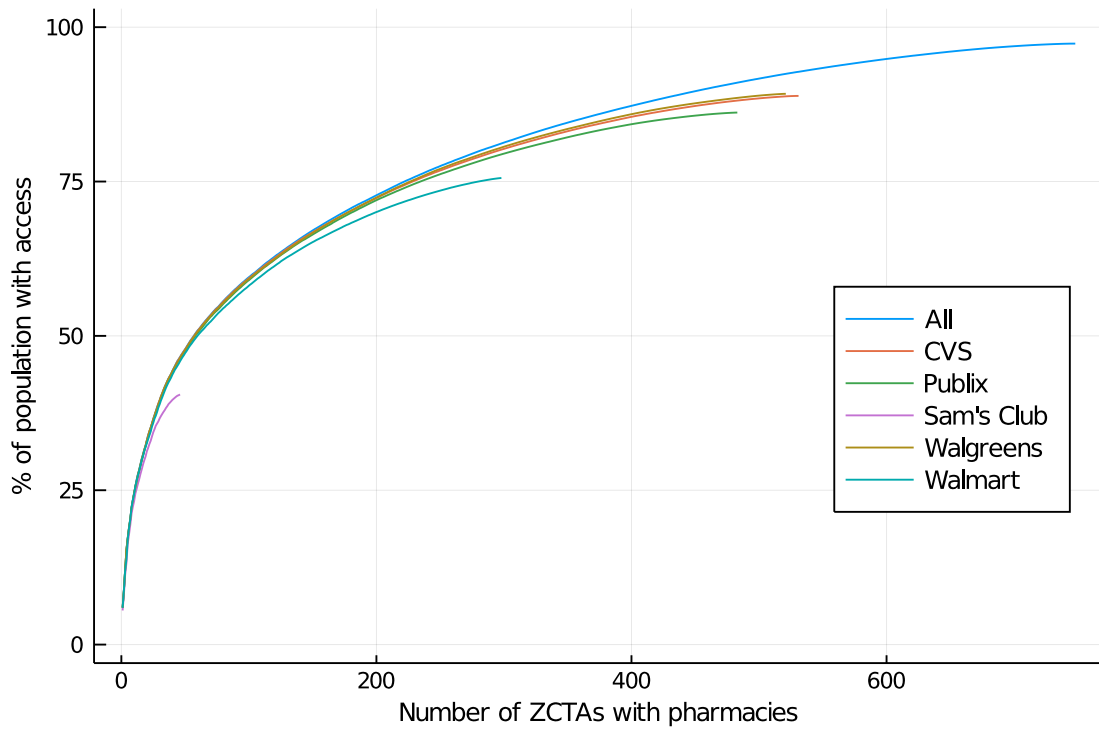

Figure B.21: Estimated fraction of the state’s population willing to travel to its closest pharmacy under an increasing maximum amount of pharmacies that administer COVID-19 testing. Results are shown for all pharmacies and for individual pharmacy chains.

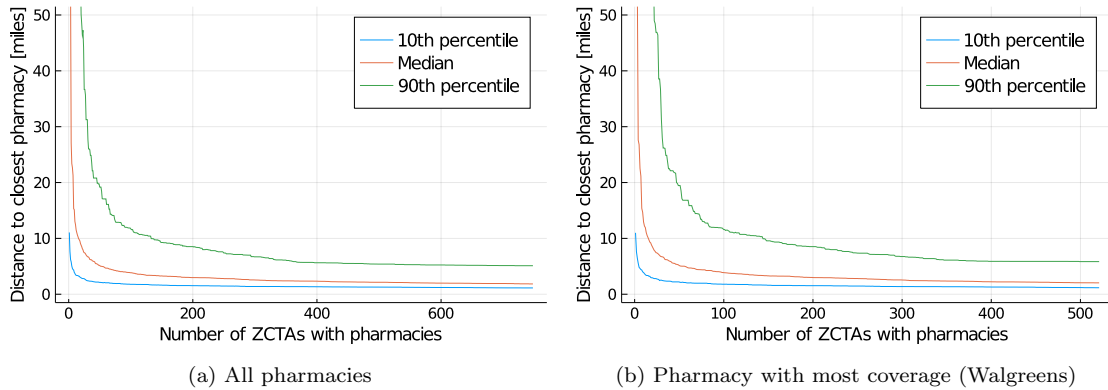

Figure B.22: Distances the population must travel (median, 10th percentile, and 90th percentile) given an optimal pharmacy selection under an increasing number of selected pharmacies. Part (a) shows all pharmacies while part (b) shows the chain with the best coverage.

Appendix B.10. Georgia

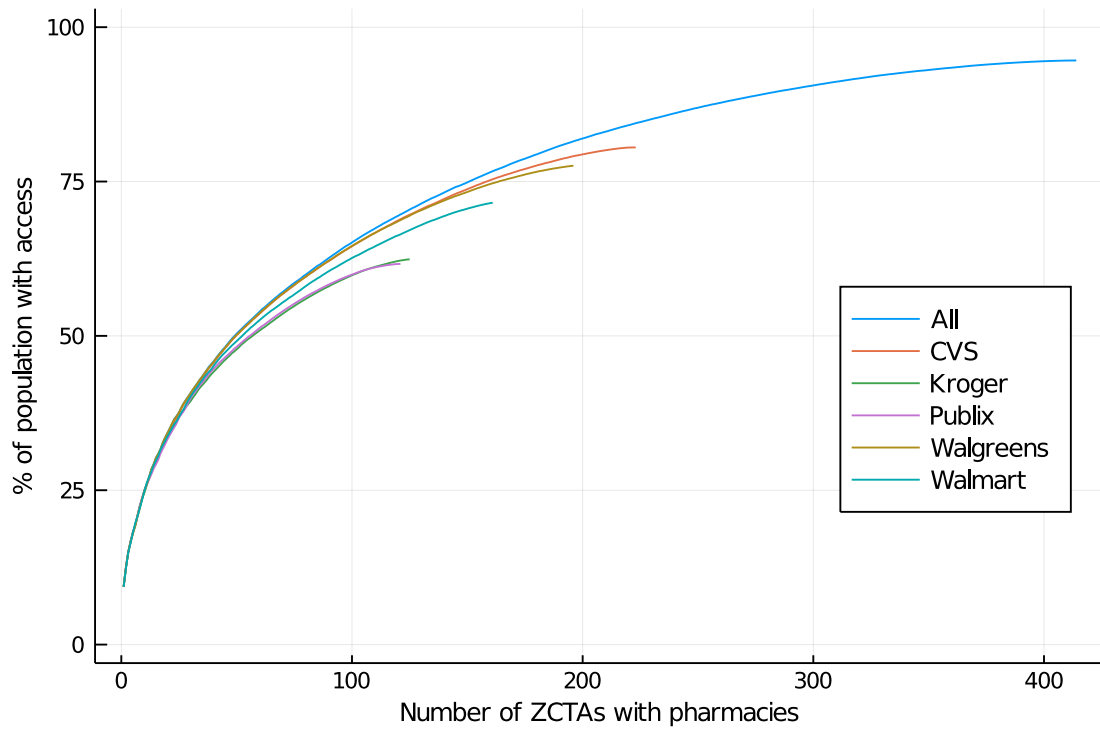

Figure B.23: Estimated fraction of the state’s population willing to travel to its closest pharmacy under an increasing maximum amount of pharmacies that administer COVID-19 testing. Results are shown for all pharmacies and for individual pharmacy chains.

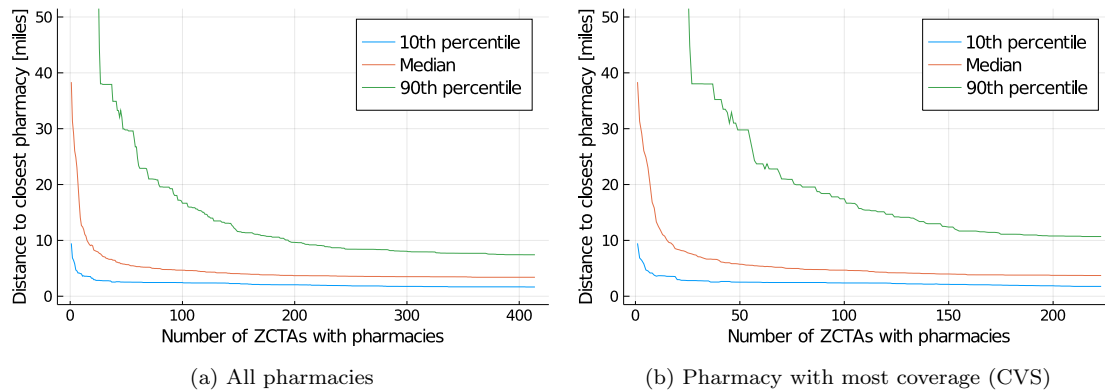

Figure B.24: Distances the population must travel (median, 10th percentile, and 90th percentile) given an optimal pharmacy selection under an increasing number of selected pharmacies. Part (a) shows all pharmacies while part (b) shows the chain with the best coverage.

Appendix B.11. Hawaii

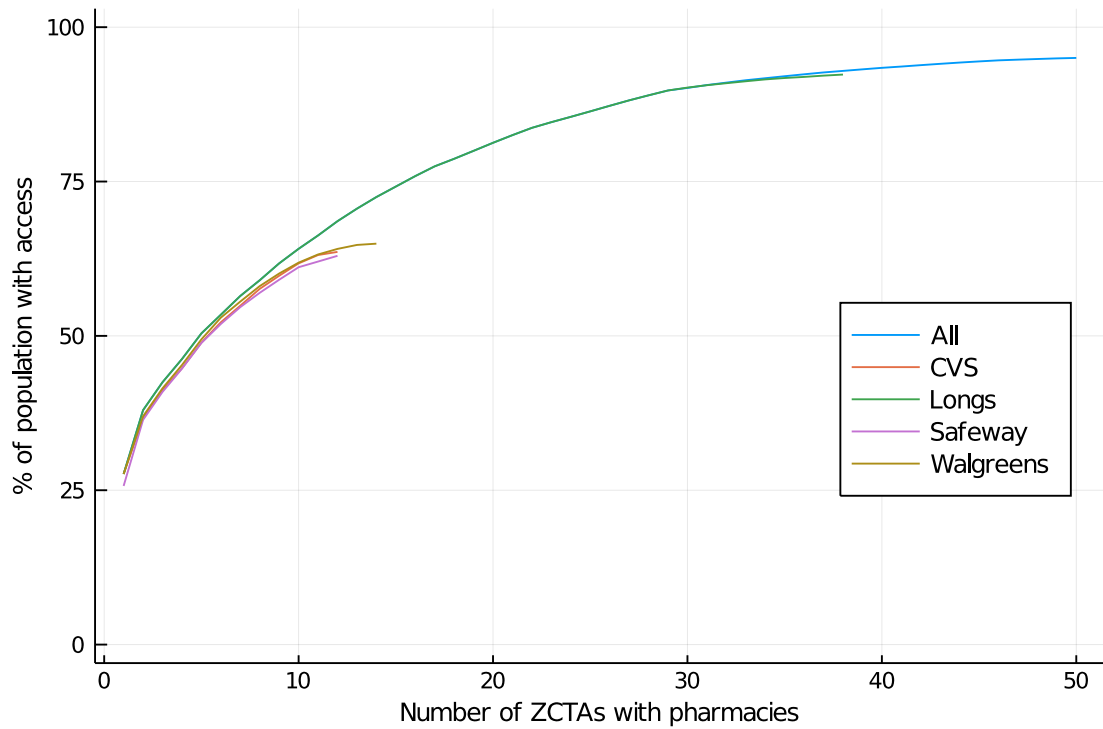

Figure B.25: Estimated fraction of the state’s population willing to travel to its closest pharmacy under an increasing maximum amount of pharmacies that administer COVID-19 testing. Results are shown for all pharmacies and for individual pharmacy chains.

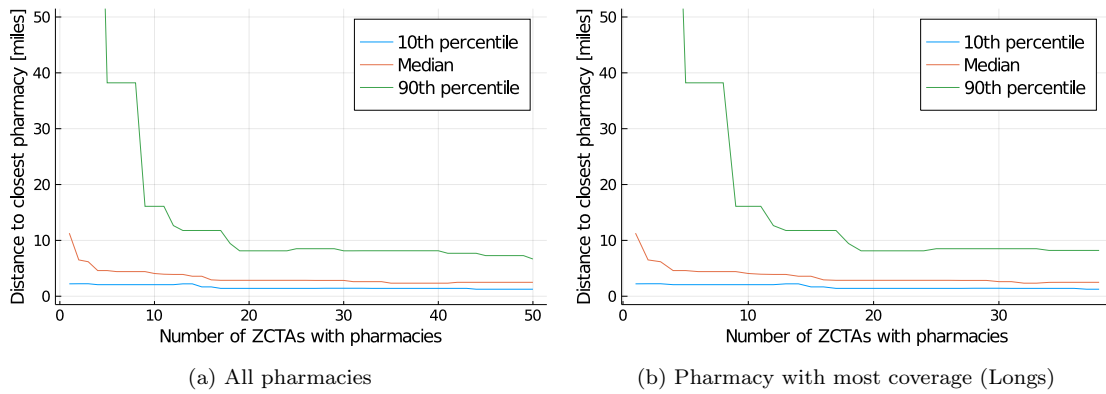

Figure B.26: Distances the population must travel (median, 10th percentile, and 90th percentile) given an optimal pharmacy selection under an increasing number of selected pharmacies. Part (a) shows all pharmacies while part (b) shows the chain with the best coverage.

Appendix B.12. Idaho

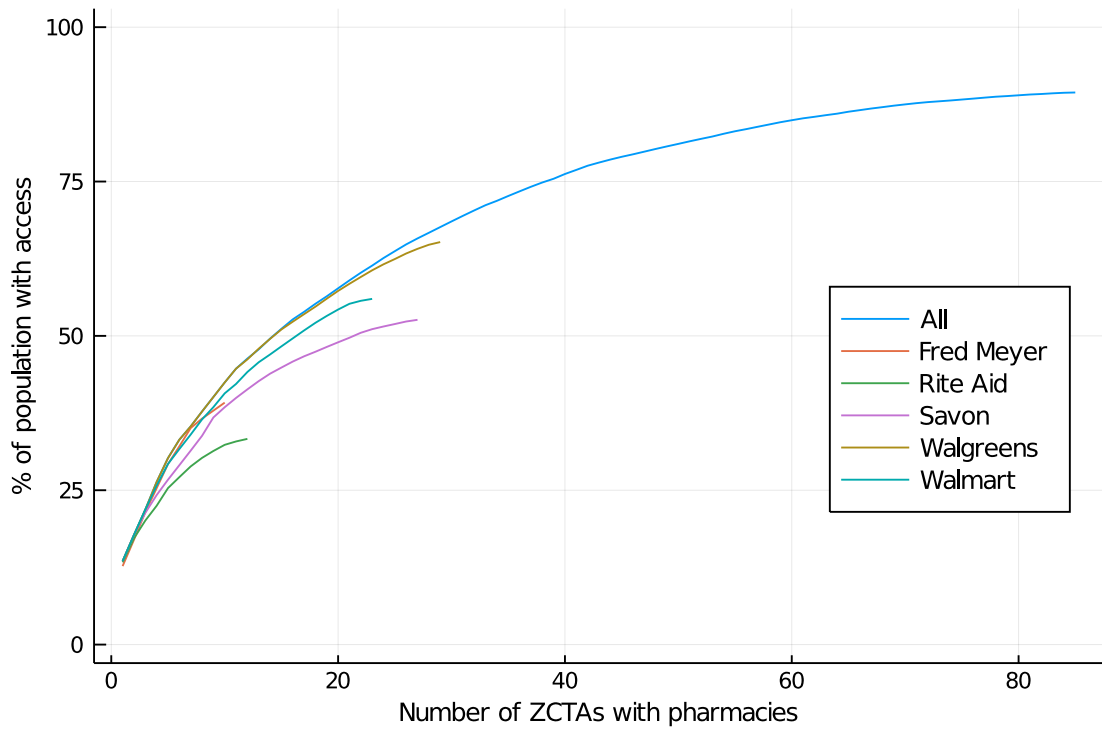

Figure B.27: Estimated fraction of the state’s population willing to travel to its closest pharmacy under an increasing maximum amount of pharmacies that administer COVID-19 testing. Results are shown for all pharmacies and for individual pharmacy chains.

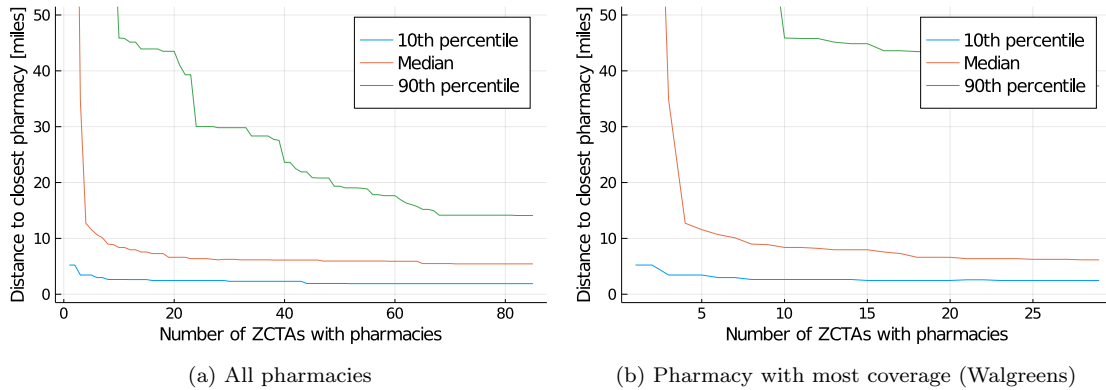

Figure B.28: Distances the population must travel (median, 10th percentile, and 90th percentile) given an optimal pharmacy selection under an increasing number of selected pharmacies. Part (a) shows all pharmacies while part (b) shows the chain with the best coverage.

Appendix B.13. Illinois

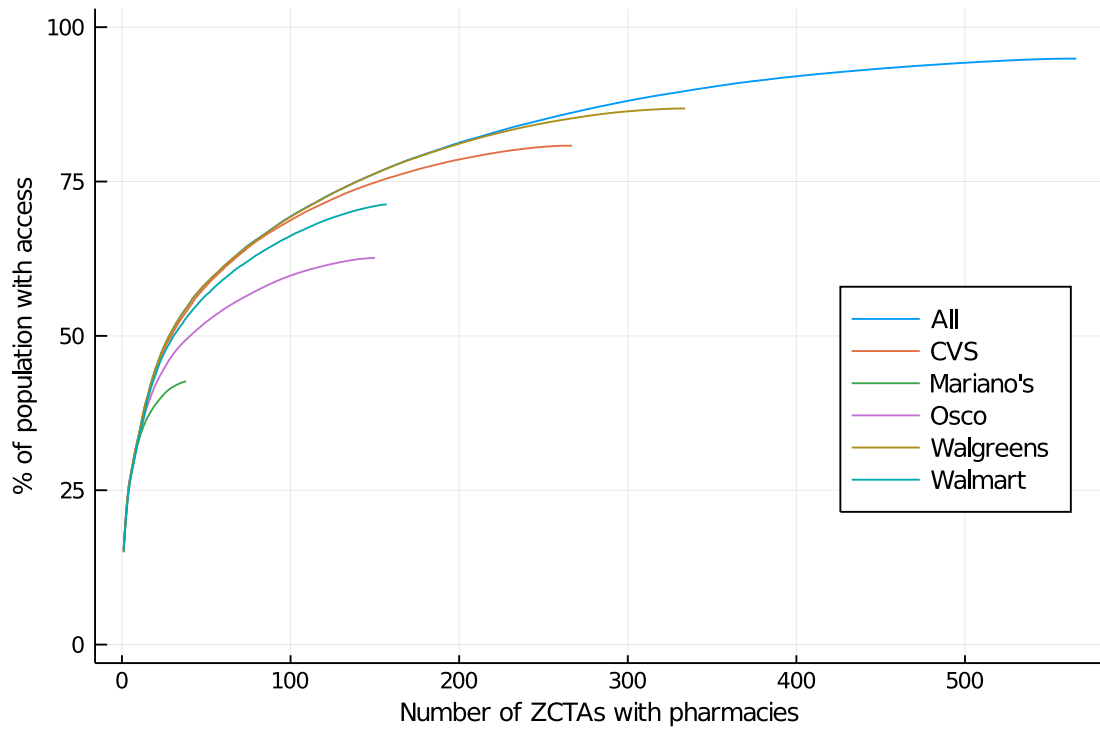

Figure B.29: Estimated fraction of the state’s population willing to travel to its closest pharmacy under an increasing maximum amount of pharmacies that administer COVID-19 testing. Results are shown for all pharmacies and for individual pharmacy chains.

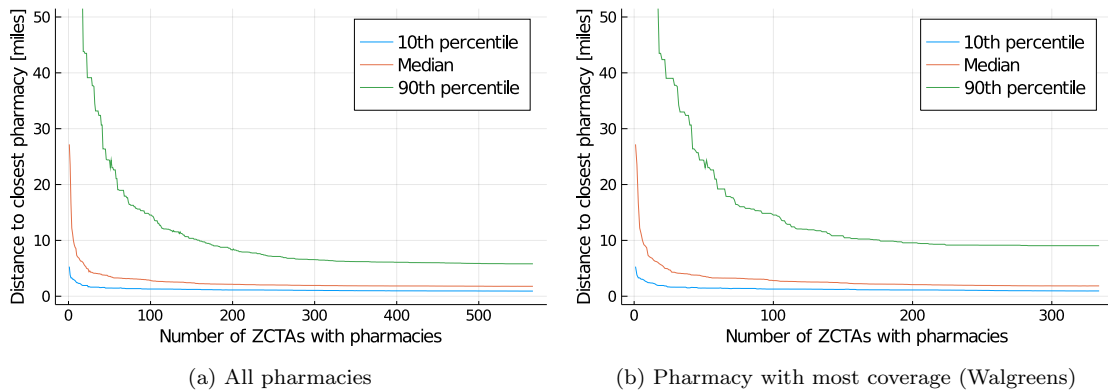

Figure B.30: Distances the population must travel (median, 10th percentile, and 90th percentile) given an optimal pharmacy selection under an increasing number of selected pharmacies. Part (a) shows all pharmacies while part (b) shows the chain with the best coverage.

Appendix B.14. Indiana

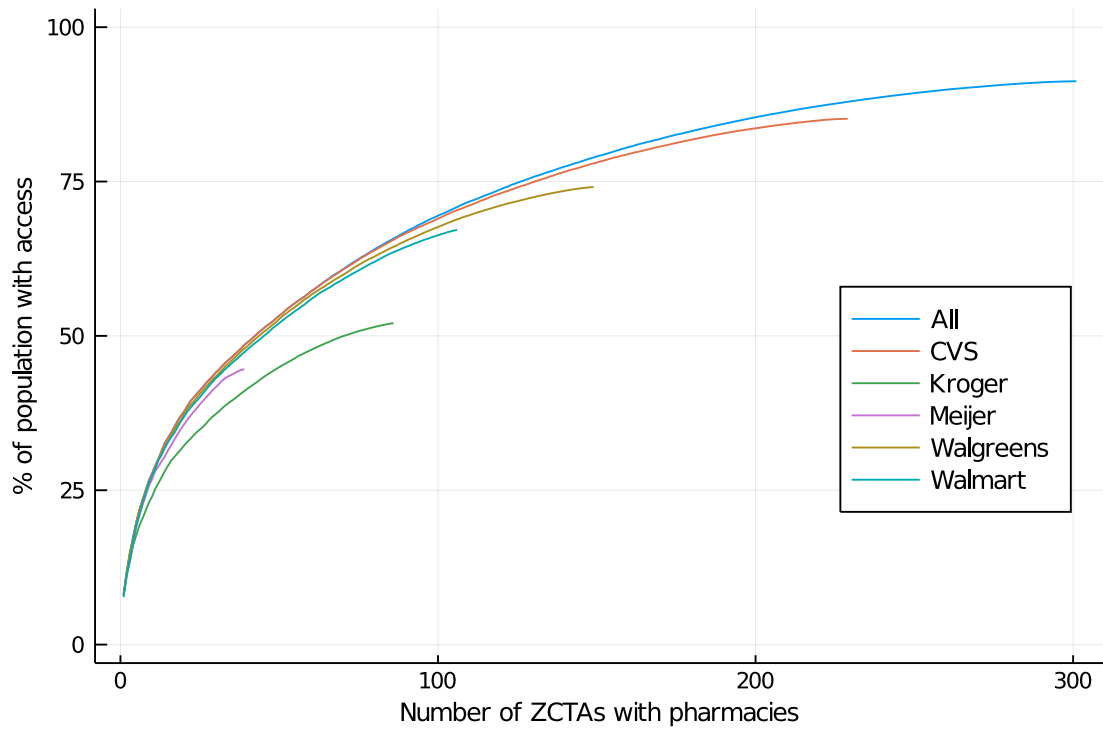

Figure B.31: Estimated fraction of the state’s population willing to travel to its closest pharmacy under an increasing maximum amount of pharmacies that administer COVID-19 testing. Results are shown for all pharmacies and for individual pharmacy chains.

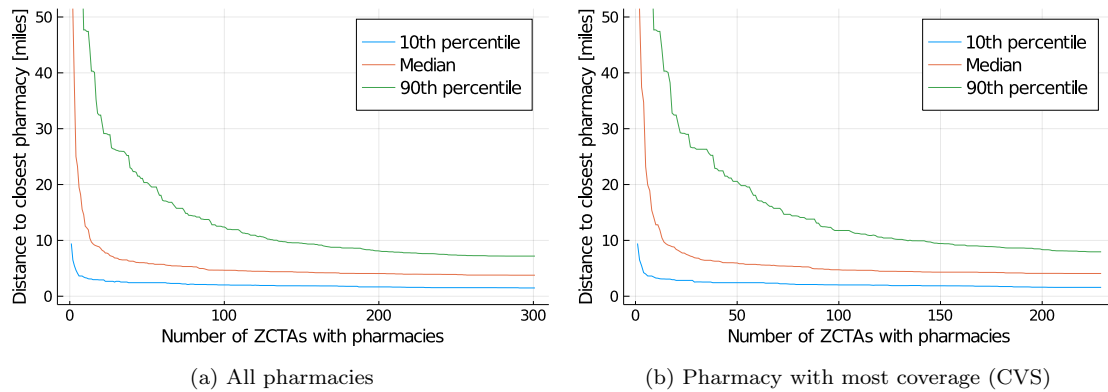

Figure B.32: Distances the population must travel (median, 10th percentile, and 90th percentile) given an optimal pharmacy selection under an increasing number of selected pharmacies. Part (a) shows all pharmacies while part (b) shows the chain with the best coverage.



Appendix B.15. Iowa

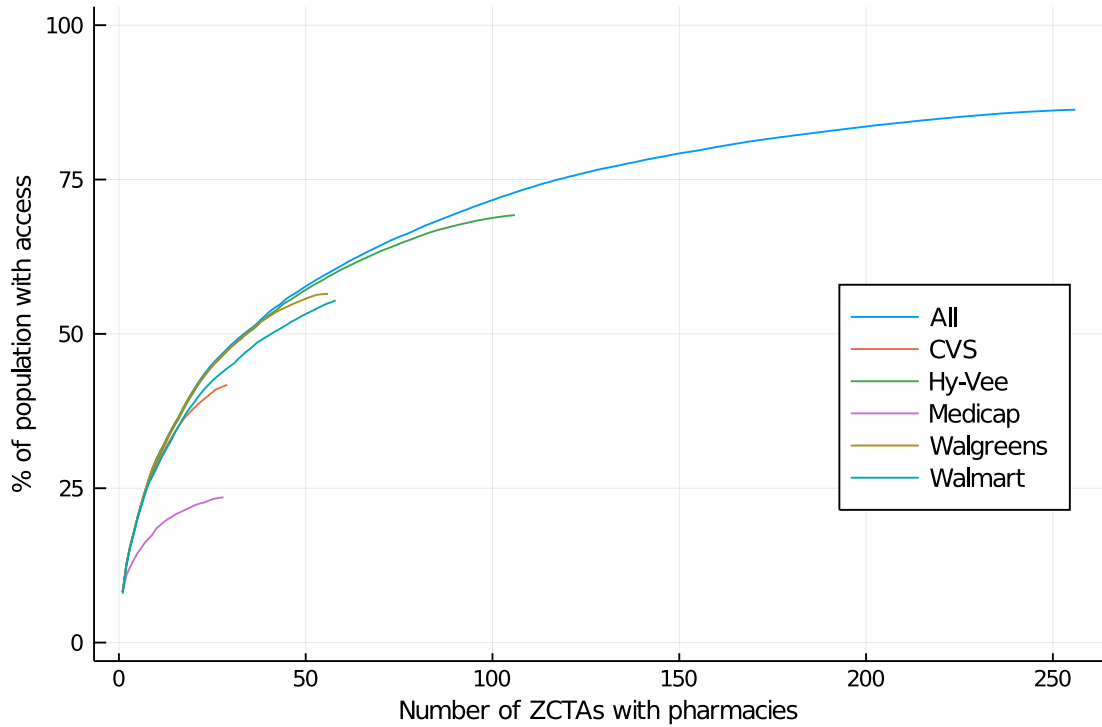

Figure B.33: Estimated fraction of the state’s population willing to travel to its closest pharmacy under an increasing maximum amount of pharmacies that administer COVID-19 testing. Results are shown for all pharmacies and for individual pharmacy chains.

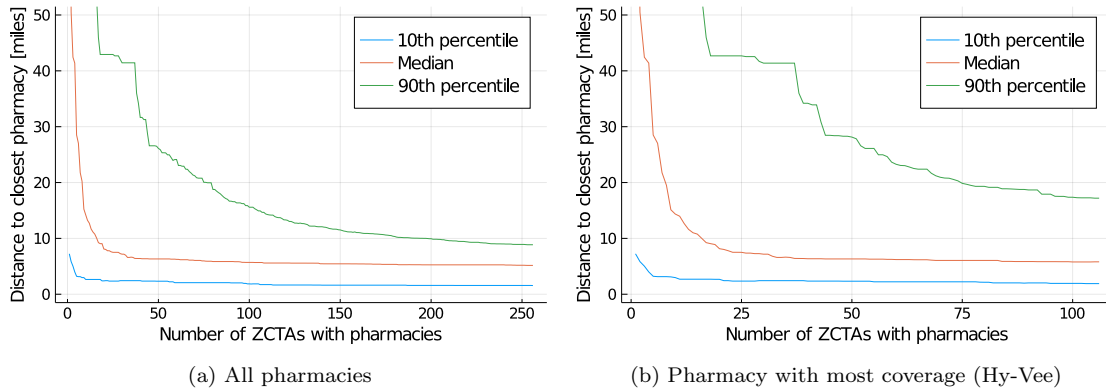

Figure B.34: Distances the population must travel (median, 10th percentile, and 90th percentile) given an optimal pharmacy selection under an increasing number of selected pharmacies. Part (a) shows all pharmacies while part (b) shows the chain with the best coverage.

Appendix B.16. Kansas

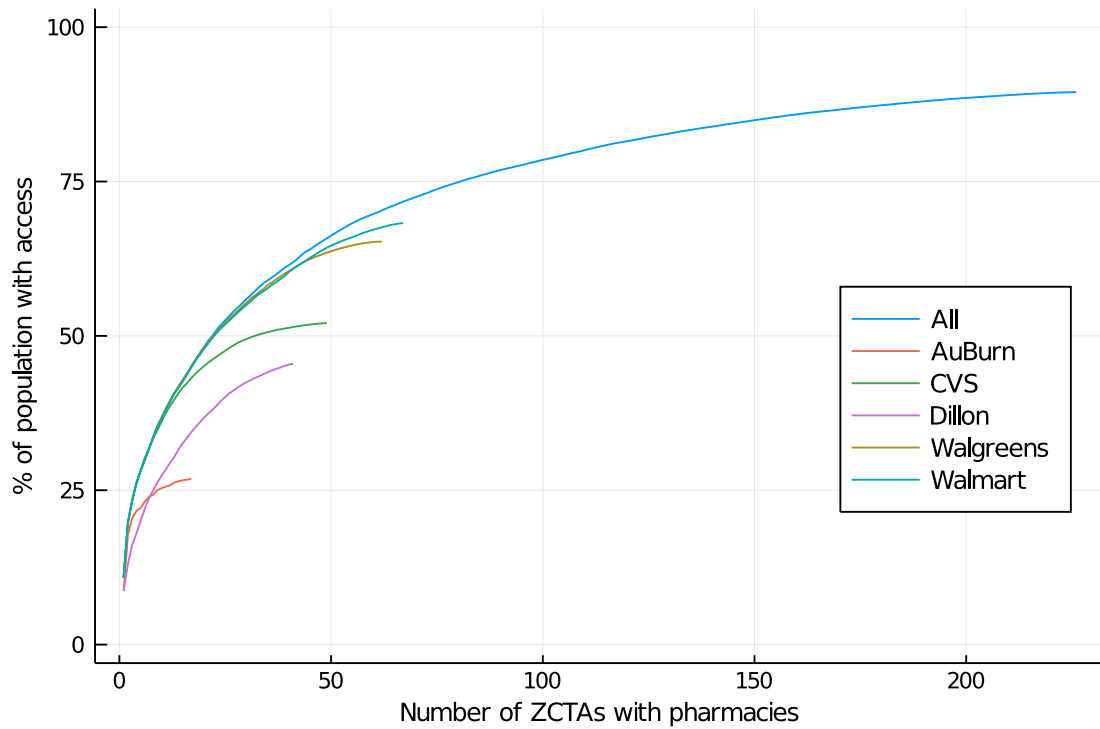

Figure B.35: Estimated fraction of the state’s population willing to travel to its closest pharmacy under an increasing maximum amount of pharmacies that administer COVID-19 testing. Results are shown for all pharmacies and for individual pharmacy chains.

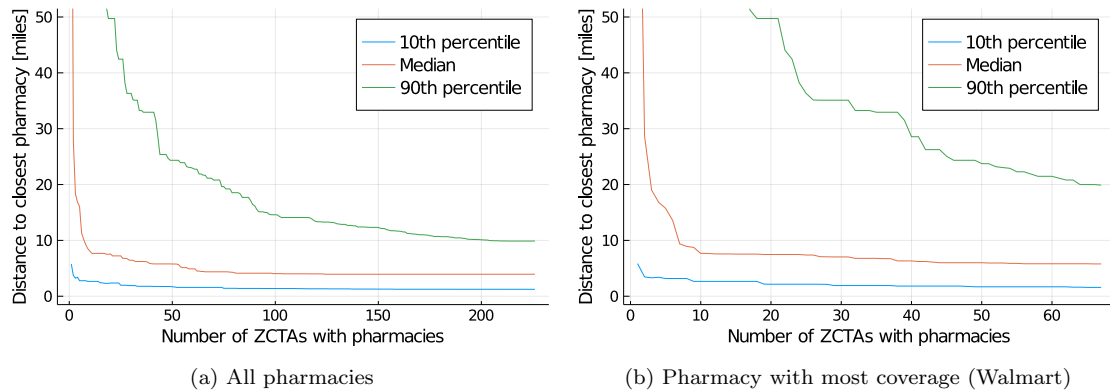

Figure B.36: Distances the population must travel (median, 10th percentile, and 90th percentile) given an optimal pharmacy selection under an increasing number of selected pharmacies. Part (a) shows all pharmacies while part (b) shows the chain with the best coverage.

Appendix B.17. Kentucky

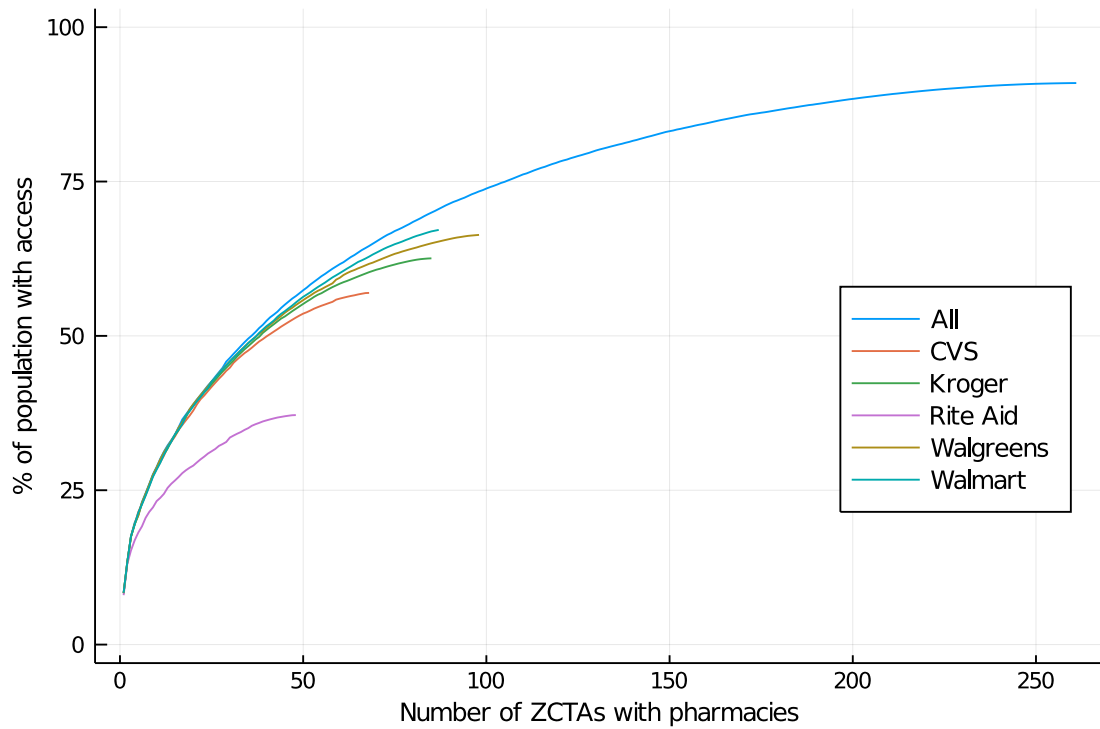

Figure B.37: Estimated fraction of the state’s population willing to travel to its closest pharmacy under an increasing maximum amount of pharmacies that administer COVID-19 testing. Results are shown for all pharmacies and for individual pharmacy chains.

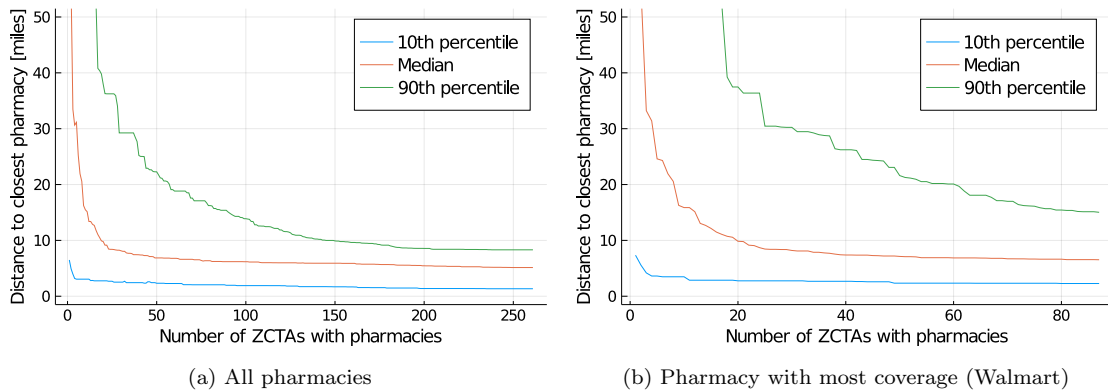

Figure B.38: Distances the population must travel (median, 10th percentile, and 90th percentile) given an optimal pharmacy selection under an increasing number of selected pharmacies. Part (a) shows all pharmacies while part (b) shows the chain with the best coverage.

Appendix B.18. Louisiana

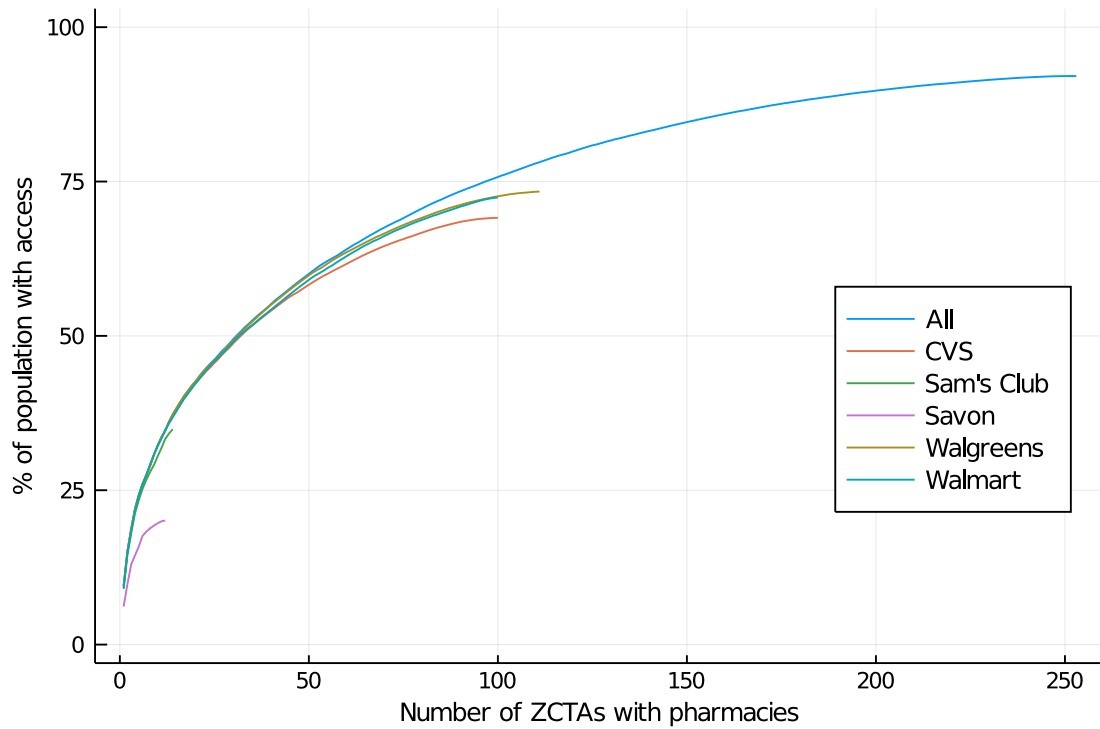

Figure B.39: Estimated fraction of the state's population willing to travel to its closest pharmacy under an increasing maximum amount of pharmacies that administer COVID-19 testing. Results are shown for all pharmacies and for individual pharmacy chains.

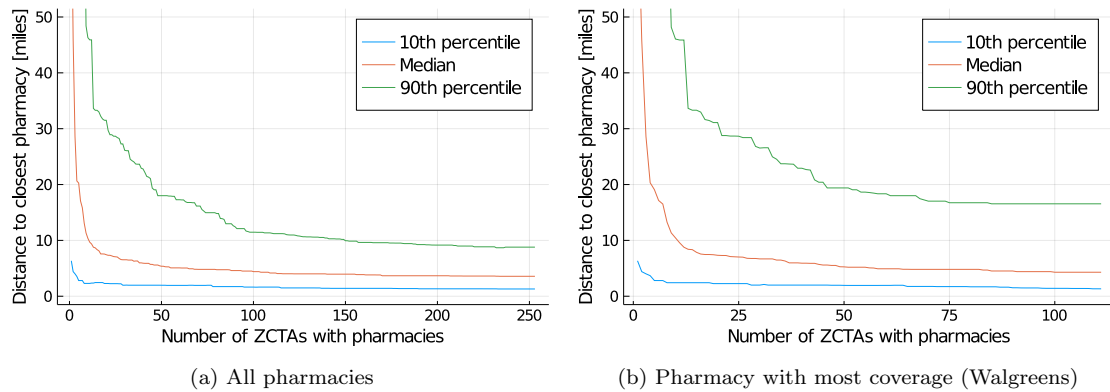

Figure B.40: Distances the population must travel (median, 10th percentile, and 90th percentile) given an optimal pharmacy selection under an increasing number of selected pharmacies. Part (a) shows all pharmacies while part (b) shows the chain with the best coverage.

Appendix B.19. Maine

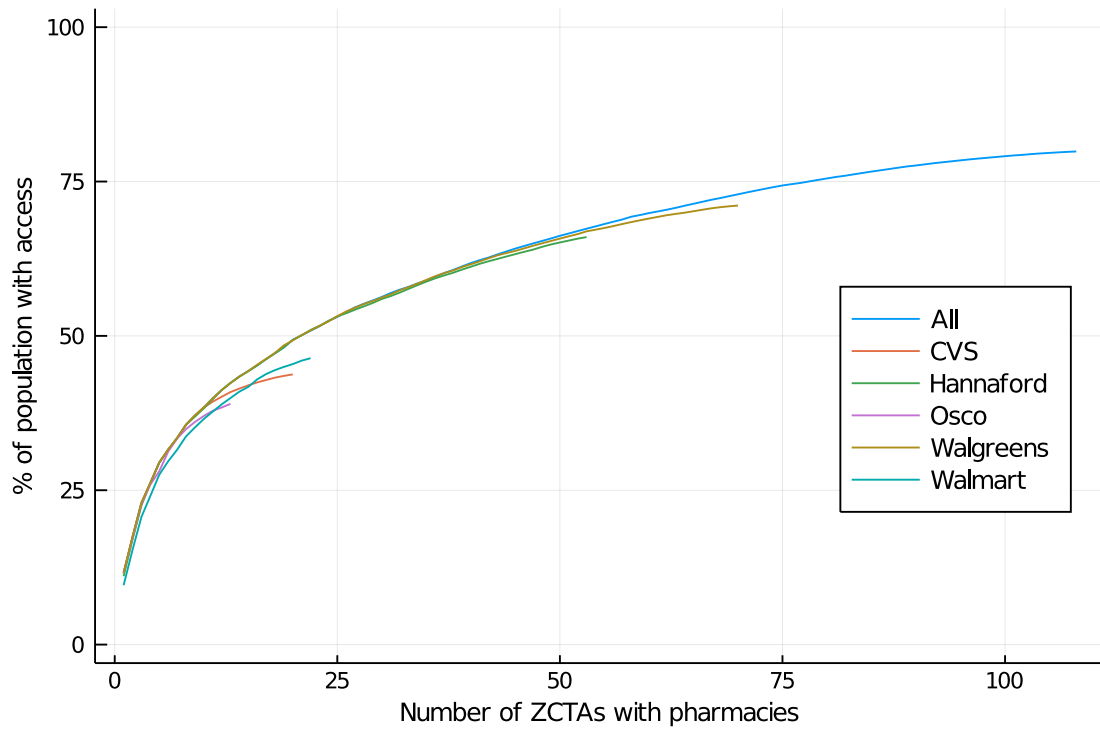

Figure B.41: Estimated fraction of the state’s population willing to travel to its closest pharmacy under an increasing maximum amount of pharmacies that administer COVID-19 testing. Results are shown for all pharmacies and for individual pharmacy chains.

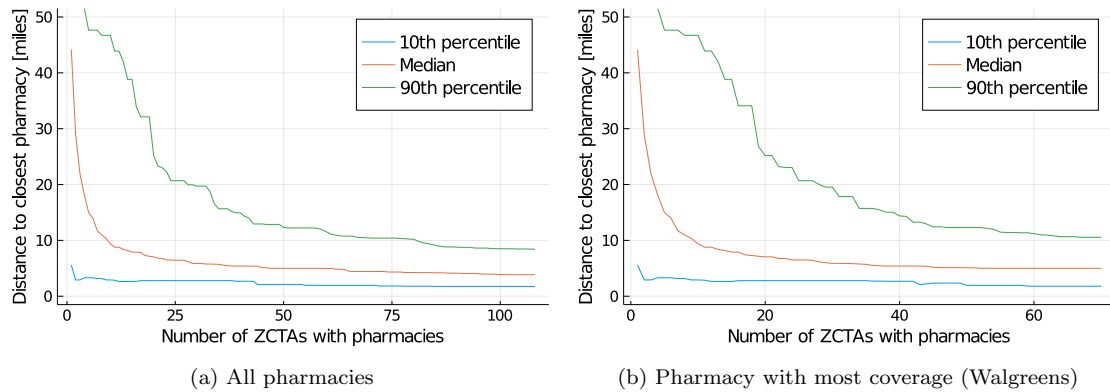

Figure B.42: Distances the population must travel (median, 10th percentile, and 90th percentile) given an optimal pharmacy selection under an increasing number of selected pharmacies. Part (a) shows all pharmacies while part (b) shows the chain with the best coverage.

Appendix B.20. Maryland

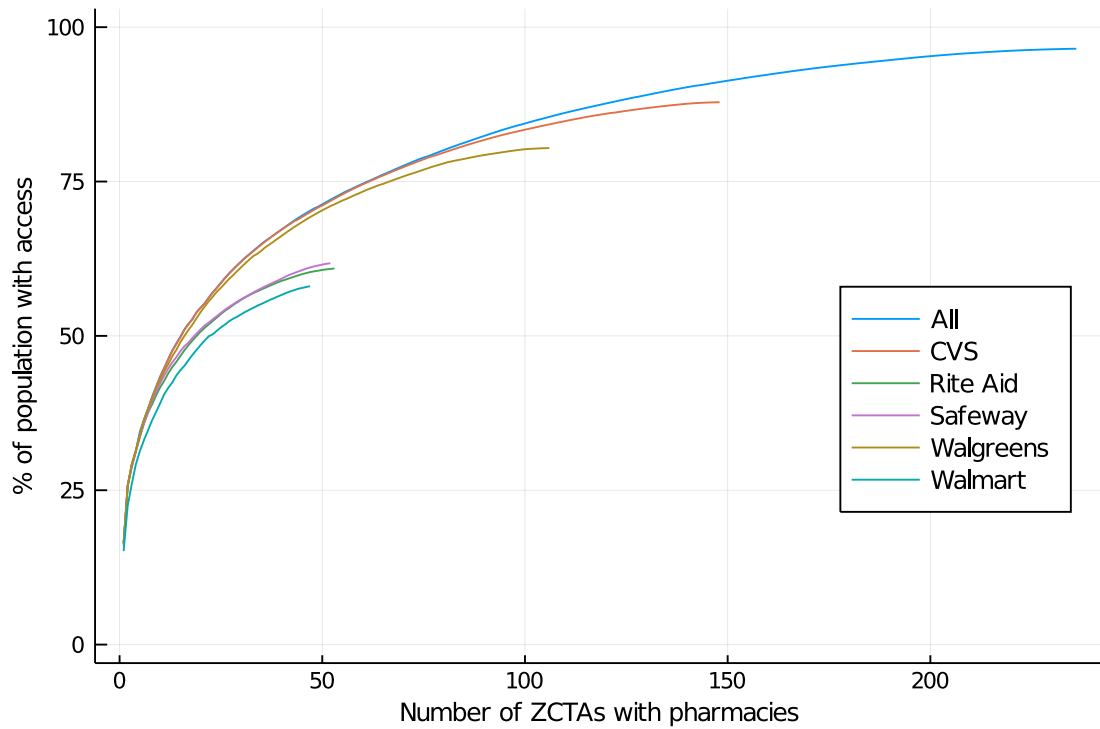

Figure B.43: Estimated fraction of the state’s population willing to travel to its closest pharmacy under an increasing maximum amount of pharmacies that administer COVID-19 testing. Results are shown for all pharmacies and for individual pharmacy chains.

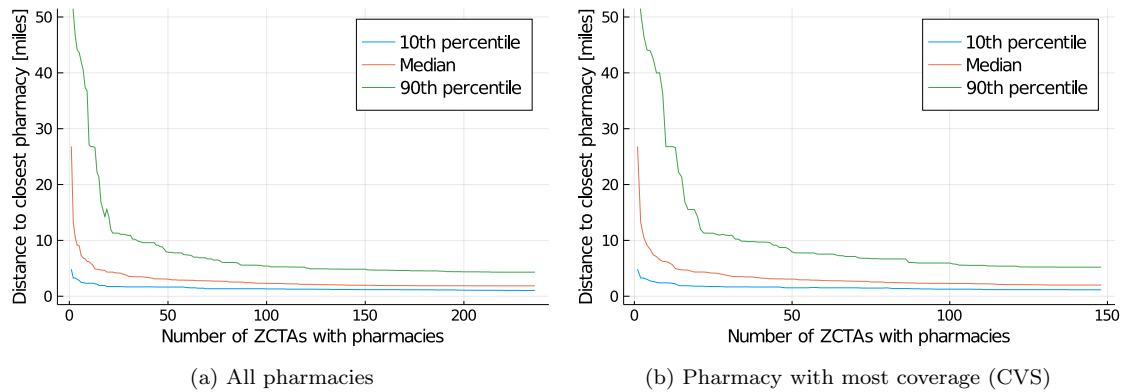

Figure B.44: Distances the population must travel (median, 10th percentile, and 90th percentile) given an optimal pharmacy selection under an increasing number of selected pharmacies. Part (a) shows all pharmacies while part (b) shows the chain with the best coverage.

Appendix B.21. Massachusetts

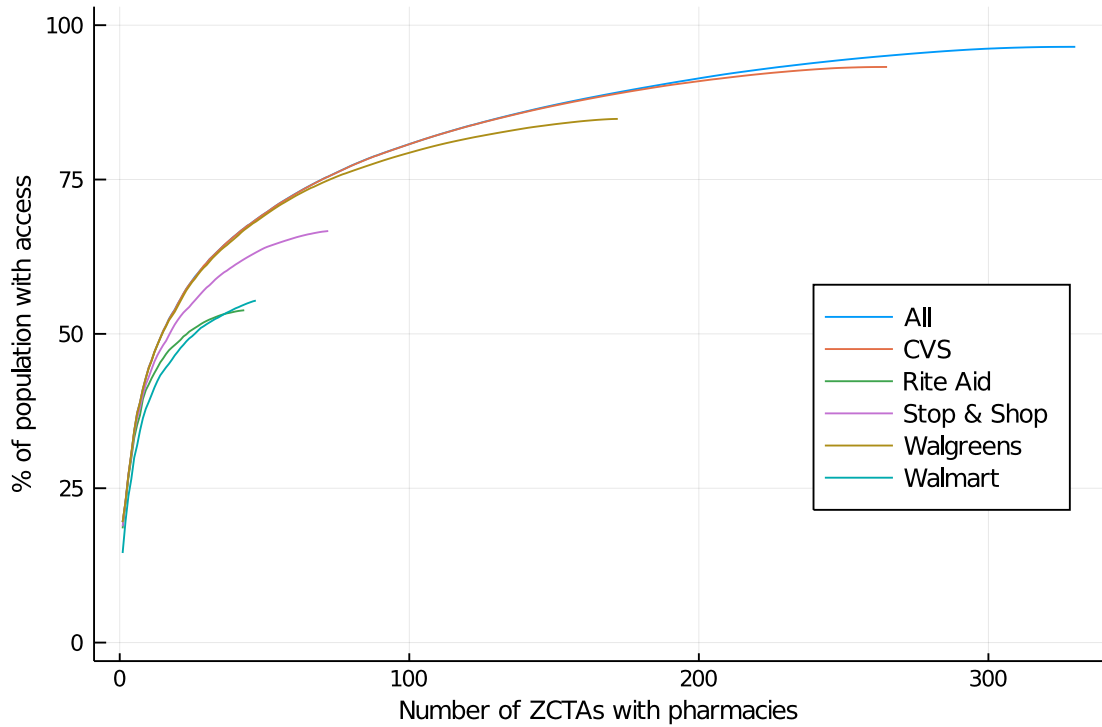

Figure B.45: Estimated fraction of the state’s population willing to travel to its closest pharmacy under an increasing maximum amount of pharmacies that administer COVID-19 testing. Results are shown for all pharmacies and for individual pharmacy chains.

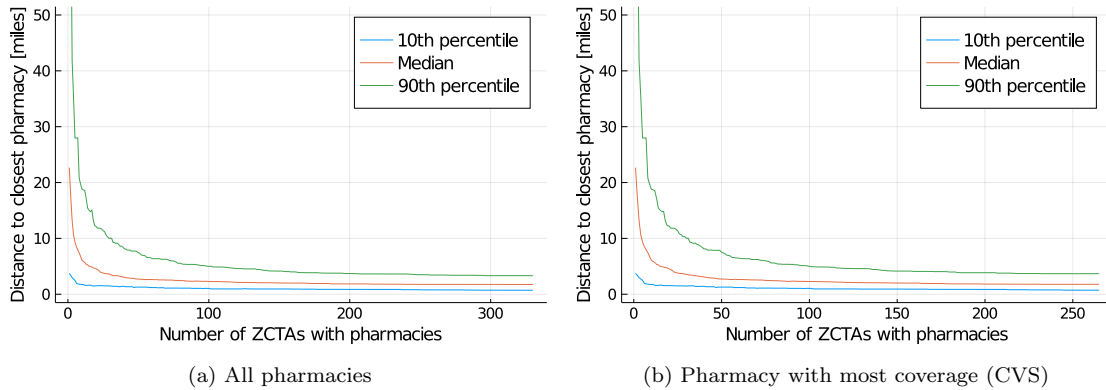

Figure B.46: Distances the population must travel (median, 10th percentile, and 90th percentile) given an optimal pharmacy selection under an increasing number of selected pharmacies. Part (a) shows all pharmacies while part (b) shows the chain with the best coverage.

Appendix B.22. Michigan

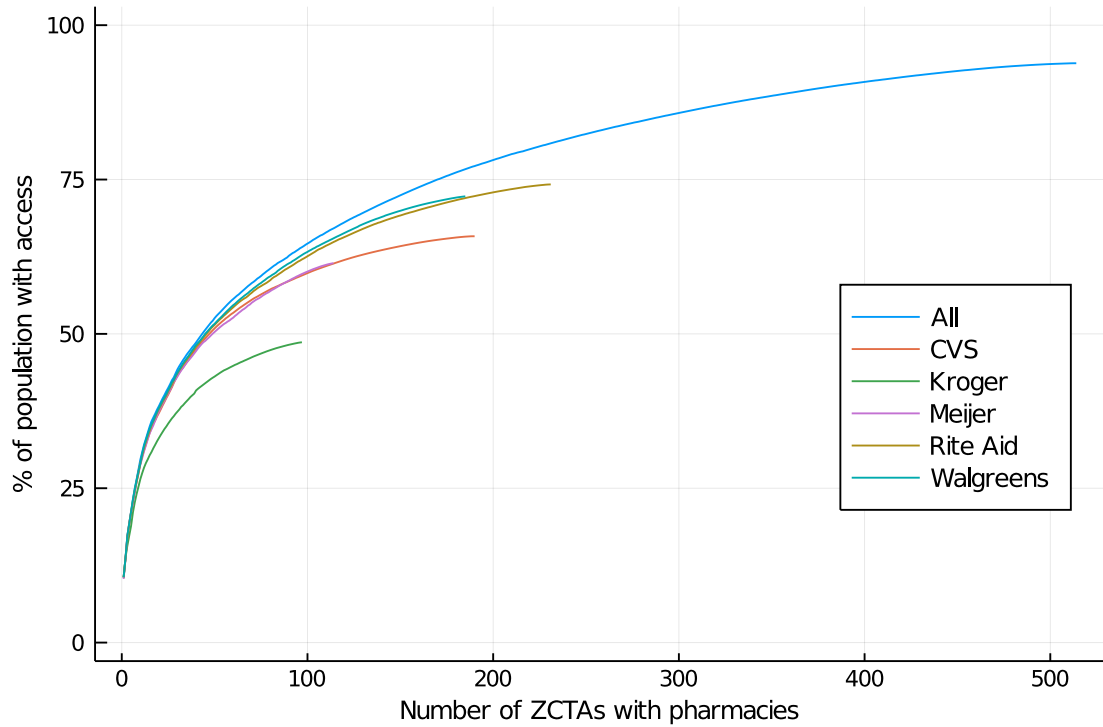

Figure B.47: Estimated fraction of the state’s population willing to travel to its closest pharmacy under an increasing maximum amount of pharmacies that administer COVID-19 testing. Results are shown for all pharmacies and for individual pharmacy chains.

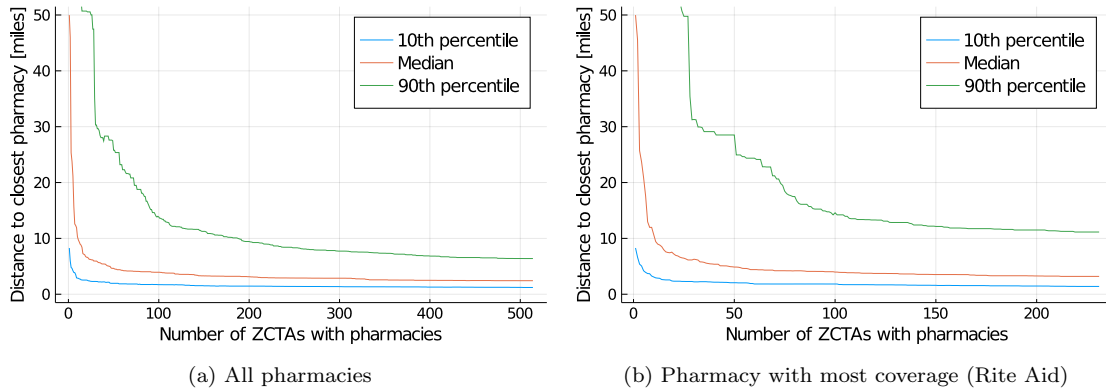

Figure B.48: Distances the population must travel (median, 10th percentile, and 90th percentile) given an optimal pharmacy selection under an increasing number of selected pharmacies. Part (a) shows all pharmacies while part (b) shows the chain with the best coverage.



Appendix B.23. Minnesota

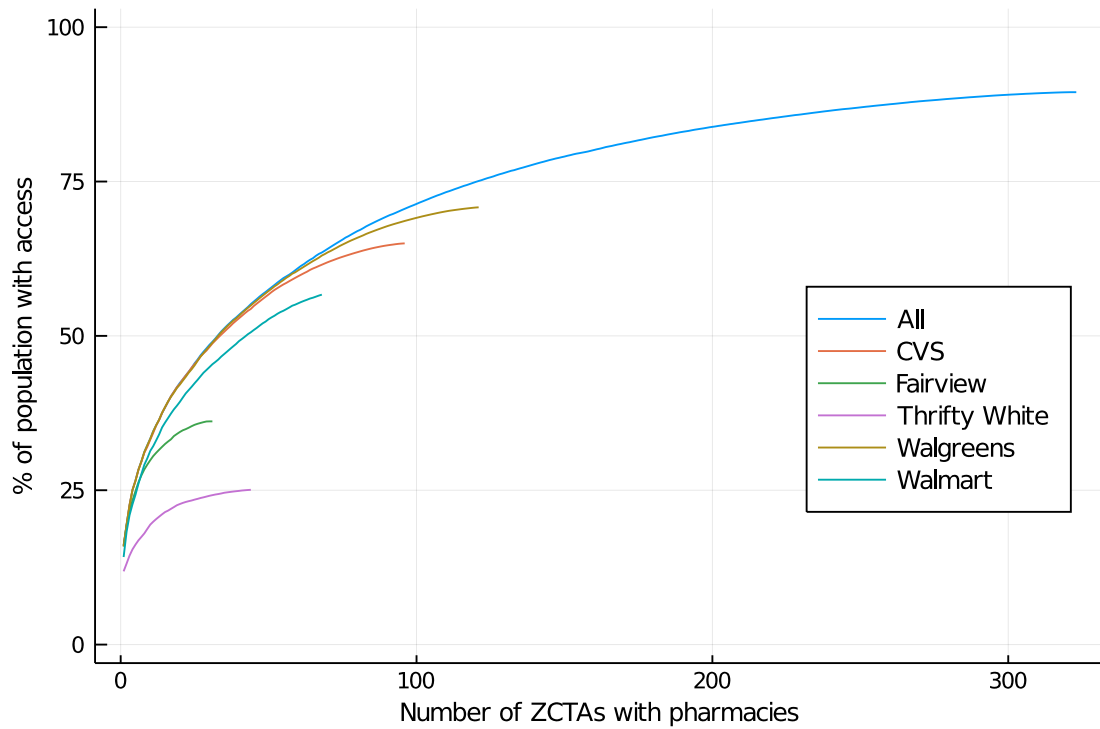

Figure B.49: Estimated fraction of the state’s population willing to travel to its closest pharmacy under an increasing maximum amount of pharmacies that administer COVID-19 testing. Results are shown for all pharmacies and for individual pharmacy chains.

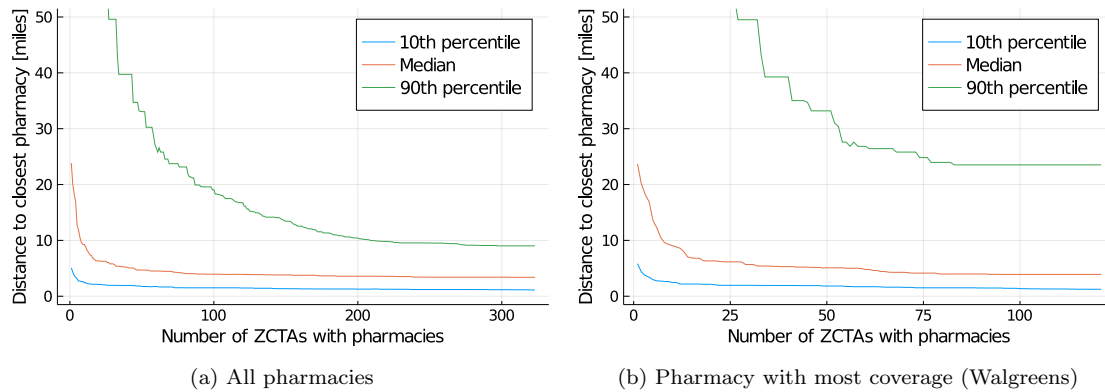

Figure B.50: Distances the population must travel (median, 10th percentile, and 90th percentile) given an optimal pharmacy selection under an increasing number of selected pharmacies. Part (a) shows all pharmacies while part (b) shows the chain with the best coverage.

Appendix B.24. Mississippi

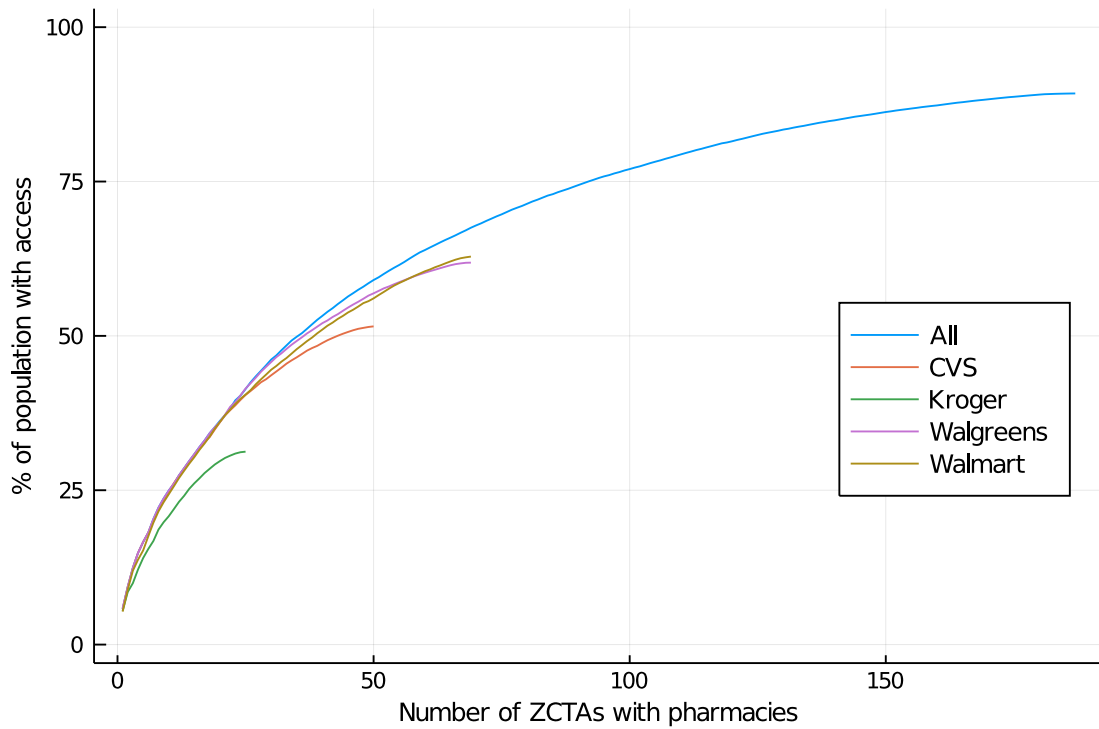

Figure B.51: Estimated fraction of the state’s population willing to travel to its closest pharmacy under an increasing maximum amount of pharmacies that administer COVID-19 testing. Results are shown for all pharmacies and for individual pharmacy chains.

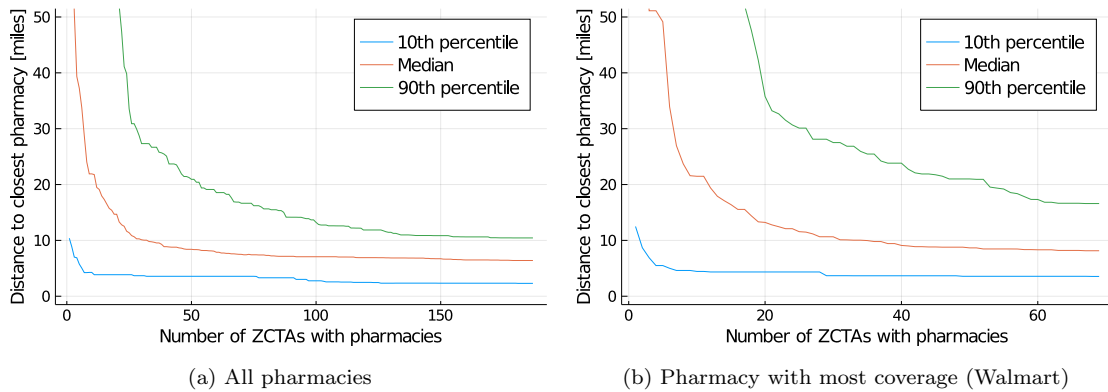

Figure B.52: Distances the population must travel (median, 10th percentile, and 90th percentile) given an optimal pharmacy selection under an increasing number of selected pharmacies. Part (a) shows all pharmacies while part (b) shows the chain with the best coverage.

Appendix B.25. Missouri

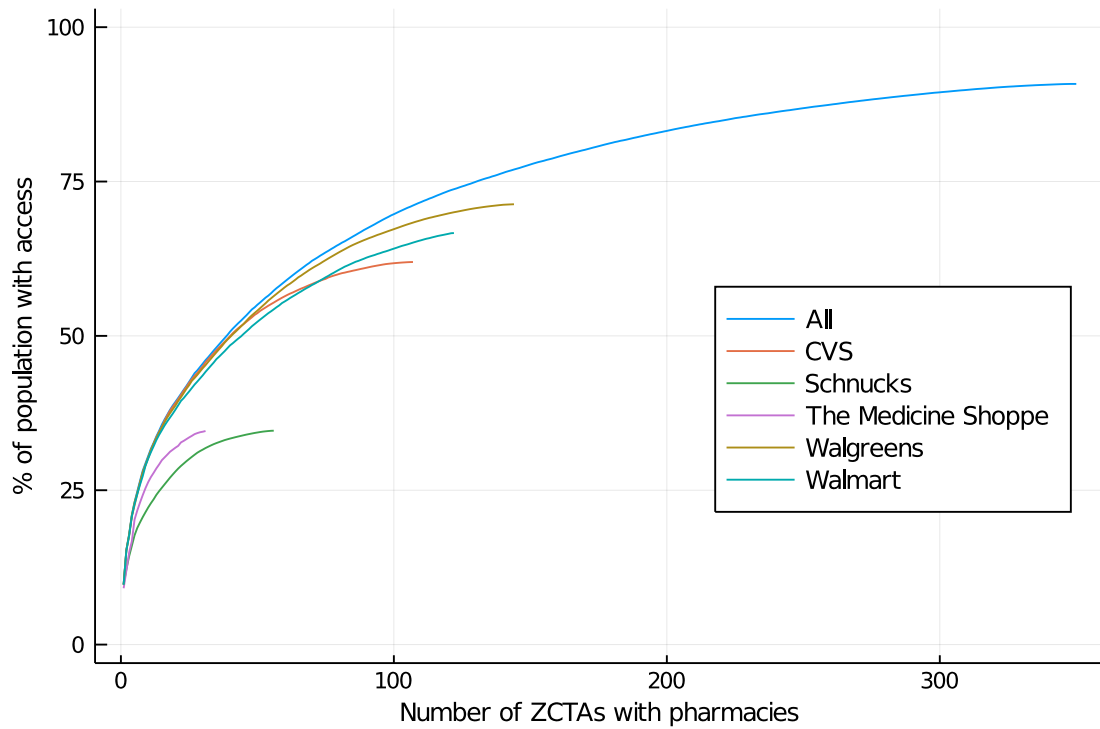

Figure B.53: Estimated fraction of the state’s population willing to travel to its closest pharmacy under an increasing maximum amount of pharmacies that administer COVID-19 testing. Results are shown for all pharmacies and for individual pharmacy chains.

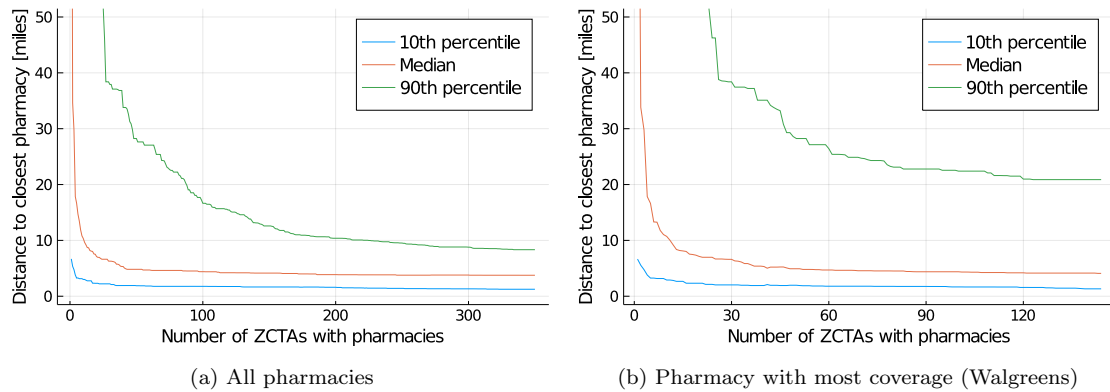

Figure B.54: Distances the population must travel (median, 10th percentile, and 90th percentile) given an optimal pharmacy selection under an increasing number of selected pharmacies. Part (a) shows all pharmacies while part (b) shows the chain with the best coverage.

Appendix B.26. Montana

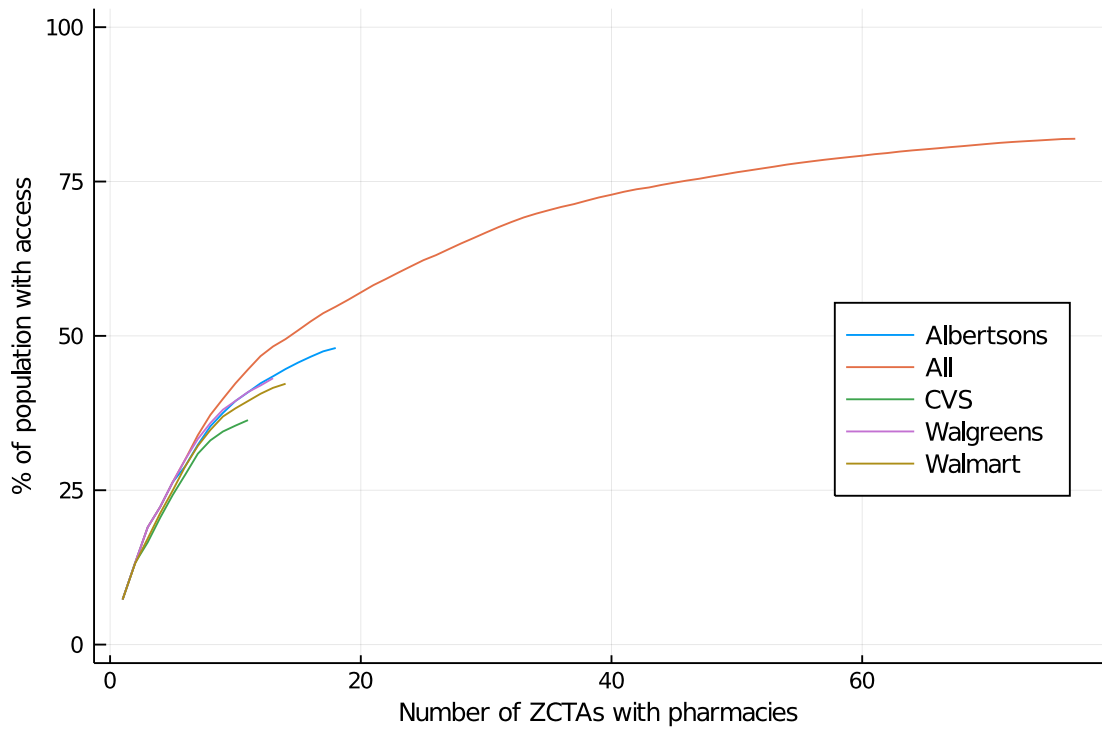

Figure B.55: Estimated fraction of the state’s population willing to travel to its closest pharmacy under an increasing maximum amount of pharmacies that administer COVID-19 testing. Results are shown for all pharmacies and for individual pharmacy chains.

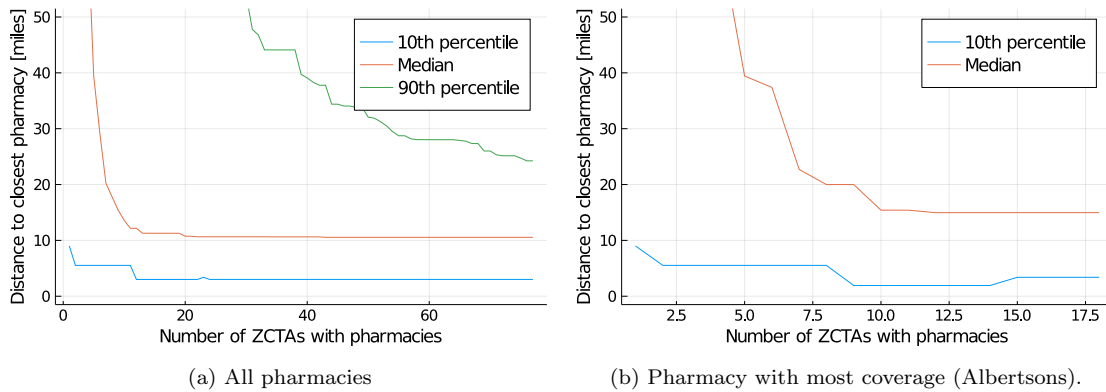

Figure B.56: Distances the population must travel (median, 10th percentile, and 90th percentile) given an optimal pharmacy selection under an increasing number of selected pharmacies. Part (a) shows all pharmacies while part (b) shows the chain with the best coverage. Note: the 90th percentile of the travel distances for part (b) exceed 50 miles.

Appendix B.27. Nebraska

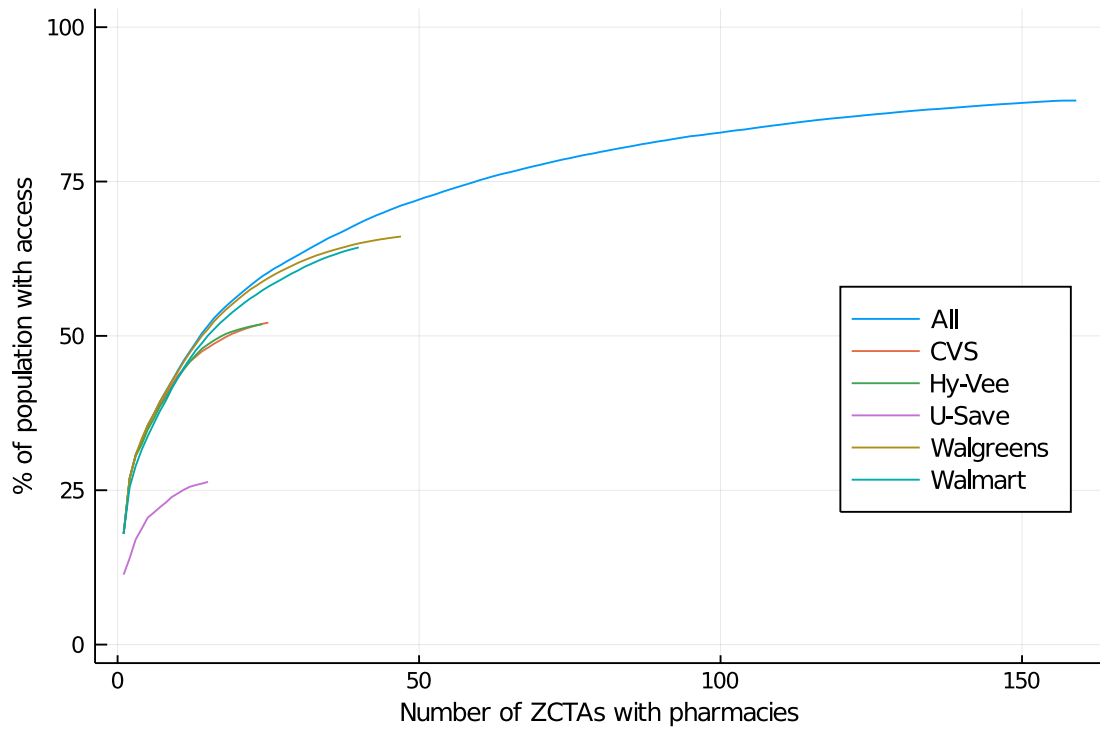

Figure B.57: Estimated fraction of the state’s population willing to travel to its closest pharmacy under an increasing maximum amount of pharmacies that administer COVID-19 testing. Results are shown for all pharmacies and for individual pharmacy chains.

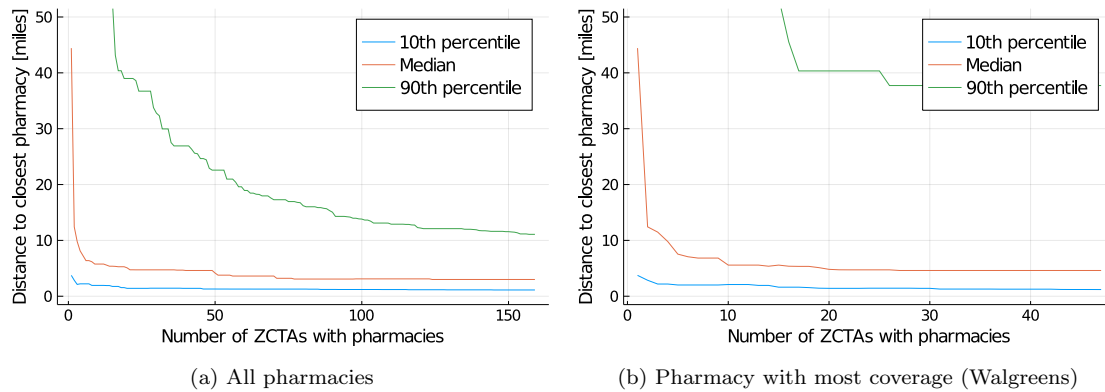

Figure B.58: Distances the population must travel (median, 10th percentile, and 90th percentile) given an optimal pharmacy selection under an increasing number of selected pharmacies. Part (a) shows all pharmacies while part (b) shows the chain with the best coverage.

Appendix B.28. Nevada

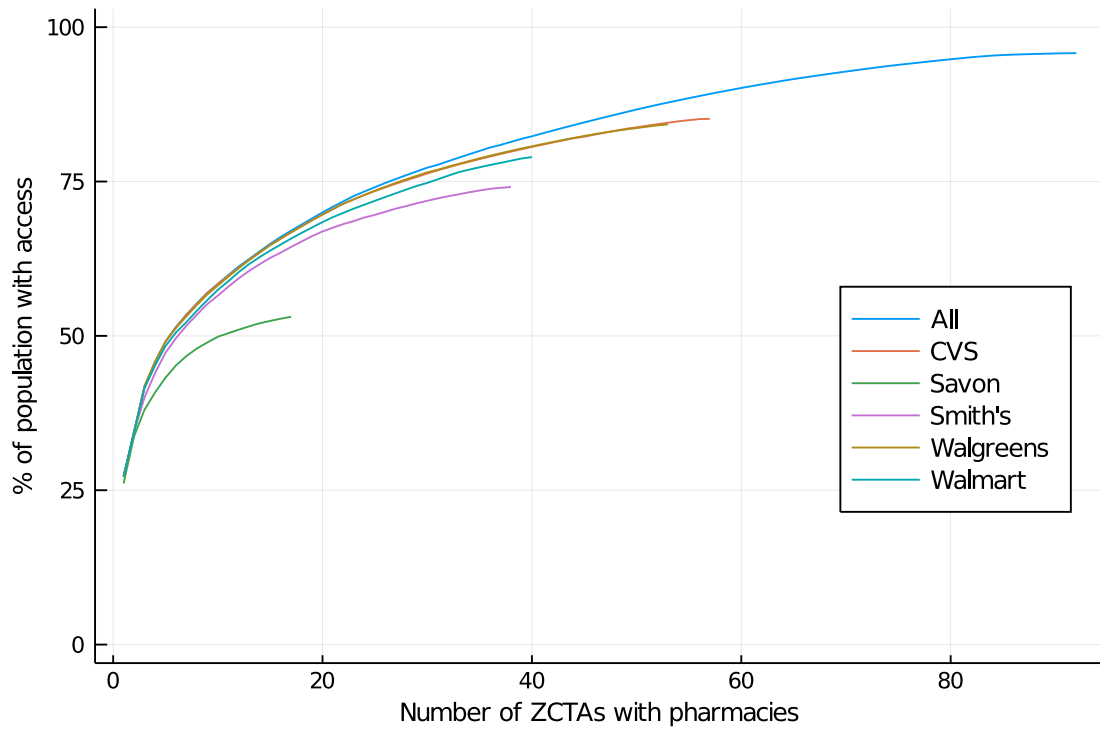

Figure B.59: Estimated fraction of the state’s population willing to travel to its closest pharmacy under an increasing maximum amount of pharmacies that administer COVID-19 testing. Results are shown for all pharmacies and for individual pharmacy chains.

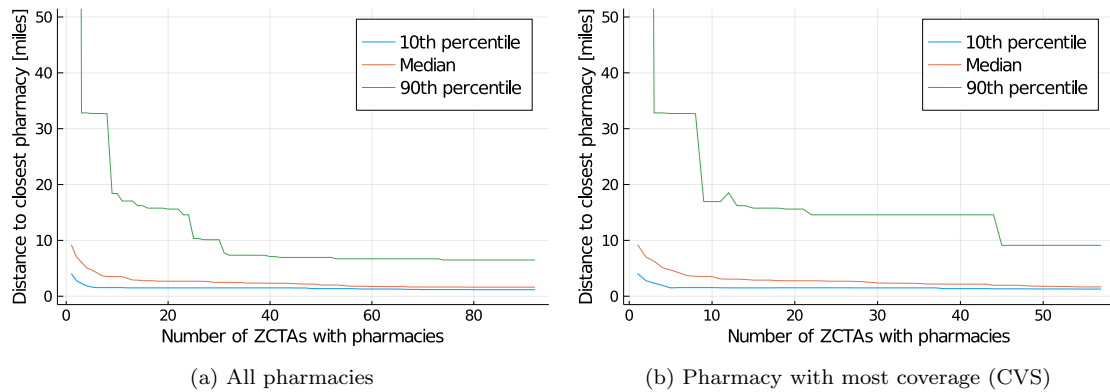

Figure B.60: Distances the population must travel (median, 10th percentile, and 90th percentile) given an optimal pharmacy selection under an increasing number of selected pharmacies. Part (a) shows all pharmacies while part (b) shows the chain with the best coverage.

Appendix B.29. New Hampshire

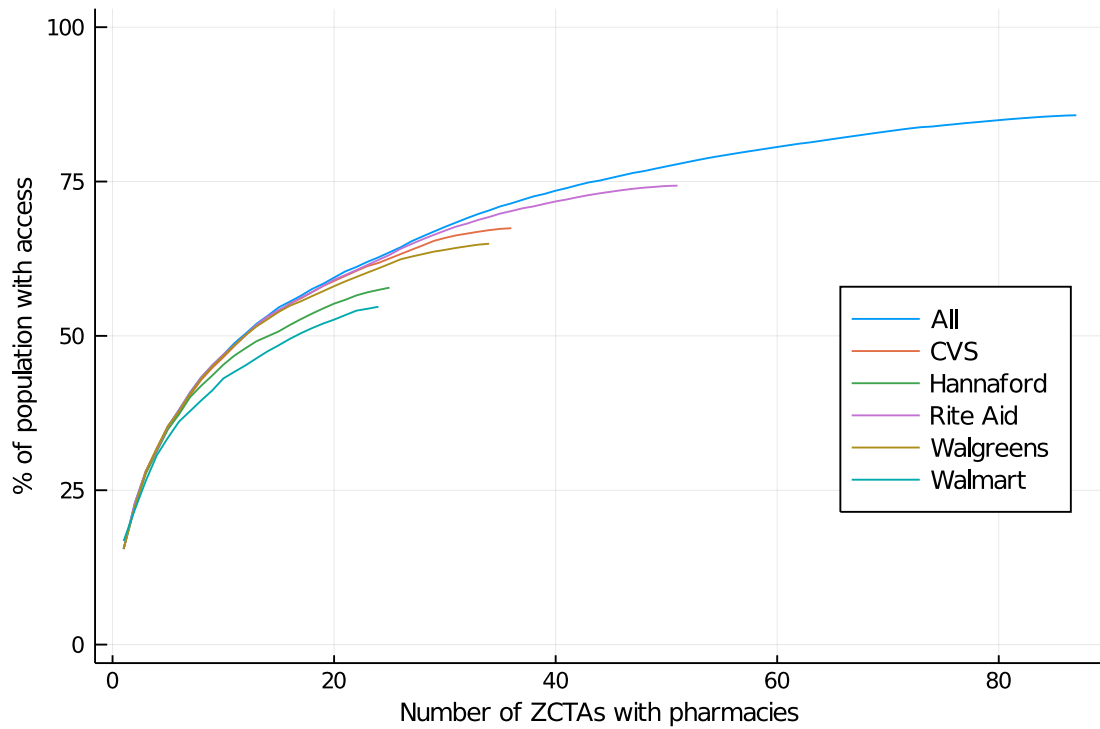

Figure B.61: Estimated fraction of the state’s population willing to travel to its closest pharmacy under an increasing maximum amount of pharmacies that administer COVID-19 testing. Results are shown for all pharmacies and for individual pharmacy chains.

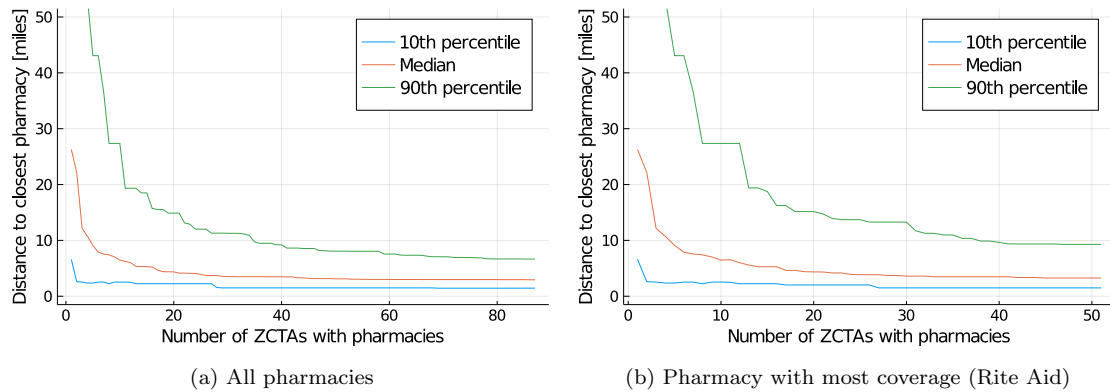

Figure B.62: Distances the population must travel (median, 10th percentile, and 90th percentile) given an optimal pharmacy selection under an increasing number of selected pharmacies. Part (a) shows all pharmacies while part (b) shows the chain with the best coverage.

Appendix B.30. New Jersey

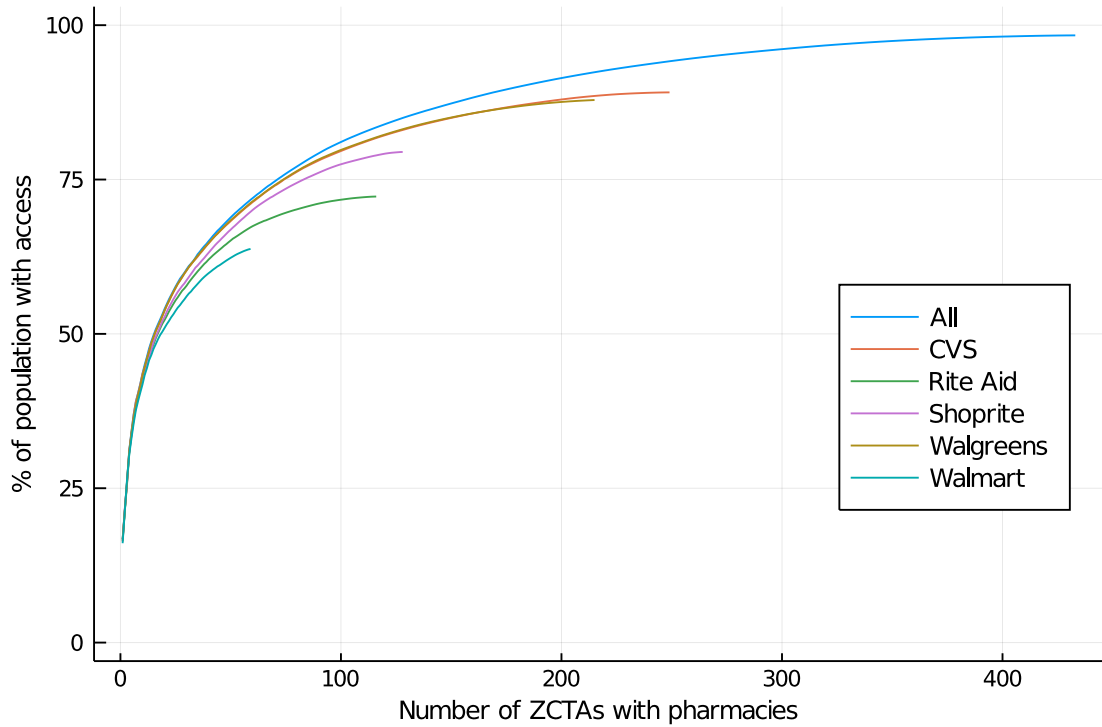

Figure B.63: Estimated fraction of the state’s population willing to travel to its closest pharmacy under an increasing maximum amount of pharmacies that administer COVID-19 testing. Results are shown for all pharmacies and for individual pharmacy chains.

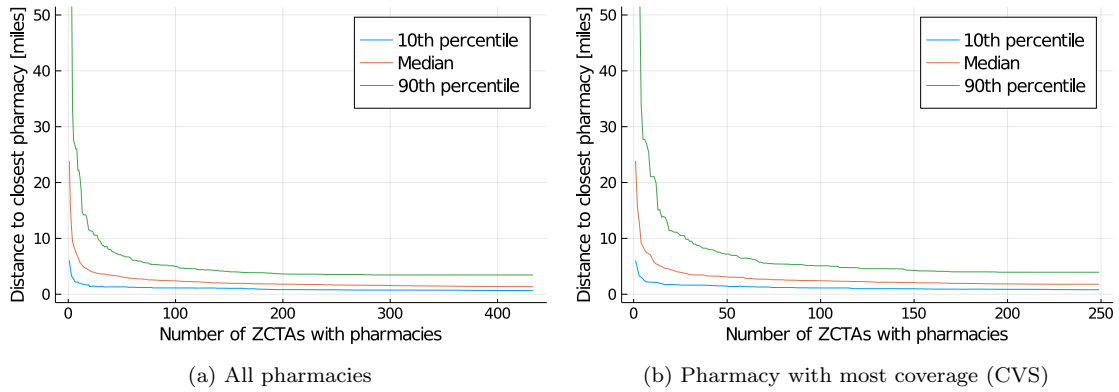

Figure B.64: Distances the population must travel (median, 10th percentile, and 90th percentile) given an optimal pharmacy selection under an increasing number of selected pharmacies. Part (a) shows all pharmacies while part (b) shows the chain with the best coverage.



Appendix B.31. New Mexico

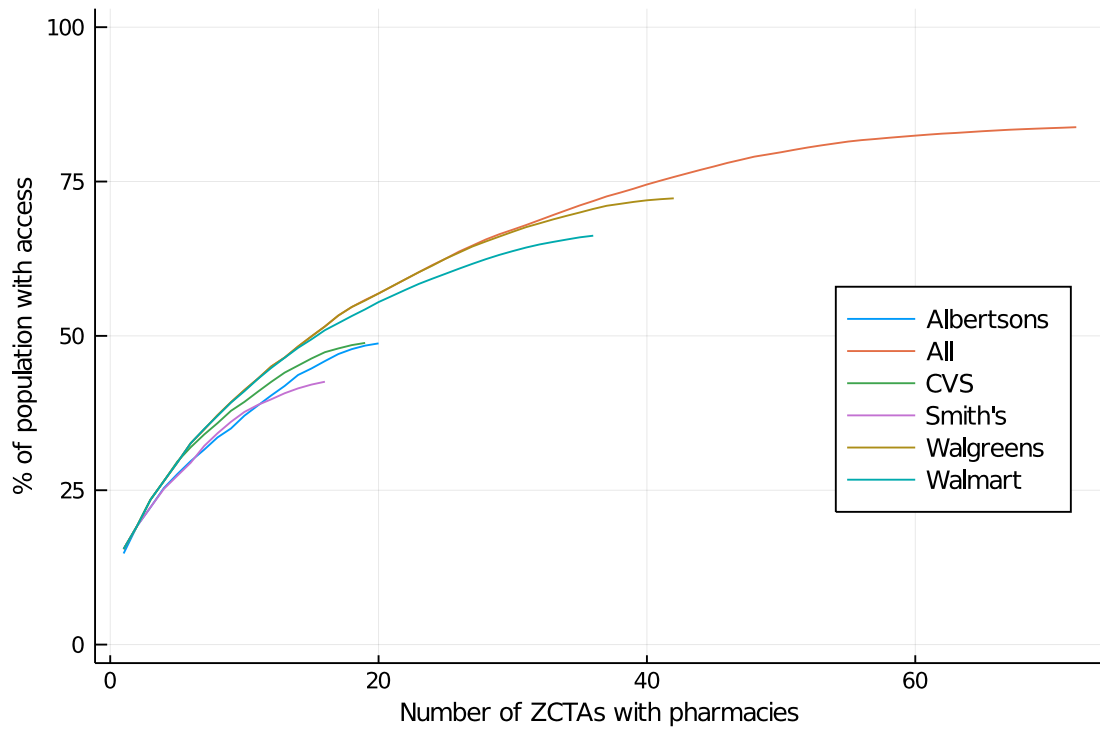

Figure B.65: Estimated fraction of the state’s population willing to travel to its closest pharmacy under an increasing maximum amount of pharmacies that administer COVID-19 testing. Results are shown for all pharmacies and for individual pharmacy chains.

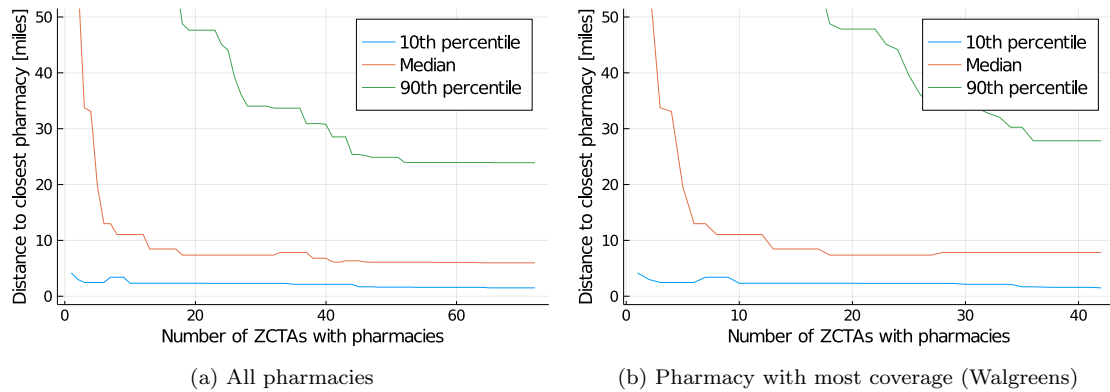

Figure B.66: Distances the population must travel (median, 10th percentile, and 90th percentile) given an optimal pharmacy selection under an increasing number of selected pharmacies. Part (a) shows all pharmacies while part (b) shows the chain with the best coverage.

Appendix B.32. New York

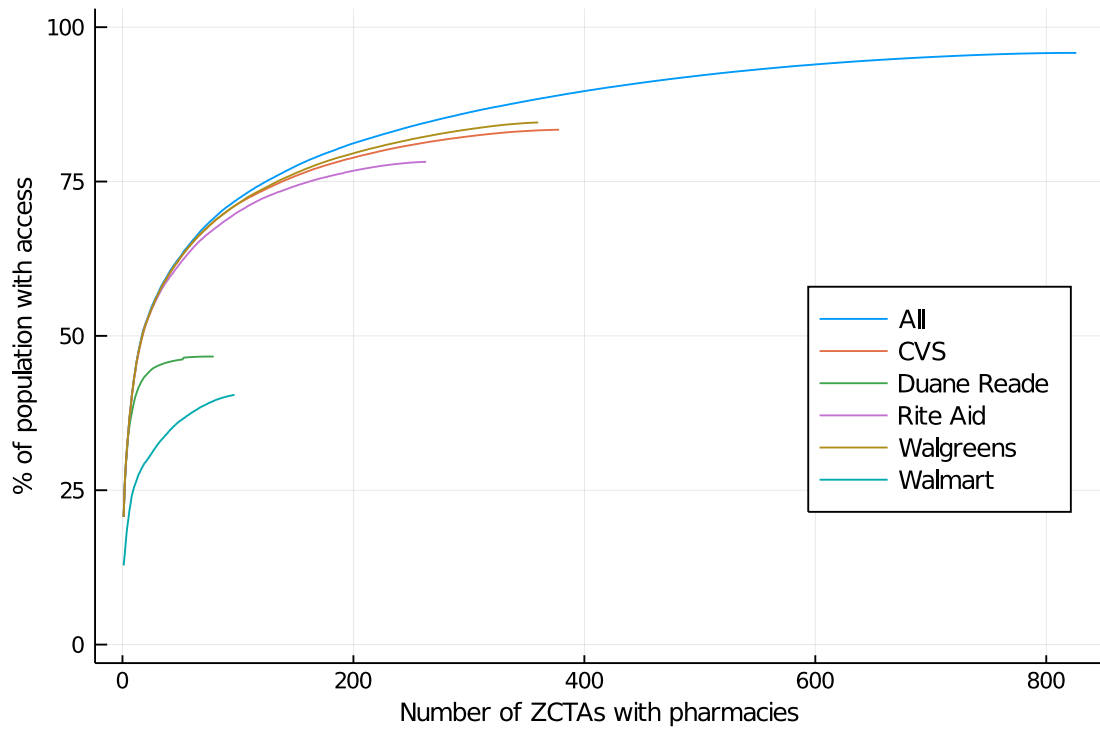

Figure B.67: Estimated fraction of the state’s population willing to travel to its closest pharmacy under an increasing maximum amount of pharmacies that administer COVID-19 testing. Results are shown for all pharmacies and for individual pharmacy chains.

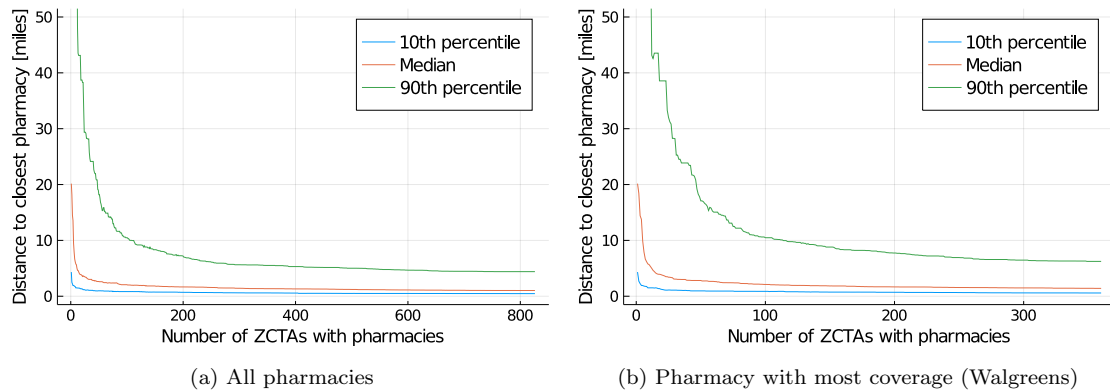

Figure B.68: Distances the population must travel (median, 10th percentile, and 90th percentile) given an optimal pharmacy selection under an increasing number of selected pharmacies. Part (a) shows all pharmacies while part (b) shows the chain with the best coverage.

Appendix B.33. North Carolina

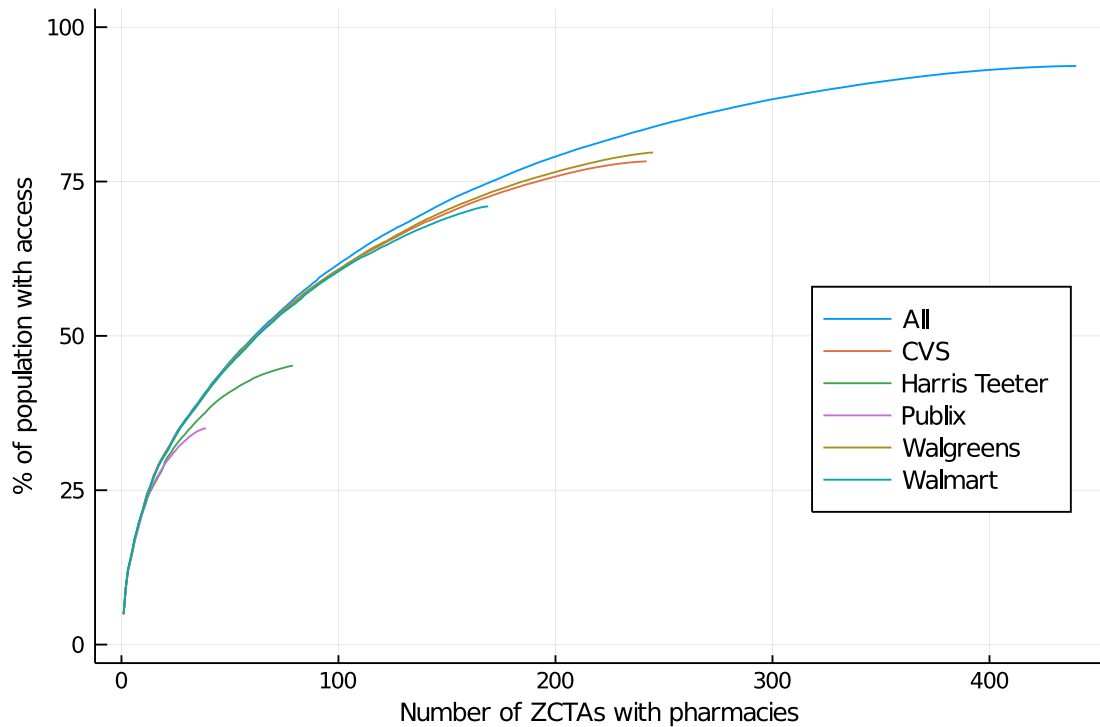

Figure B.69: Estimated fraction of the state’s population willing to travel to its closest pharmacy under an increasing maximum amount of pharmacies that administer COVID-19 testing. Results are shown for all pharmacies and for individual pharmacy chains.

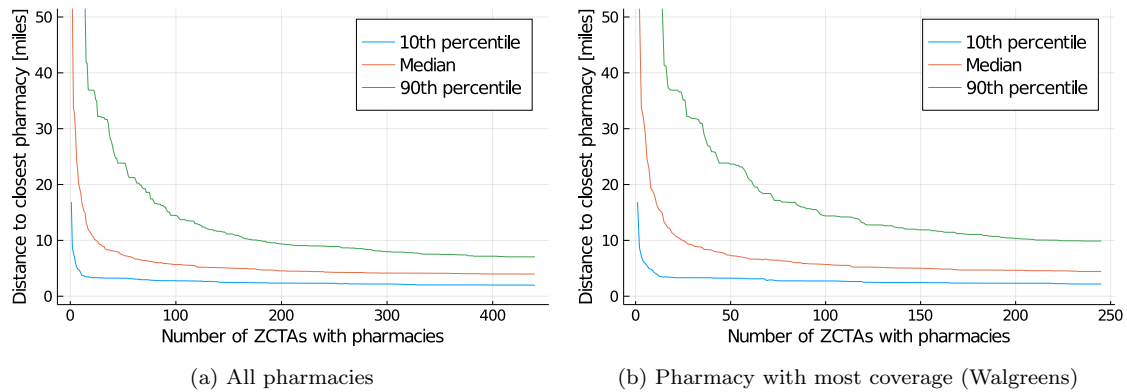

Figure B.70: Distances the population must travel (median, 10th percentile, and 90th percentile) given an optimal pharmacy selection under an increasing number of selected pharmacies. Part (a) shows all pharmacies while part (b) shows the chain with the best coverage.

Appendix B.34. North Dakota

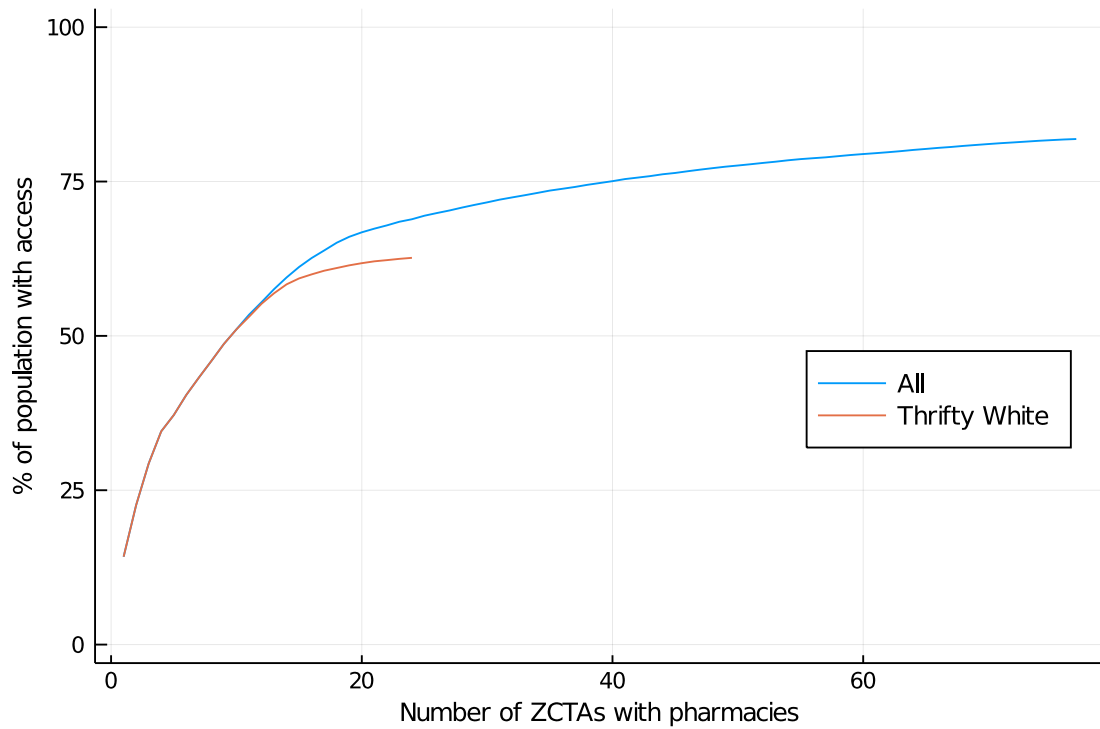

Figure B.71: Estimated fraction of the state’s population willing to travel to its closest pharmacy under an increasing maximum amount of pharmacies that administer COVID-19 testing. Results are shown for all pharmacies and for individual pharmacy chains.

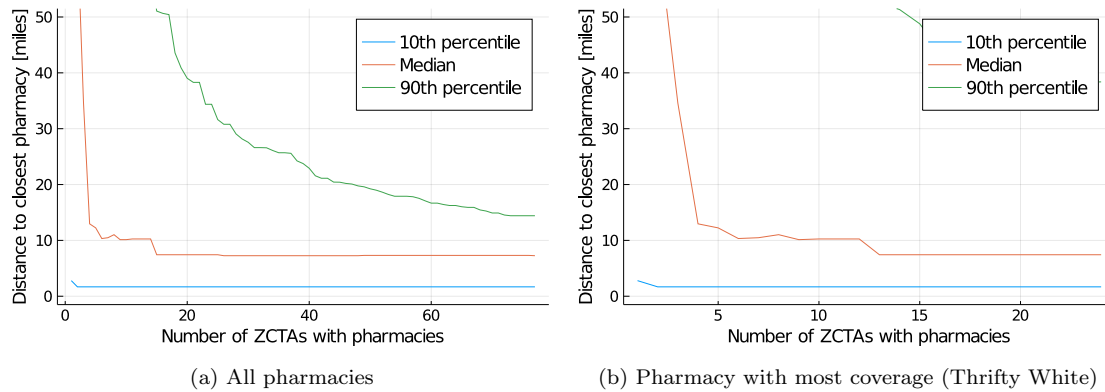

Figure B.72: Distances the population must travel (median, 10th percentile, and 90th percentile) given an optimal pharmacy selection under an increasing number of selected pharmacies. Part (a) shows all pharmacies while part (b) shows the chain with the best coverage.

Appendix B.35. Ohio

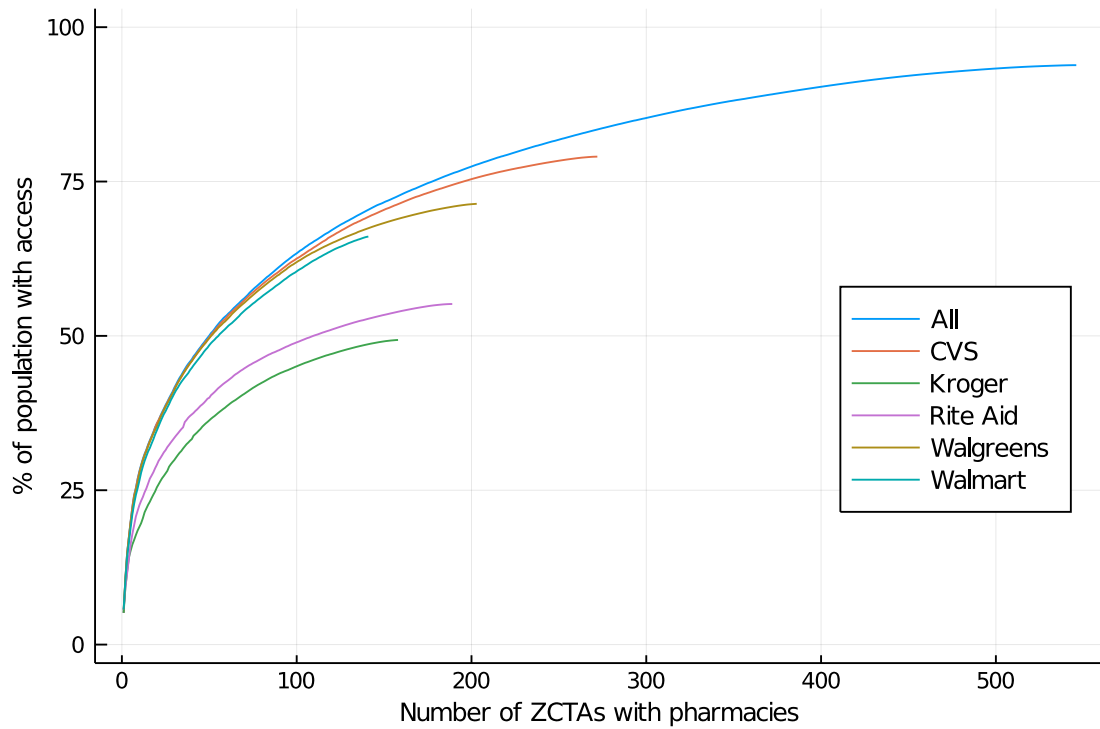

Figure B.73: Estimated fraction of the state’s population willing to travel to its closest pharmacy under an increasing maximum amount of pharmacies that administer COVID-19 testing. Results are shown for all pharmacies and for individual pharmacy chains.

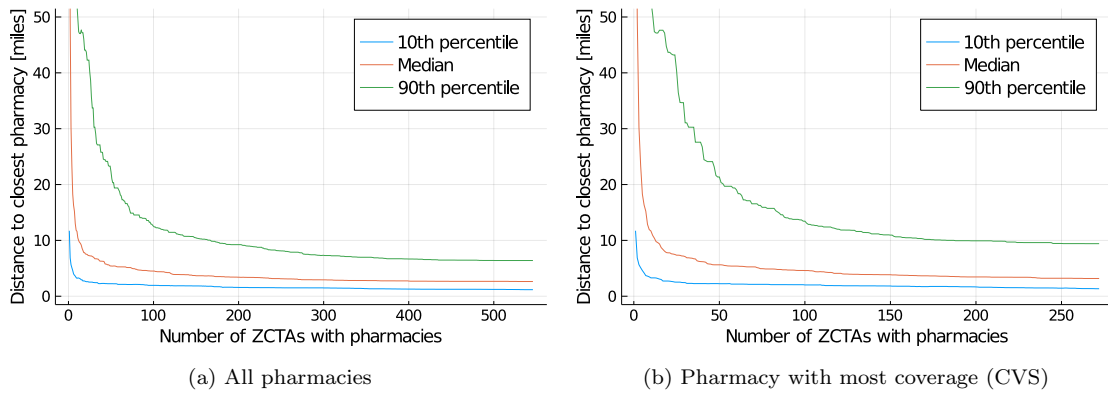

Figure B.74: Distances the population must travel (median, 10th percentile, and 90th percentile) given an optimal pharmacy selection under an increasing number of selected pharmacies. Part (a) shows all pharmacies while part (b) shows the chain with the best coverage.

Appendix B.36. Oklahoma

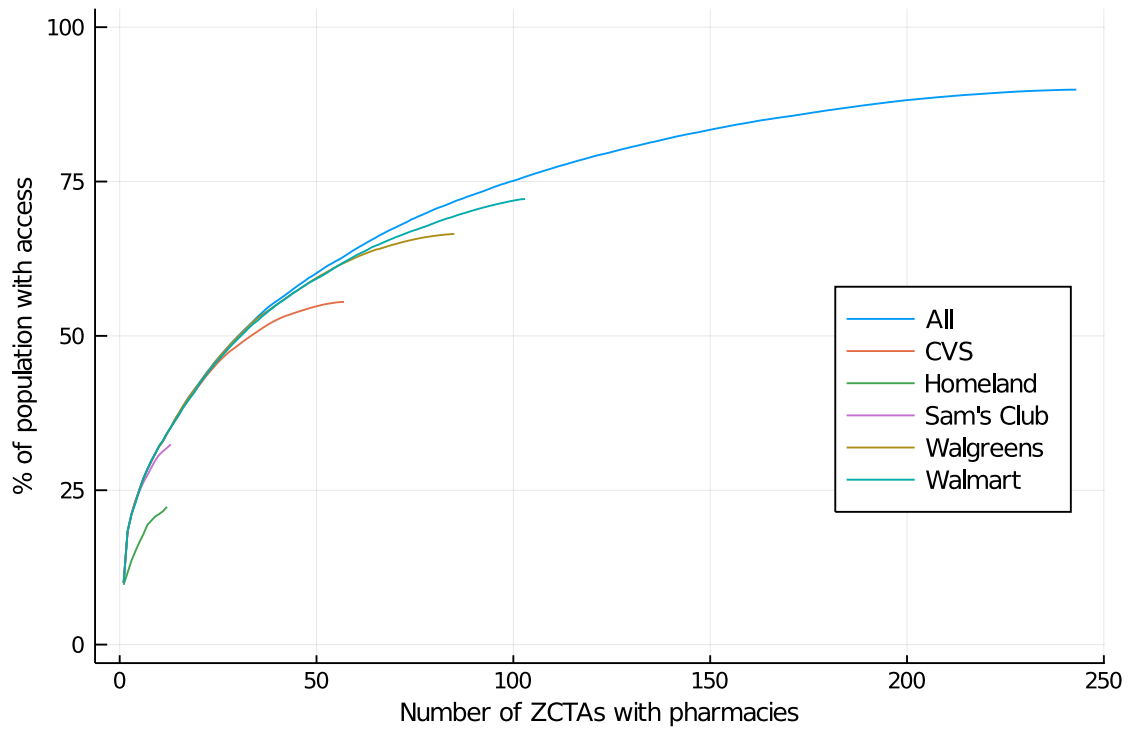

Figure B.75: Estimated fraction of the state’s population willing to travel to its closest pharmacy under an increasing maximum amount of pharmacies that administer COVID-19 testing. Results are shown for all pharmacies and for individual pharmacy chains.

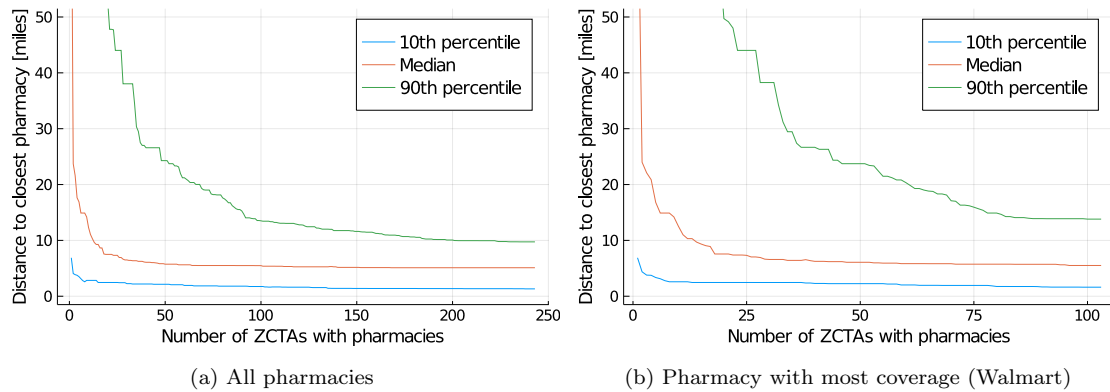

Figure B.76: Distances the population must travel (median, 10th percentile, and 90th percentile) given an optimal pharmacy selection under an increasing number of selected pharmacies. Part (a) shows all pharmacies while part (b) shows the chain with the best coverage.

Appendix B.37. Oregon

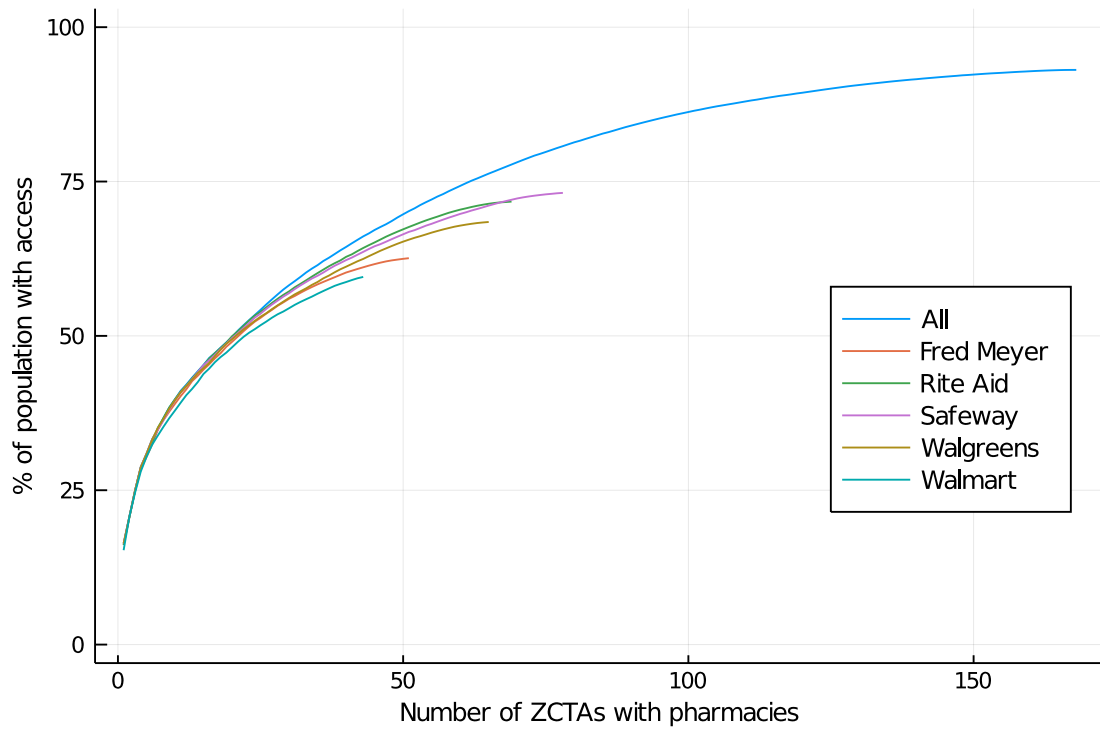

Figure B.77: Estimated fraction of the state’s population willing to travel to its closest pharmacy under an increasing maximum amount of pharmacies that administer COVID-19 testing. Results are shown for all pharmacies and for individual pharmacy chains.

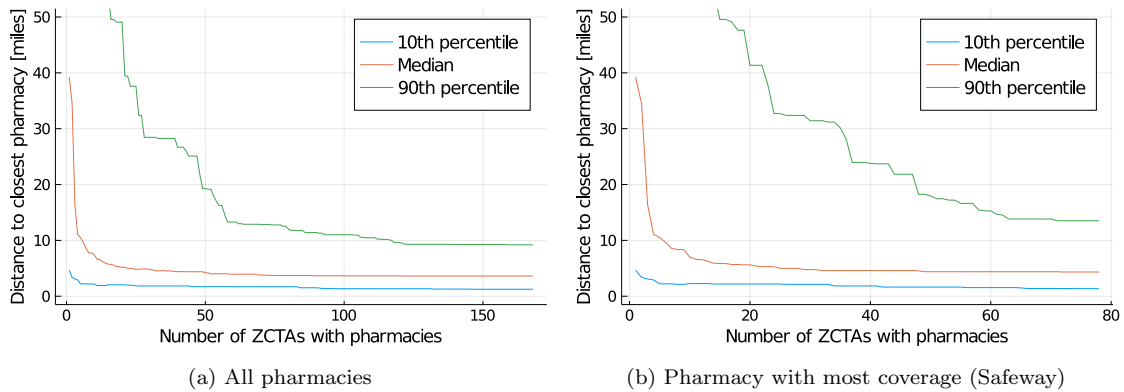

Figure B.78: Distances the population must travel (median, 10th percentile, and 90th percentile) given an optimal pharmacy selection under an increasing number of selected pharmacies. Part (a) shows all pharmacies while part (b) shows the chain with the best coverage.

Appendix B.38. Pennsylvania

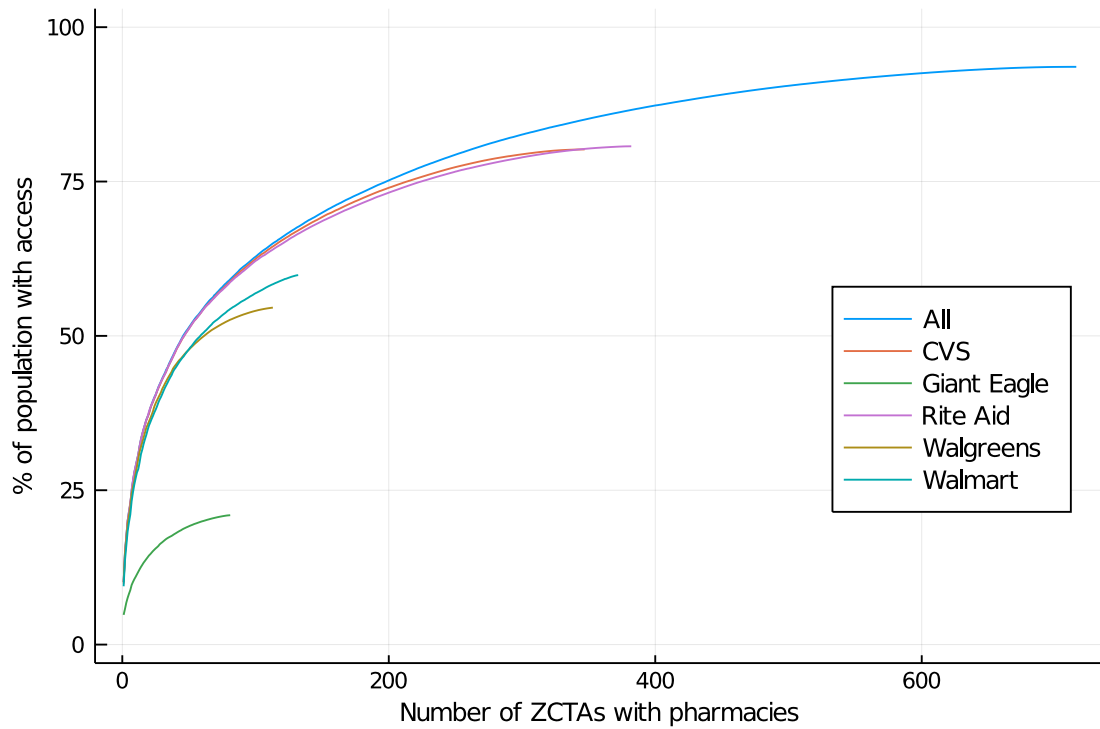

Figure B.79: Estimated fraction of the state’s population willing to travel to its closest pharmacy under an increasing maximum amount of pharmacies that administer COVID-19 testing. Results are shown for all pharmacies and for individual pharmacy chains.

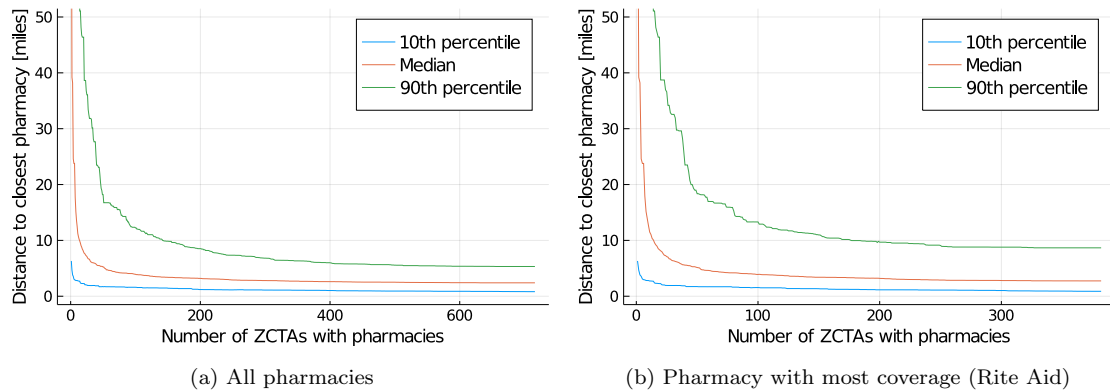

Figure B.80: Distances the population must travel (median, 10th percentile, and 90th percentile) given an optimal pharmacy selection under an increasing number of selected pharmacies. Part (a) shows all pharmacies while part (b) shows the chain with the best coverage.



Appendix B.39. Rhode Island

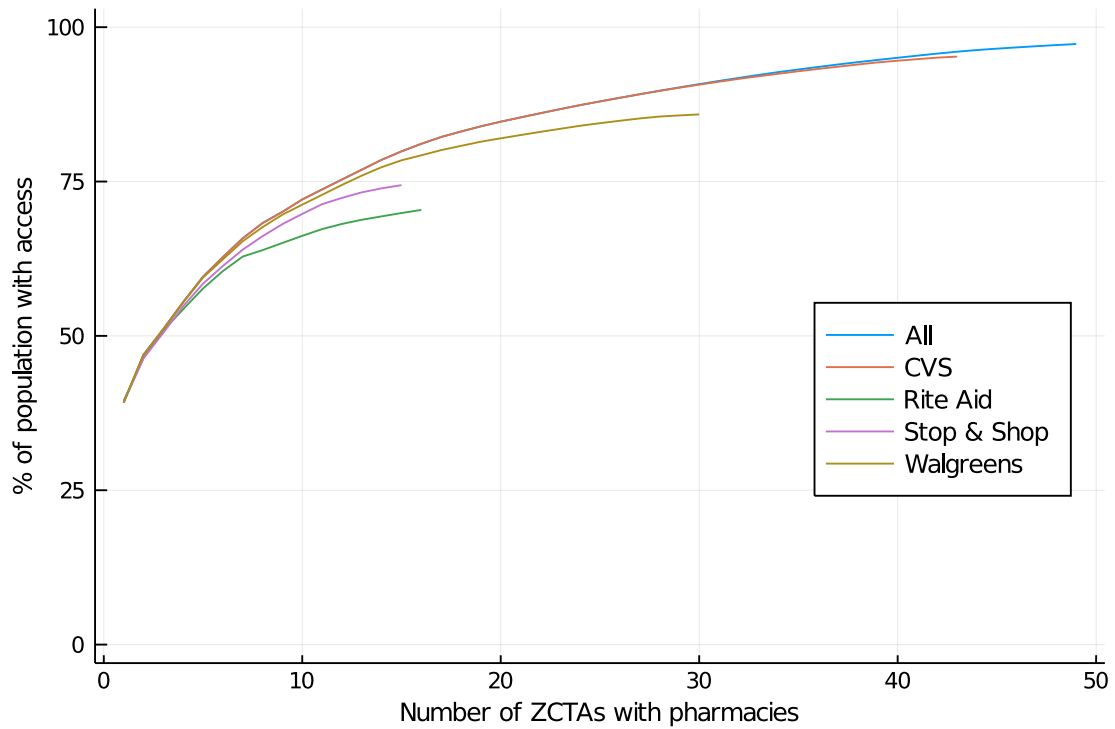

Figure B.81: Estimated fraction of the state’s population willing to travel to its closest pharmacy under an increasing maximum amount of pharmacies that administer COVID-19 testing. Results are shown for all pharmacies and for individual pharmacy chains.

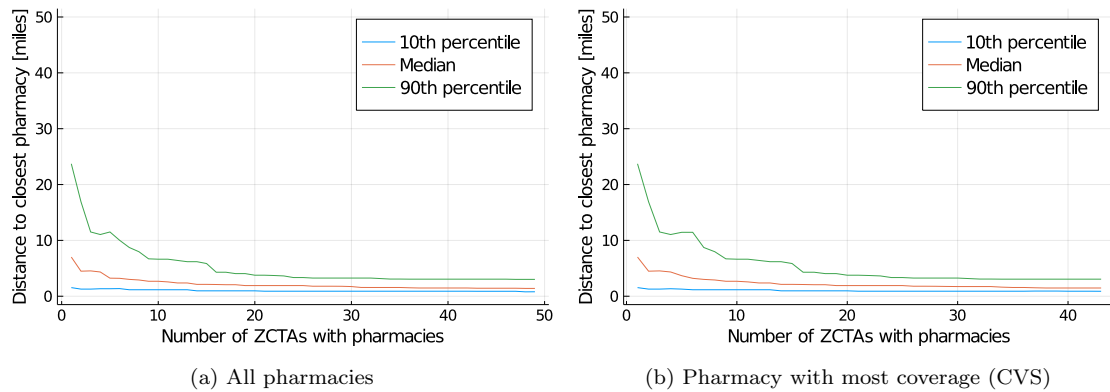

Figure B.82: Distances the population must travel (median, 10th percentile, and 90th percentile) given an optimal pharmacy selection under an increasing number of selected pharmacies. Part (a) shows all pharmacies while part (b) shows the chain with the best coverage.

Appendix B.40. South Carolina

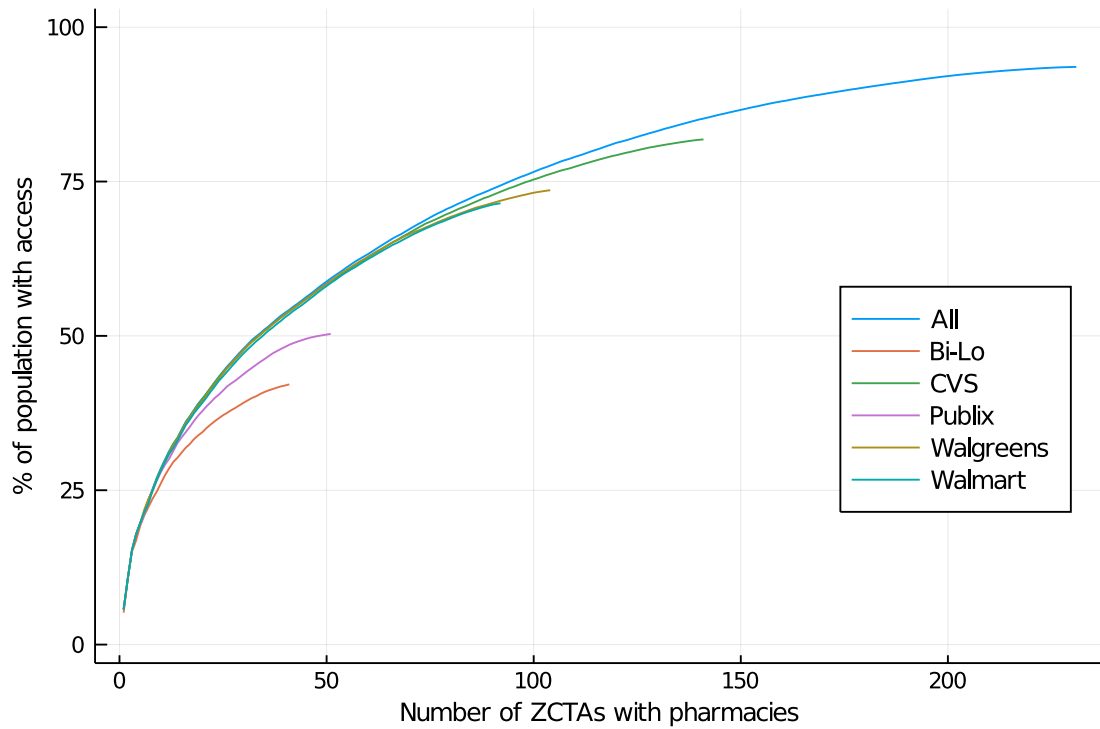

Figure B.83: Estimated fraction of the state’s population willing to travel to its closest pharmacy under an increasing maximum amount of pharmacies that administer COVID-19 testing. Results are shown for all pharmacies and for individual pharmacy chains.

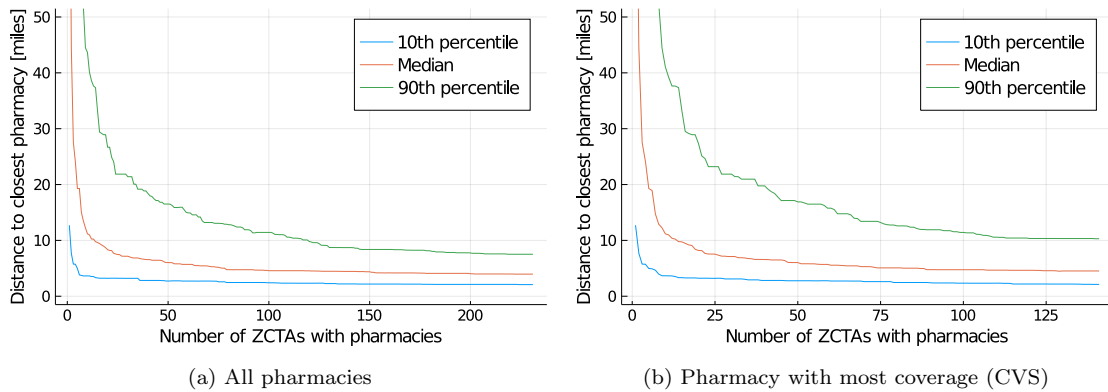

Figure B.84: Distances the population must travel (median, 10th percentile, and 90th percentile) given an optimal pharmacy selection under an increasing number of selected pharmacies. Part (a) shows all pharmacies while part (b) shows the chain with the best coverage.

Appendix B.41. South Dakota

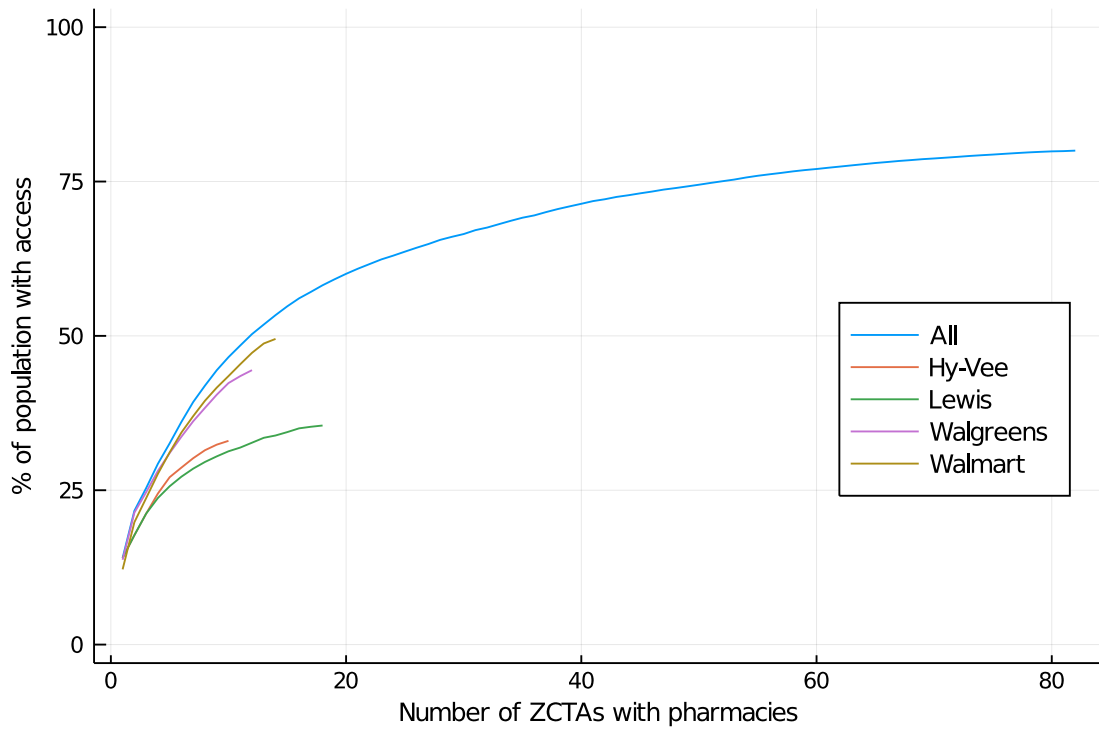

Figure B.85: Estimated fraction of the state’s population willing to travel to its closest pharmacy under an increasing maximum amount of pharmacies that administer COVID-19 testing. Results are shown for all pharmacies and for individual pharmacy chains.

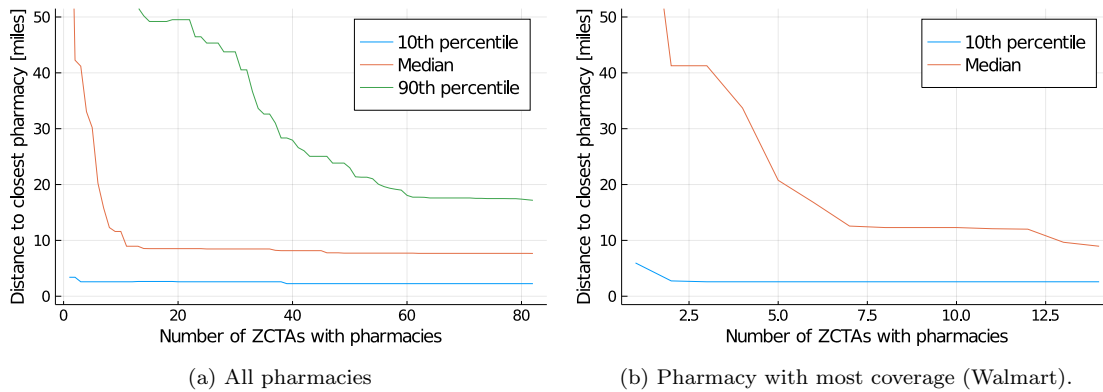

Figure B.86: Distances the population must travel (median, 10th percentile, and 90th percentile) given an optimal pharmacy selection under an increasing number of selected pharmacies. Part (a) shows all pharmacies while part (b) shows the chain with the best coverage. Note: the 90th percentile of the travel distances for part (b) exceed 50 miles.

Appendix B.42. Tennessee

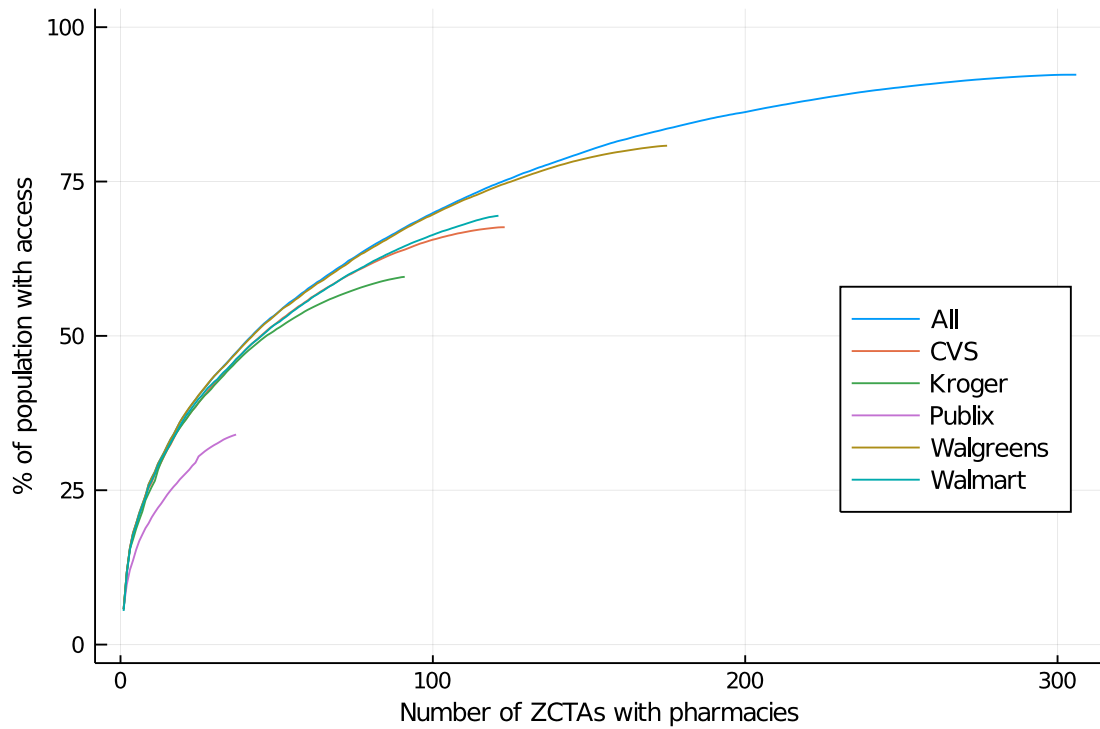

Figure B.87: Estimated fraction of the state’s population willing to travel to its closest pharmacy under an increasing maximum amount of pharmacies that administer COVID-19 testing. Results are shown for all pharmacies and for individual pharmacy chains.

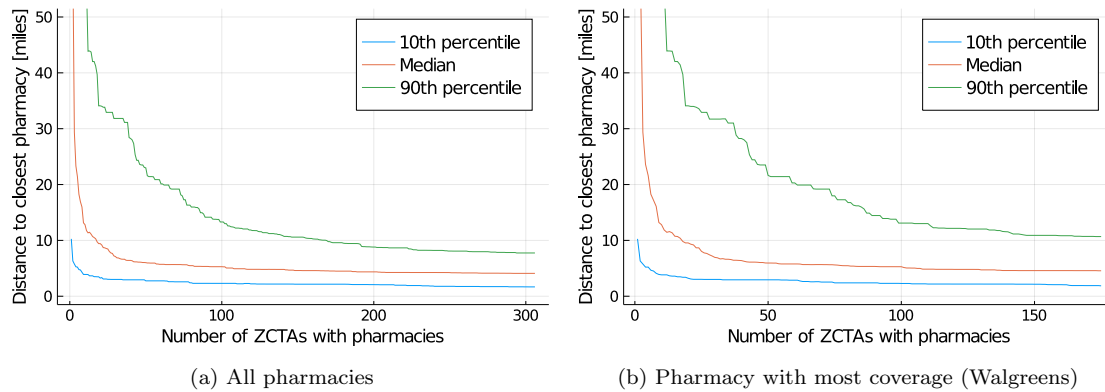

Figure B.88: Distances the population must travel (median, 10th percentile, and 90th percentile) given an optimal pharmacy selection under an increasing number of selected pharmacies. Part (a) shows all pharmacies while part (b) shows the chain with the best coverage.

Appendix B.43. Texas

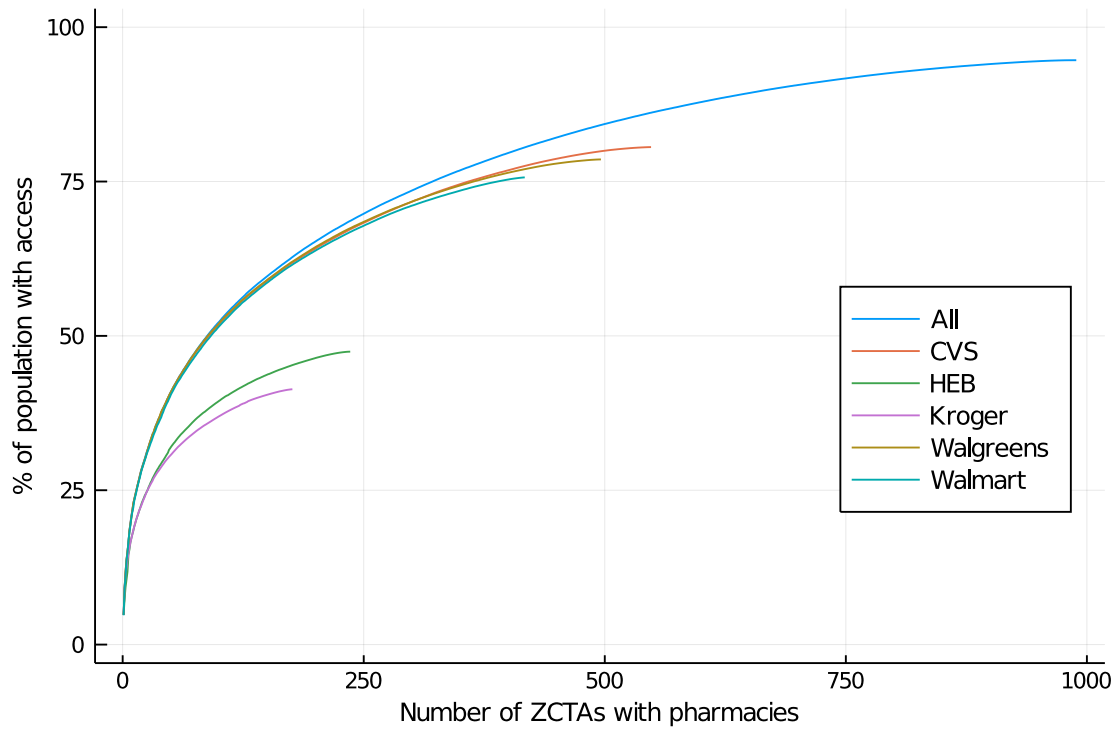

Figure B.89: Estimated fraction of the state’s population willing to travel to its closest pharmacy under an increasing maximum amount of pharmacies that administer COVID-19 testing. Results are shown for all pharmacies and for individual pharmacy chains.

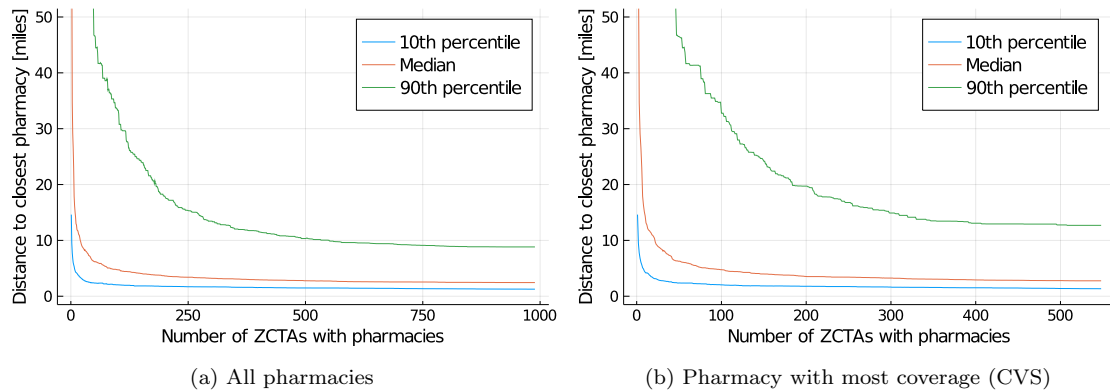

Figure B.90: Distances the population must travel (median, 10th percentile, and 90th percentile) given an optimal pharmacy selection under an increasing number of selected pharmacies. Part (a) shows all pharmacies while part (b) shows the chain with the best coverage.

Appendix B.44. Utah

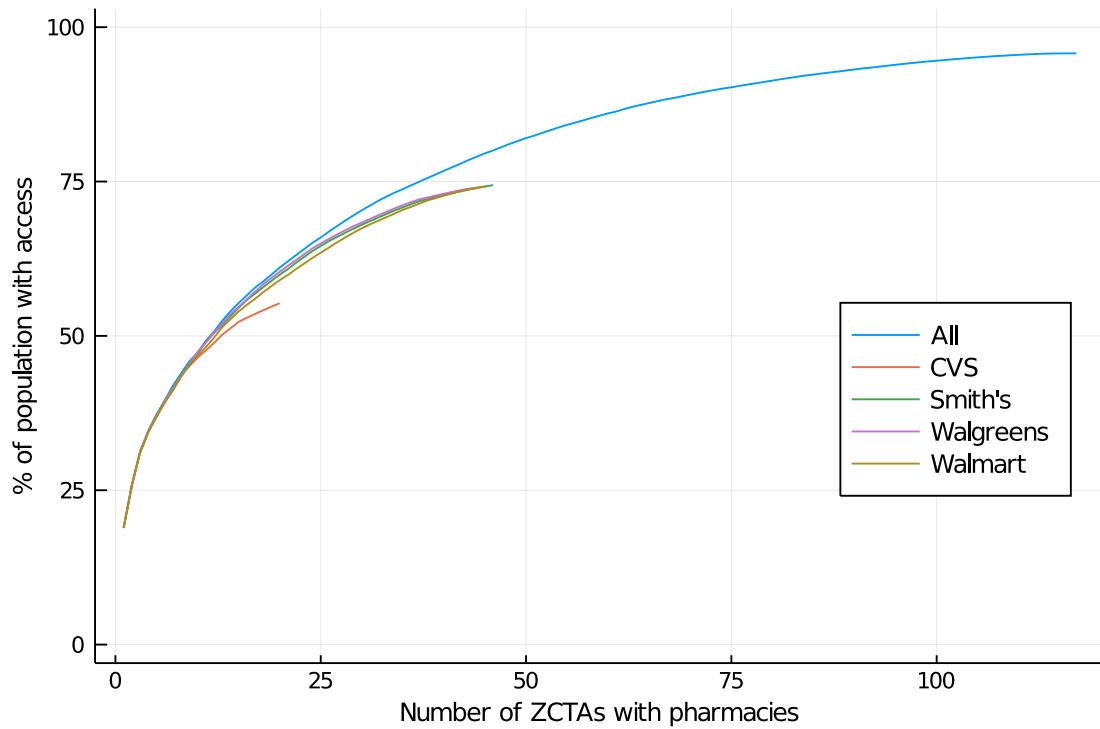

Figure B.91: Estimated fraction of the state’s population willing to travel to its closest pharmacy under an increasing maximum amount of pharmacies that administer COVID-19 testing. Results are shown for all pharmacies and for individual pharmacy chains.

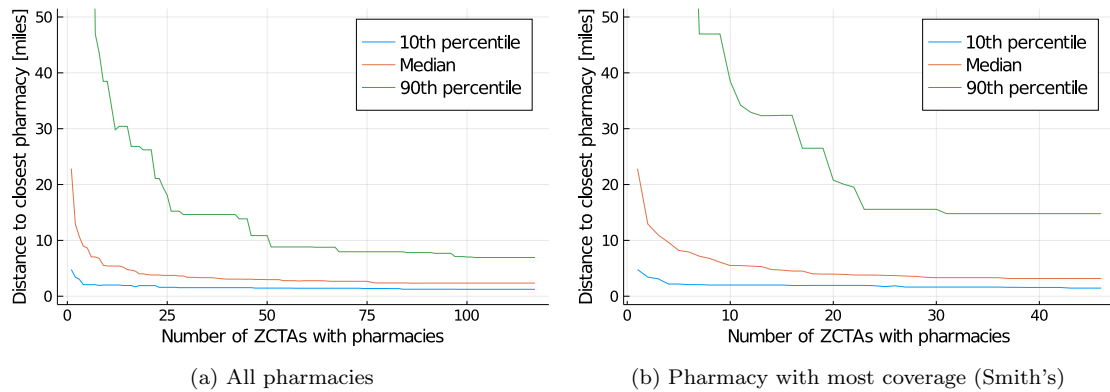

Figure B.92: Distances the population must travel (median, 10th percentile, and 90th percentile) given an optimal pharmacy selection under an increasing number of selected pharmacies. Part (a) shows all pharmacies while part (b) shows the chain with the best coverage.

Appendix B.45. Vermont

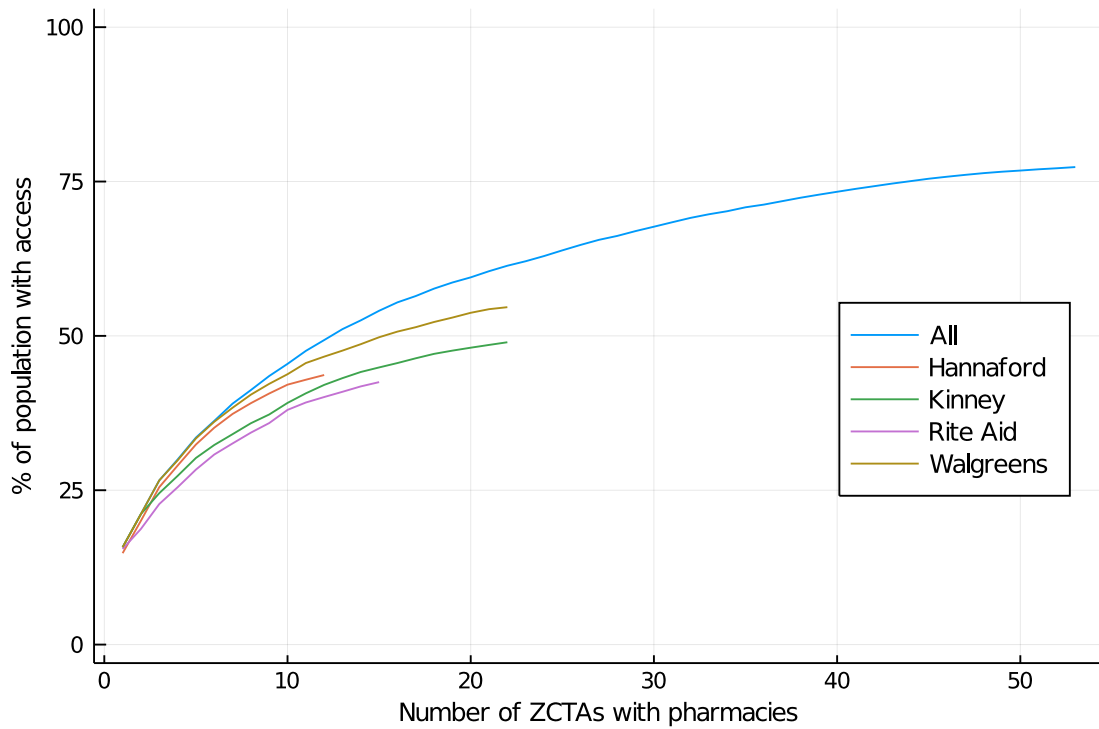

Figure B.93: Estimated fraction of the state’s population willing to travel to its closest pharmacy under an increasing maximum amount of pharmacies that administer COVID-19 testing. Results are shown for all pharmacies and for individual pharmacy chains.

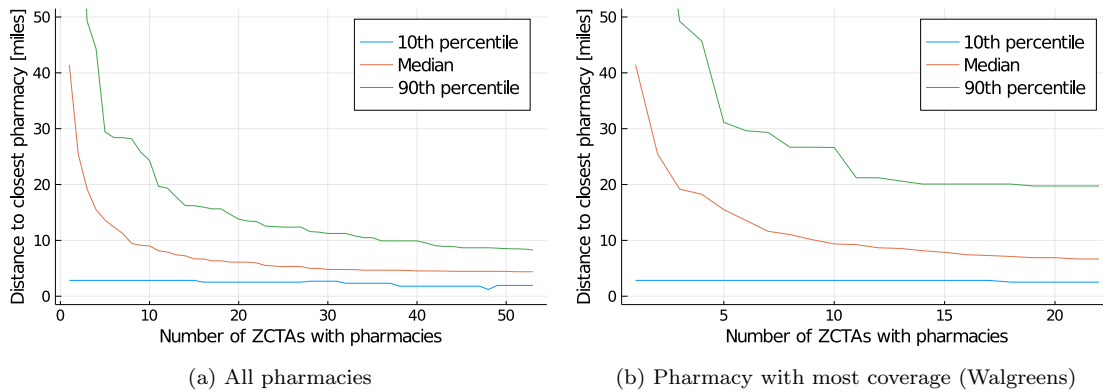

Figure B.94: Distances the population must travel (median, 10th percentile, and 90th percentile) given an optimal pharmacy selection under an increasing number of selected pharmacies. Part (a) shows all pharmacies while part (b) shows the chain with the best coverage.

Appendix B.46. Virginia

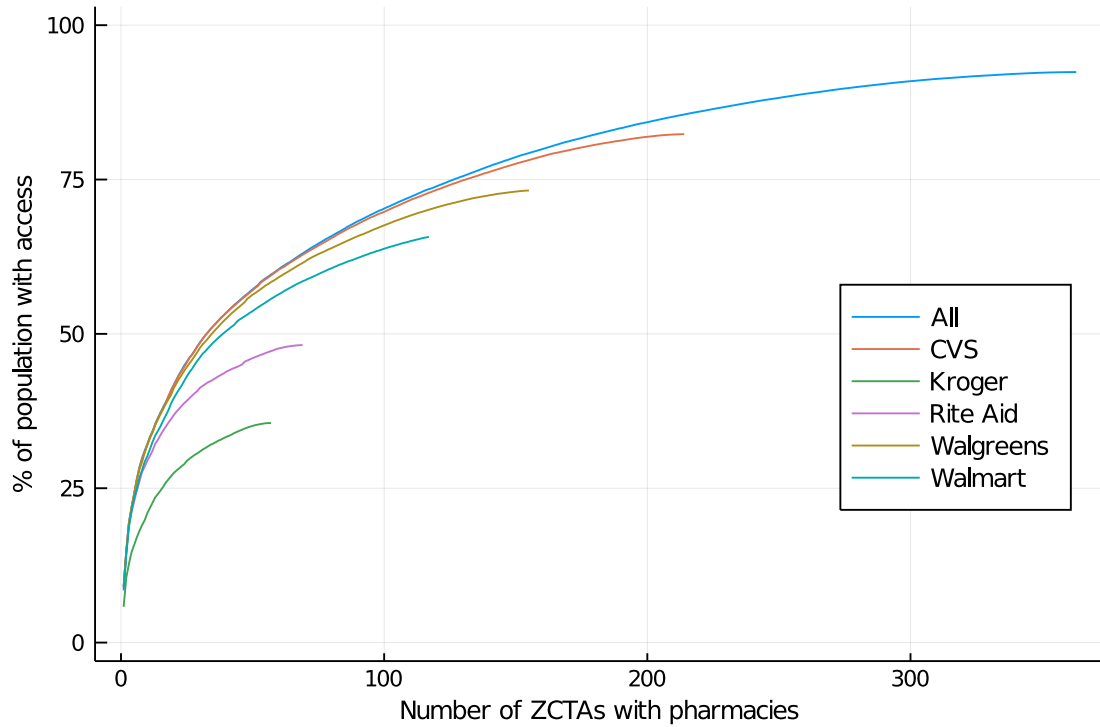

Figure B.95: Estimated fraction of the state’s population willing to travel to its closest pharmacy under an increasing maximum amount of pharmacies that administer COVID-19 testing. Results are shown for all pharmacies and for individual pharmacy chains.

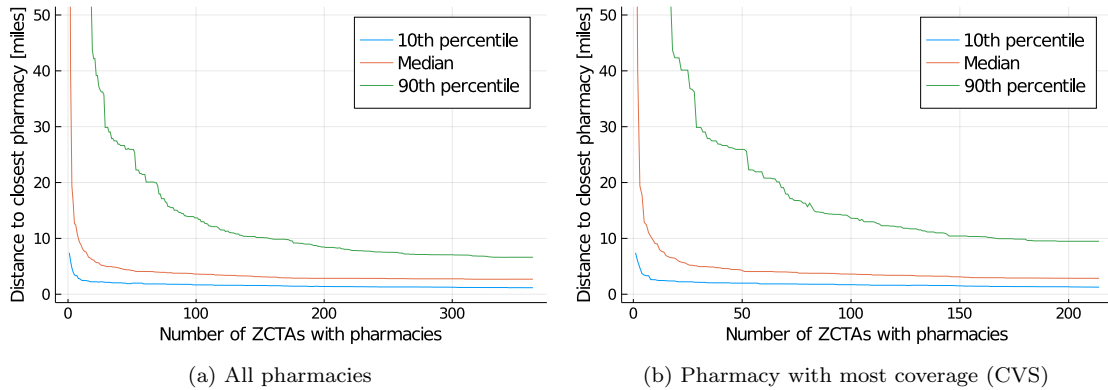

Figure B.96: Distances the population must travel (median, 10th percentile, and 90th percentile) given an optimal pharmacy selection under an increasing number of selected pharmacies. Part (a) shows all pharmacies while part (b) shows the chain with the best coverage.



Appendix B.47. Washington

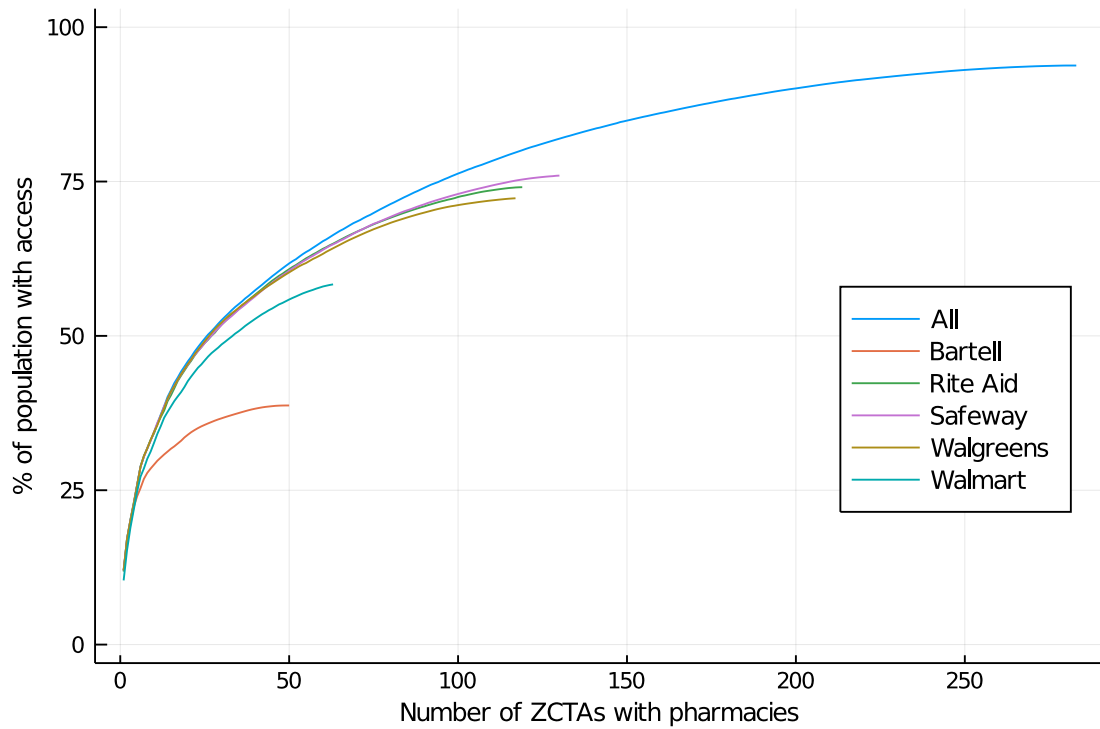

Figure B.97: Estimated fraction of the state’s population willing to travel to its closest pharmacy under an increasing maximum amount of pharmacies that administer COVID-19 testing. Results are shown for all pharmacies and for individual pharmacy chains.

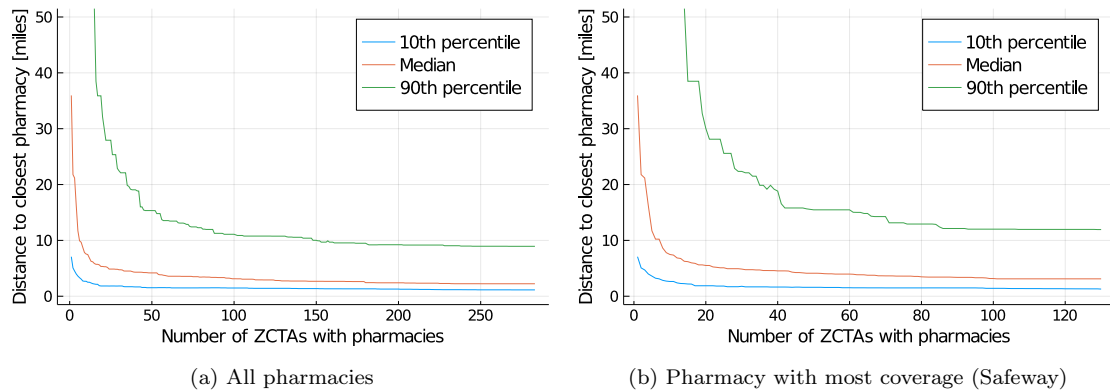

Figure B.98: Distances the population must travel (median, 10th percentile, and 90th percentile) given an optimal pharmacy selection under an increasing number of selected pharmacies. Part (a) shows all pharmacies while part (b) shows the chain with the best coverage.

Appendix B.48. West Virginia

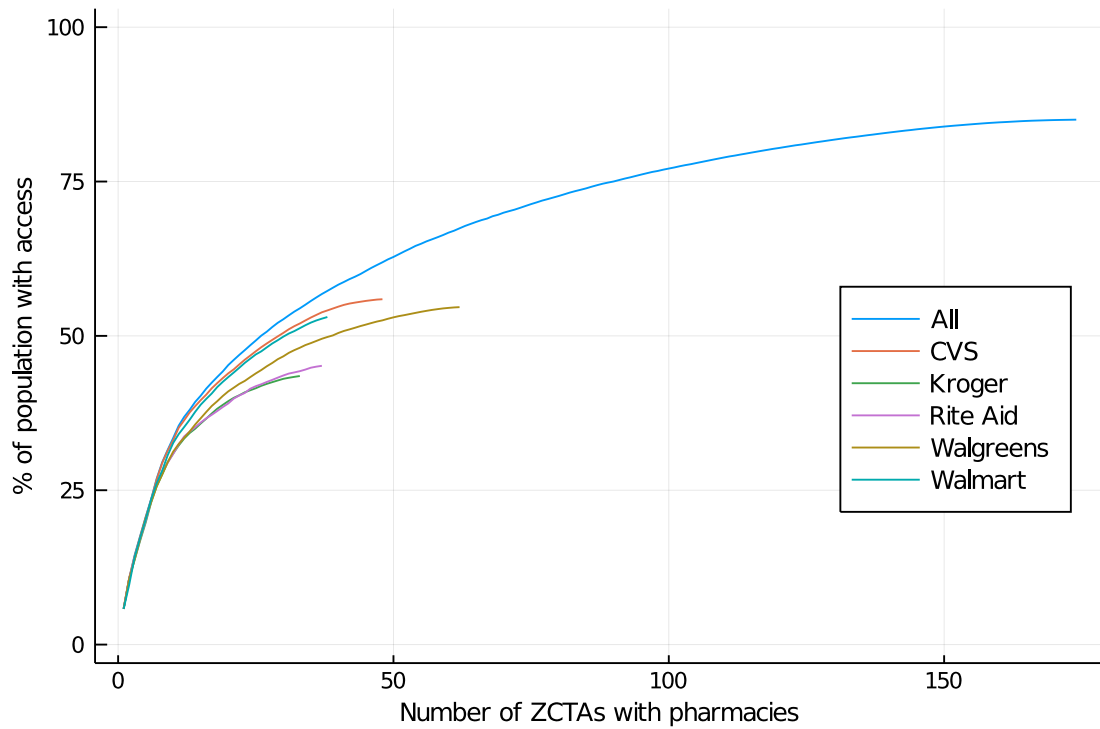

Figure B.99: Estimated fraction of the state’s population willing to travel to its closest pharmacy under an increasing maximum amount of pharmacies that administer COVID-19 testing. Results are shown for all pharmacies and for individual pharmacy chains.

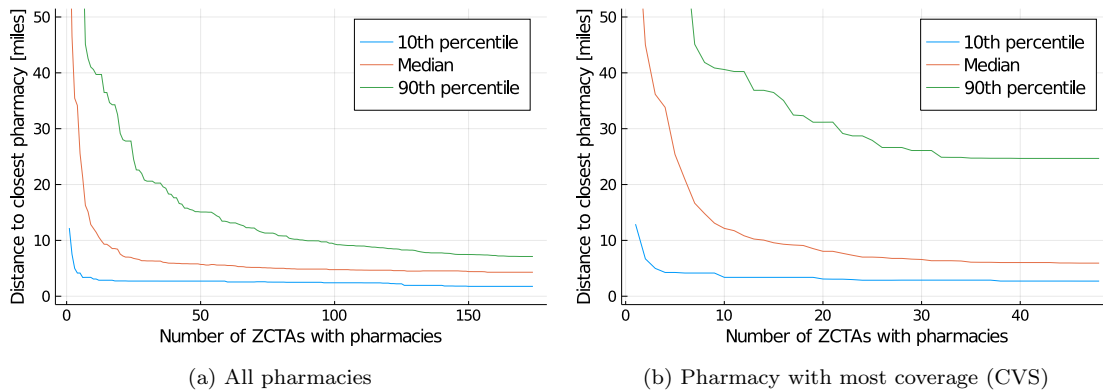

Figure B.100: Distances the population must travel (median, 10th percentile, and 90th percentile) given an optimal pharmacy selection under an increasing number of selected pharmacies. Part (a) shows all pharmacies while part (b) shows the chain with the best coverage.

Appendix B.49. Wisconsin

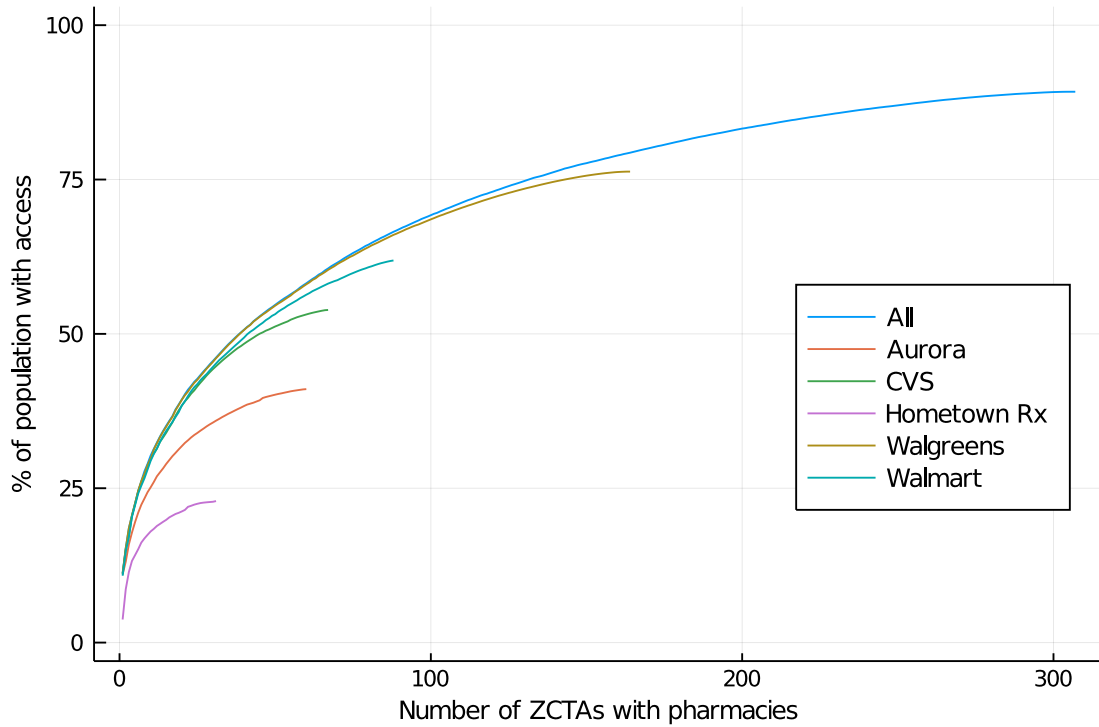

Figure B.101: Estimated fraction of the state’s population willing to travel to its closest pharmacy under an increasing maximum amount of pharmacies that administer COVID-19 testing. Results are shown for all pharmacies and for individual pharmacy chains.

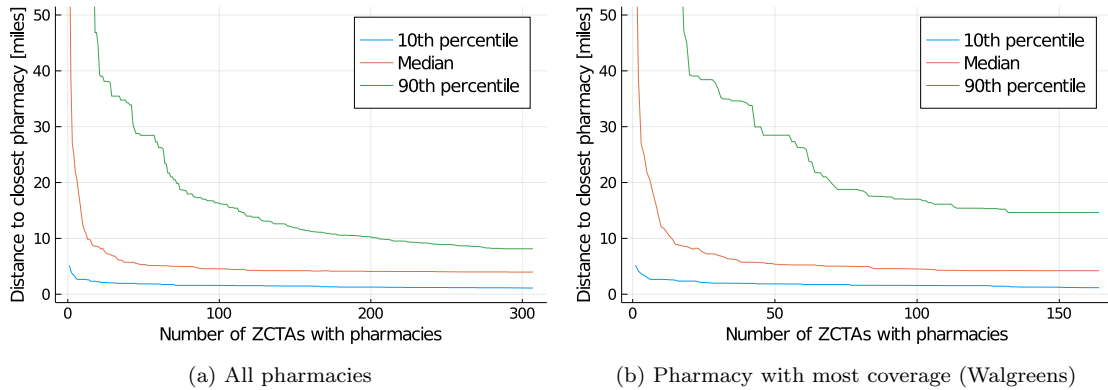

Figure B.102: Distances the population must travel (median, 10th percentile, and 90th percentile) given an optimal pharmacy selection under an increasing number of selected pharmacies. Part (a) shows all pharmacies while part (b) shows the chain with the best coverage.

Appendix B.50. Wyoming

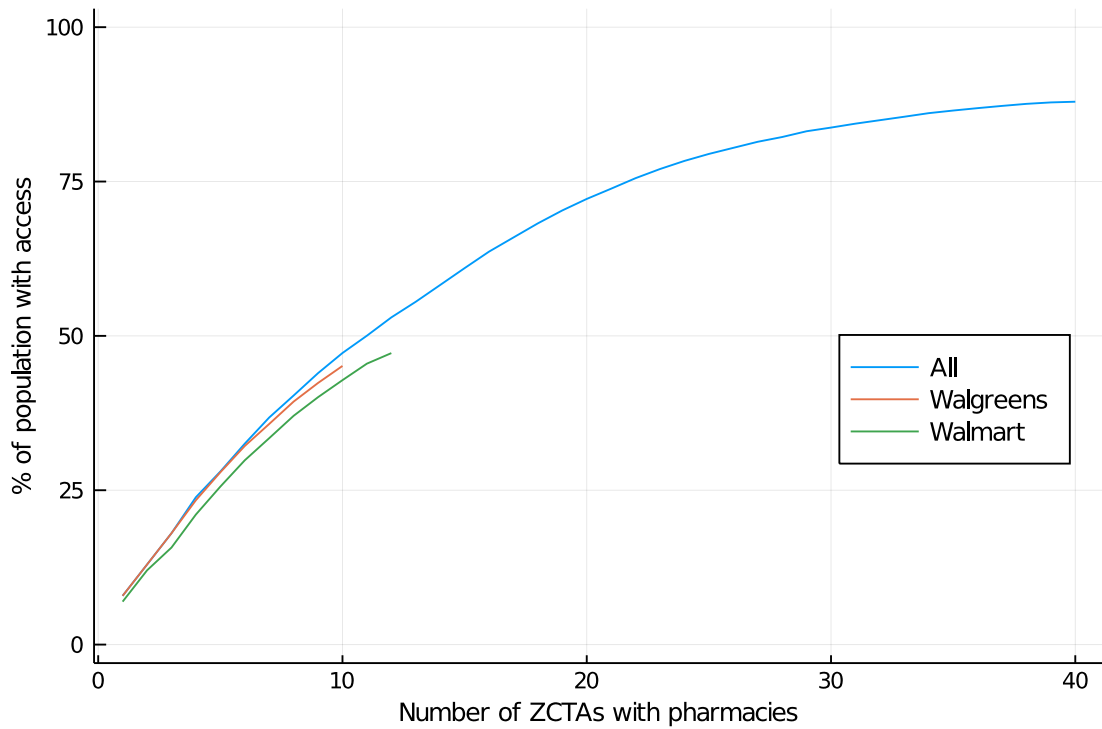

Figure B.103: Estimated fraction of the state’s population willing to travel to its closest pharmacy under an increasing maximum amount of pharmacies that administer COVID-19 testing. Results are shown for all pharmacies and for individual pharmacy chains.

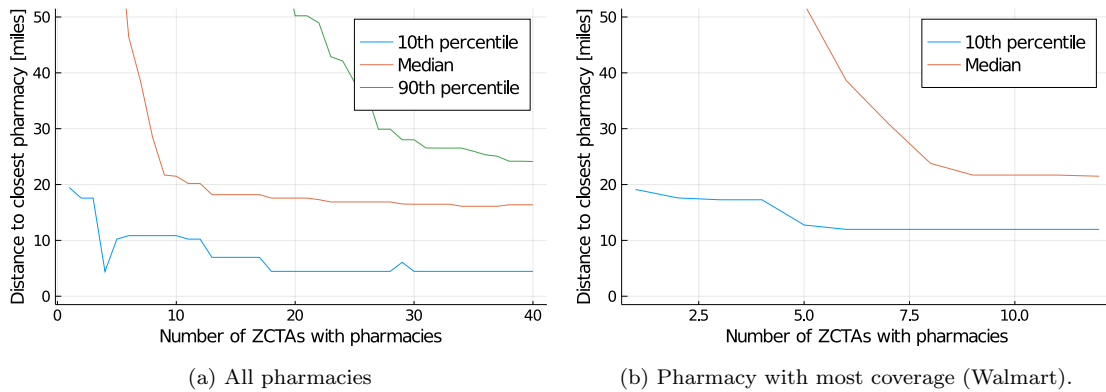

Figure B.104: Distances the population must travel (median, 10th percentile, and 90th percentile) given an optimal pharmacy selection under an increasing number of selected pharmacies. Part (a) shows all pharmacies while part (b) shows the chain with the best coverage. Note: the 90th percentile of the travel distances for part (b) exceed 50 miles.
